# Supplementary material
Source: MDPI journal article supplement (https://www.mdpi.com/2073-4344/12/9/1039)
Supplement: s1 [file s1]

# Supplementary Materials

## Density functional theory study of the regioselectivity in copolymerization of *bis*-styrenic molecules with propylene using zirconocene catalyst

Shu-Yuan Yu,<sup>1</sup> Xiaoxia Peng,<sup>1</sup> Fuping Wang,<sup>1</sup> Jian Cao,<sup>1</sup> Fei Wang,<sup>1</sup> Cheng-Gen Zhang,<sup>1,2,\*</sup>

<sup>1</sup> College of Chemistry and Material Science, Langfang Normal University, Langfang 065000, China

<sup>2</sup> College of Chemistry and Chemical Engineering, University of Chinese Academy of Sciences, Beijing 100049, China

Correspondence to: C.-G. Zhang ( E-mail: chgzhang04@mails.ucas.ac.cn )

### Contents

**Figure S1:** The relative free energy for the insertions of propylene into the Zr–C bond of [Zr]–CH<sub>3</sub>.

**Figure S2:** Optimized structures of the key TSs and intermediates (IMs) shown in Figure S1.

**Figure S3:** The relative free energy for the insertions of DVB or BVPE into the Zr–C bond of [Zr]–PP<sub>1</sub>.

**Figure S4:** Optimized structures of the key TSs and products shown in Figure S3.

**Figure S5:** The relative free energy for the insertions of propylene into the Zr–C bond of [Zr]–DVB–PP<sub>1</sub> or [Zr]–BVPE–PP<sub>1</sub>.

**Figure S6:** Optimized structures of the key TSs and intermediates (IMs) shown in Figure S5.

**Table S1:** Detailed data of the local reactivity index and fukui functions values for some molecules.

**Table S2:** Energies and cartesian coordinates of all the structures.

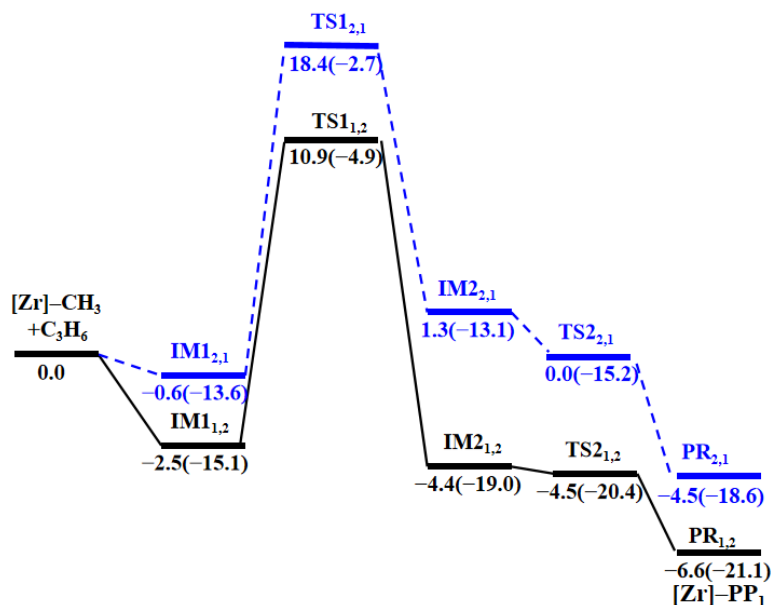

**Figure S1.** The relative free energy for the insertions of propylene into the Zr-C bond of [Zr]-CH<sub>3</sub> (in kcal/mol), and the relative enthalpy is also given in parentheses for reference (in kcal/mol). The black and blue pathways represent the 1,2- and 2,1-insertion, respectively.

The pathways for the insertions of propylene into the Zr-C bond of [Zr]-CH<sub>3</sub>.

Briefly, propylene prefers 1,2-insertion over 2,1-insertion both kinetically and thermodynamically, explaining the observed 1,2-insertion regioselectivity for propylene insertion. Relative to the complex before the transition state, the barrier for 1,2-insertion is 13.4 kcal/mol, compared with the 19.0 kcal/mol for 2,1-insertion. The 1,2-insertion is over all exergonic by 6.6 kcal/mol, compared with the exergonic 4.5 kcal/mol for 2,1-insertion. The kinetic and thermodynamic preference of 1,2- over 2,1-insertion is in agreement with the observed 1,2-insertion regioselectivity in the propylene polymerization.

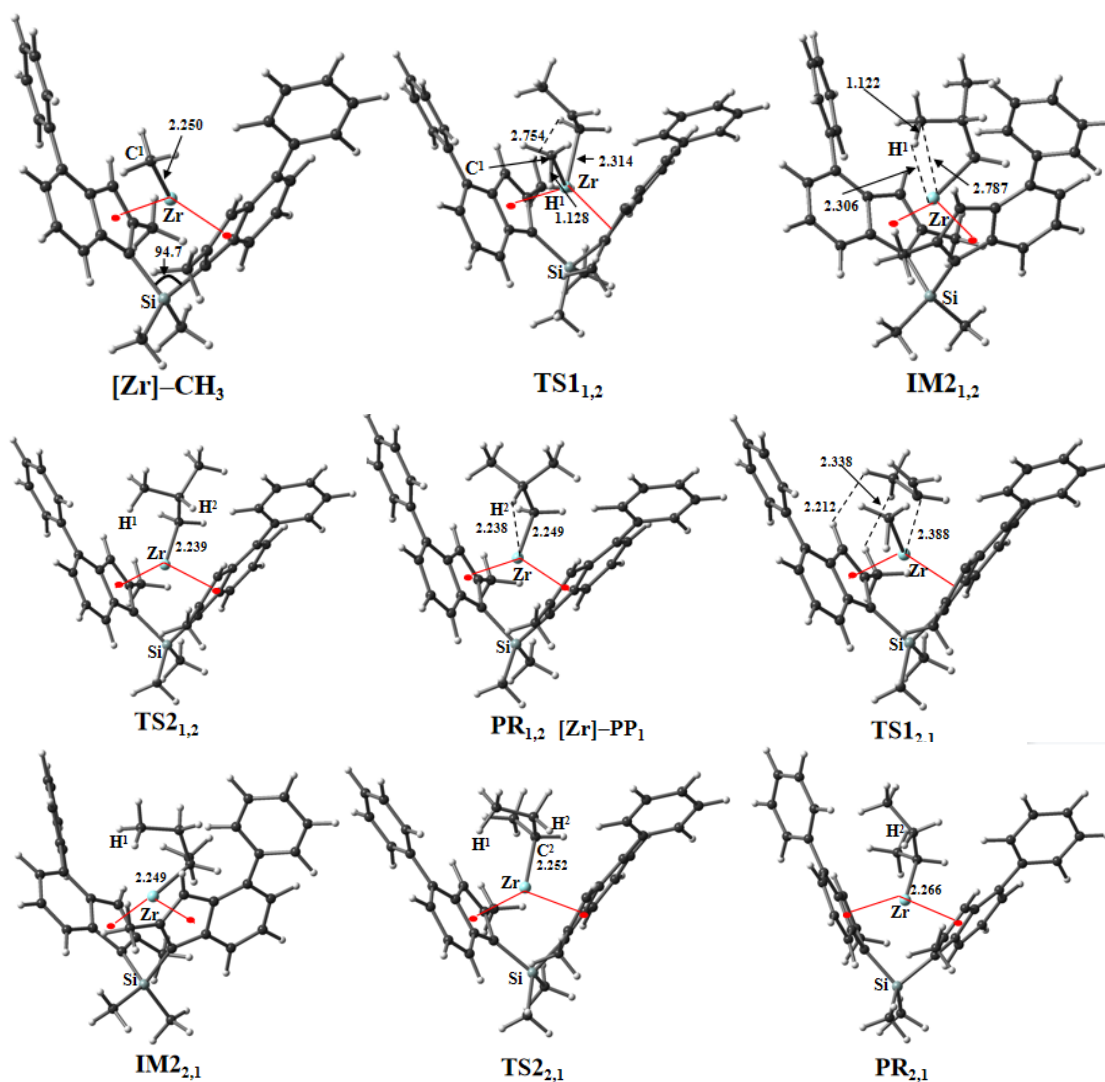

**Figure S2.** Optimized structures of the key TSs and intermediates (IMs) shown in Figure S1. Key bond lengths are given in angstrom.

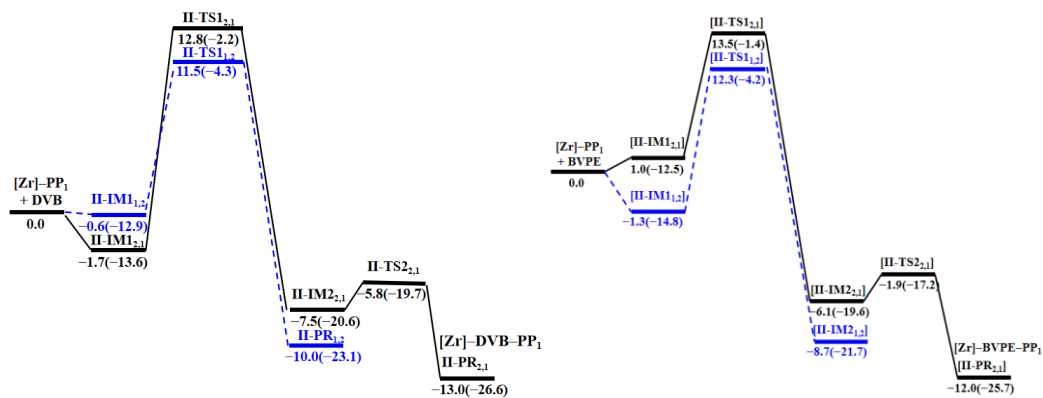

**Figure S3.** The relative free energy for the insertions of DVB or BVPE into the Zr-C bond of [Zr]-PP<sub>1</sub> (in kcal/mol), and the relative enthalpy is also given in parentheses

for reference (in kcal/mol). The black and blue pathways represent the 1,2- and 2,1-insertion, respectively.

The pathways for the insertions of DVB or BVPE into the Zr–C bond of [Zr]–PP<sub>1</sub>. The 2,1-insertion of DVB [BVPE] is kinetically slightly less favorable but thermodynamically more favorable than 1,2-insertion. The observation of 2,1-insertion DVB [BVPE] at the end of polymer chain is due to thermodynamic control.

Overall, the 2,1-insertion is thermodynamically more favorable than 1,2-insertion by 3.0 [3.3] kcal/mol, Although the 1,2-insertion is kinetically slightly more favorable than the 2,1-insertion, the reaction would result in due to [Zr]–DVB–PP<sub>1</sub> [ or [Zr]–BVPE–PP<sub>1</sub>] thermodynamic control.

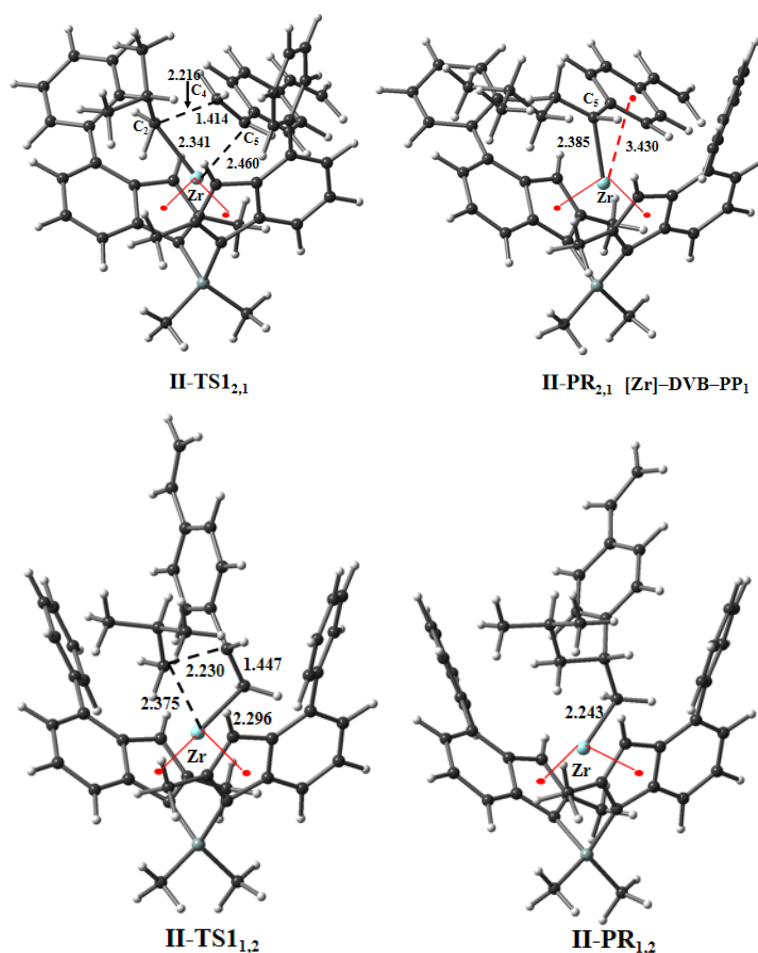

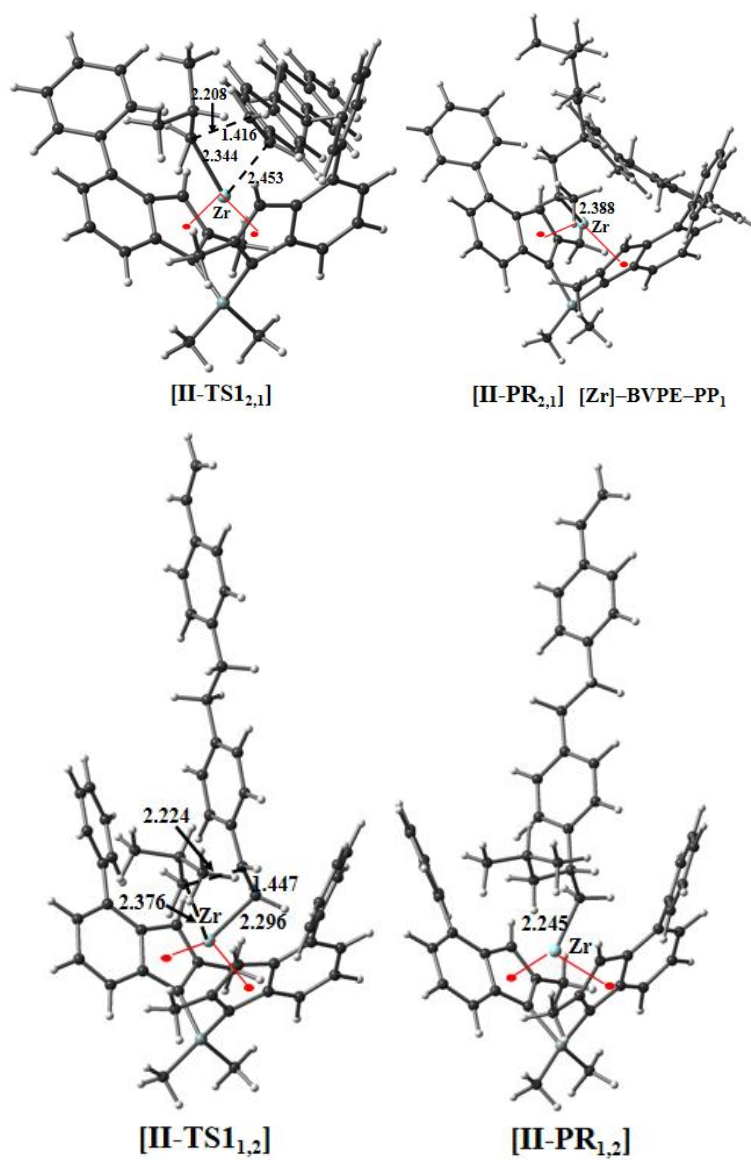

**Figure S4.** Optimized structures of the key TSs and products shown in Figure S3. Key bond lengths are given in angstrom.

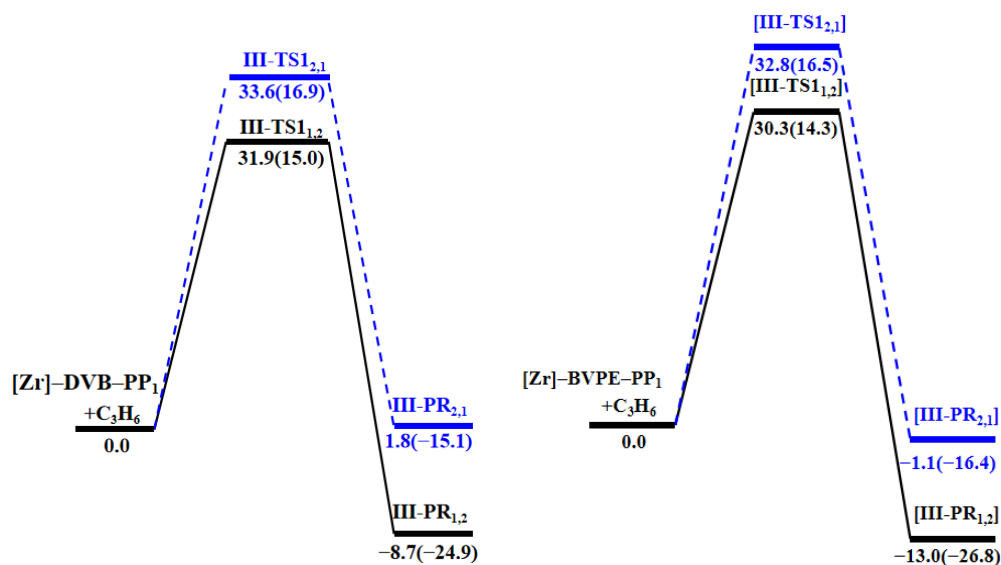

**Figure S5.** The relative free energy for the insertions of propylene into the Zr–C bond of [Zr]–DVB–PP<sub>1</sub> or [Zr]–BVPE–PP<sub>1</sub> (in kcal/mol), and the relative enthalpy is also given in parentheses for reference (in kcal/mol). The black and blue pathways represent the 1,2- and 2,1-insertion, respectively.

The pathways for the insertions of propylene into the Zr–C bond of [Zr]–DVB–PP<sub>1</sub> or [Zr]–BVPE–PP<sub>1</sub>. Briefly, the barriers for propylene 1,2- and 2,1-insertions for [Zr]–DVB–PP<sub>1</sub> and [Zr]–BVPE–PP<sub>1</sub> are 31.9 [33.6] and 30.3 [32.8] kcal/mol, respectively, which are much higher than those for propylene insertions into [Zr]–PP<sub>1</sub>. The high barriers indicates the insertion of a DVB[BVPE] explain would hinder subsequent insertion of either propylene, deactivating the catalytic system.

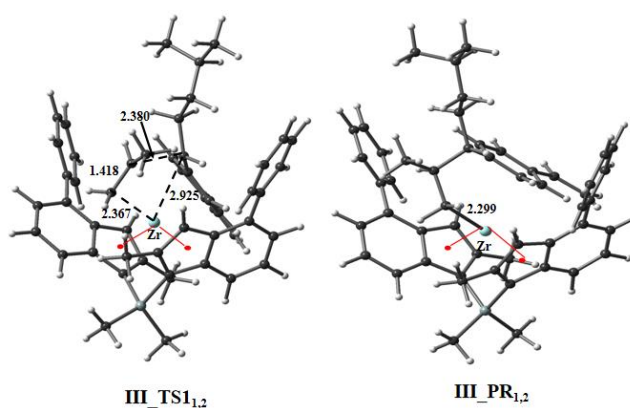

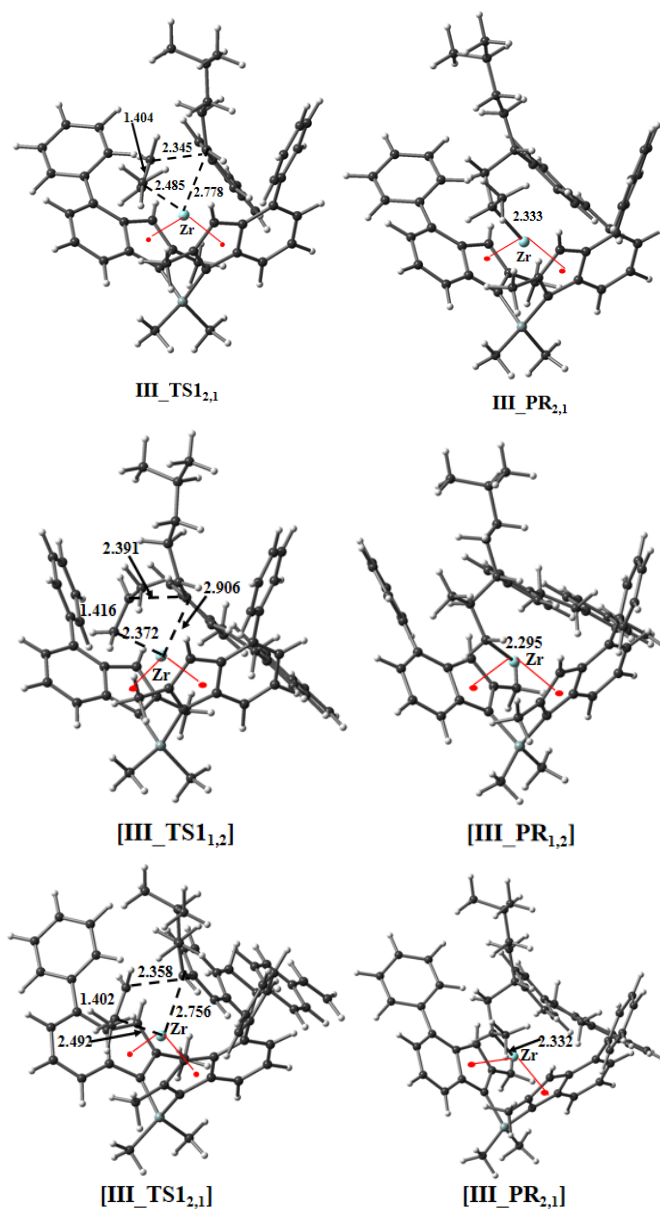

**Figure S6.** Optimized structures of the key TSs and products shown in Figure S5. Key bond lengths are given in angstrom.

**Table S1:** Detailed data of the local reactivity index values and fukui functions values for some molecules.

[Zr]-DVB-PP<sub>1</sub>

Condensed local electrophilicity/nucleophilicity index (e\*eV)

| Atom | Electrophilicity | Nucleophilicity |
|------|------------------|-----------------|
| 1(C) | 0.07793          | 0.02576         |
| 2(C) | 0.15259          | 0.04021         |
| 3(C) | 0.02212          | 0.01196         |
| 4(C) | 0.02528          | 0.00432         |
| 5(C) | 0.07637          | 0.02124         |

|        |          |          |
|--------|----------|----------|
| 6(C )  | 0.02417  | 0.00135  |
| 7(Zr)  | 0.84212  | 0.00875  |
| 8(C )  | 0.05956  | 0.01440  |
| 9(C )  | 0.03422  | 0.00507  |
| 10(C ) | 0.05893  | 0.00583  |
| 11(C ) | 0.03179  | 0.00476  |
| 12(C ) | 0.07190  | 0.01569  |
| 13(Si) | 0.03069  | 0.00573  |
| 14(C ) | 0.02433  | 0.00541  |
| 15(C ) | 0.03262  | 0.00586  |
| 16(C ) | 0.10364  | 0.01252  |
| 17(C ) | 0.02412  | 0.01617  |
| 18(C ) | 0.08156  | 0.01962  |
| 19(C ) | 0.15595  | 0.01683  |
| 20(C ) | 0.04049  | 0.00511  |
| 21(C ) | 0.03274  | 0.00402  |
| 22(C ) | -0.03549 | -0.00210 |
| 23(C ) | 0.05114  | 0.02729  |
| 24(C ) | 0.01421  | 0.04236  |
| 25(C ) | 0.07384  | 0.03729  |
| 26(C ) | 0.11320  | 0.02442  |
| 27(C ) | -0.02714 | 0.00889  |
| 28(C ) | 0.01714  | 0.00521  |
| 29(C ) | 0.05738  | 0.01163  |
| 30(C ) | 0.09074  | 0.01947  |
| 31(C ) | 0.01290  | 0.00298  |
| 32(C ) | 0.05322  | 0.01062  |
| 33(C ) | -0.01717 | 0.01000  |
| 34(C ) | 0.03025  | 0.01682  |
| 35(C ) | 0.08325  | 0.03640  |
| 36(C ) | 0.03613  | 0.01820  |
| 37(C ) | 0.06822  | 0.02134  |
| 38(C ) | 0.01599  | 0.00403  |
| 39(C ) | 0.00138  | 0.00059  |
| 40(C ) | 0.00945  | 0.00140  |
| 41(C ) | 0.04714  | 0.00486  |
| 42(C ) | 0.01657  | 0.00960  |
| 43(C ) | 0.02641  | 0.01693  |
| 44(C ) | 0.11057  | 0.02207  |
| 45(C ) | 0.08633  | 0.01714  |
| 46(C ) | 0.11415  | 0.01115  |
| 47(C ) | 0.01660  | 0.00356  |
| 48(H ) | 0.04341  | 0.00813  |
| 49(H ) | 0.05266  | 0.00797  |
| 50(H ) | 0.05049  | 0.00847  |
| 51(H ) | 0.00454  | 0.00199  |
| 52(H ) | 0.04823  | 0.00944  |
| 53(H ) | 0.04857  | 0.00814  |
| 54(H ) | 0.04900  | 0.01057  |
| 55(H ) | 0.02012  | 0.00221  |
| 56(H ) | 0.03999  | 0.00828  |
| 57(H ) | 0.07062  | 0.01228  |
| 58(H ) | 0.08828  | 0.01214  |
| 59(H ) | 0.03202  | 0.01510  |
| 60(H ) | 0.05977  | 0.01696  |
| 61(H ) | 0.07530  | 0.01784  |
| 62(H ) | 0.01222  | 0.00342  |



|        |          |          |
|--------|----------|----------|
| 63(H ) | 0.04957  | 0.00960  |
| 64(H ) | 0.06063  | 0.01173  |
| 65(H ) | 0.00499  | 0.00111  |
| 66(H ) | 0.04625  | 0.00873  |
| 67(H ) | -0.02323 | 0.00135  |
| 68(H ) | 0.02450  | 0.01153  |
| 69(H ) | 0.05688  | 0.01849  |
| 70(H ) | 0.02690  | 0.01049  |
| 71(H ) | 0.05436  | 0.01604  |
| 72(H ) | 0.03376  | 0.00387  |
| 73(H ) | 0.02467  | 0.00454  |
| 74(H ) | 0.09229  | 0.01147  |
| 75(H ) | 0.02698  | 0.00255  |
| 76(H ) | 0.03520  | 0.00380  |
| 77(H ) | 0.07554  | 0.01195  |
| 78(H ) | 0.01646  | -0.00034 |
| 79(H ) | -0.01295 | -0.00278 |
| 80(H ) | 0.00815  | 0.00364  |
| 81(H ) | 0.01200  | 0.00635  |
| 82(H ) | 0.03223  | 0.00902  |
| 83(H ) | 0.05659  | 0.00876  |
| 84(H ) | 0.07638  | 0.01074  |
| 85(H ) | 0.03477  | 0.00908  |
| 86(H ) | 0.06414  | 0.01340  |
| 87(C ) | 0.01031  | 0.00137  |
| 88(H ) | 0.04576  | 0.00876  |
| 89(H ) | 0.00671  | 0.00118  |
| 90(H ) | 0.01337  | 0.00384  |
| 91(H ) | 0.02682  | 0.00543  |
| 92(H ) | 0.04812  | 0.00970  |
| 93(H ) | -0.00291 | -0.00256 |
| 94(H ) | -0.00147 | -0.00216 |
| 95(C ) | 0.06438  | 0.00983  |
| 96(H ) | 0.05012  | 0.01112  |
| 97(C ) | 0.06692  | 0.02752  |
| 98(H ) | 0.03309  | 0.01015  |
| 99(H ) | 0.08511  | 0.01856  |

Hirshfeld charges, condensed Fukui functions Units used below are "e" (elementary charge)

| Atom   | q(N)    | q(N+1)  | q(N-1)  | f-     | f+     | f0     |
|--------|---------|---------|---------|--------|--------|--------|
| 1(C )  | -0.1296 | -0.1449 | -0.1054 | 0.0242 | 0.0153 | 0.0198 |
| 2(C )  | -0.0662 | -0.0962 | -0.0284 | 0.0378 | 0.0300 | 0.0339 |
| 3(C )  | -0.0376 | -0.0420 | -0.0264 | 0.0112 | 0.0043 | 0.0078 |
| 4(C )  | -0.0226 | -0.0275 | -0.0185 | 0.0041 | 0.0050 | 0.0045 |
| 5(C )  | -0.0555 | -0.0705 | -0.0355 | 0.0200 | 0.0150 | 0.0175 |
| 6(C )  | -0.0021 | -0.0069 | -0.0008 | 0.0013 | 0.0047 | 0.0030 |
| 7(Zr)  | 0.5069  | 0.3414  | 0.5152  | 0.0082 | 0.1655 | 0.0869 |
| 8(C )  | -0.1378 | -0.1495 | -0.1242 | 0.0135 | 0.0117 | 0.0126 |
| 9(C )  | -0.0269 | -0.0337 | -0.0222 | 0.0048 | 0.0067 | 0.0057 |
| 10(C ) | 0.0046  | -0.0070 | 0.0101  | 0.0055 | 0.0116 | 0.0085 |
| 11(C ) | -0.0129 | -0.0192 | -0.0084 | 0.0045 | 0.0062 | 0.0054 |
| 12(C ) | -0.0569 | -0.0711 | -0.0422 | 0.0148 | 0.0141 | 0.0144 |
| 13(Si) | 0.3745  | 0.3684  | 0.3798  | 0.0054 | 0.0060 | 0.0057 |

|        |         |         |         |         |         |         |
|--------|---------|---------|---------|---------|---------|---------|
| 14(C ) | -0.1712 | -0.1759 | -0.1661 | 0.0051  | 0.0048  | 0.0049  |
| 15(C ) | -0.1693 | -0.1757 | -0.1638 | 0.0055  | 0.0064  | 0.0060  |
| 16(C ) | 0.0230  | 0.0026  | 0.0347  | 0.0118  | 0.0204  | 0.0161  |
| 17(C ) | -0.0273 | -0.0320 | -0.0121 | 0.0152  | 0.0047  | 0.0100  |
| 18(C ) | -0.0262 | -0.0422 | -0.0077 | 0.0184  | 0.0160  | 0.0172  |
| 19(C ) | -0.0233 | -0.0539 | -0.0074 | 0.0158  | 0.0306  | 0.0232  |
| 20(C ) | -0.0686 | -0.0766 | -0.0638 | 0.0048  | 0.0080  | 0.0064  |
| 21(C ) | -0.0702 | -0.0766 | -0.0664 | 0.0038  | 0.0064  | 0.0051  |
| 22(C ) | -0.0031 | 0.0038  | -0.0051 | -0.0020 | -0.0070 | -0.0045 |
| 23(C ) | 0.0172  | 0.0071  | 0.0429  | 0.0257  | 0.0101  | 0.0179  |
| 24(C ) | -0.0301 | -0.0329 | 0.0098  | 0.0398  | 0.0028  | 0.0213  |
| 25(C ) | -0.0266 | -0.0411 | 0.0085  | 0.0351  | 0.0145  | 0.0248  |
| 26(C ) | -0.0273 | -0.0495 | -0.0043 | 0.0230  | 0.0222  | 0.0226  |
| 27(C ) | -0.0027 | 0.0027  | 0.0057  | 0.0084  | -0.0053 | 0.0015  |
| 28(C ) | -0.0368 | -0.0402 | -0.0319 | 0.0049  | 0.0034  | 0.0041  |
| 29(C ) | -0.0310 | -0.0422 | -0.0200 | 0.0109  | 0.0113  | 0.0111  |
| 30(C ) | -0.0250 | -0.0428 | -0.0067 | 0.0183  | 0.0178  | 0.0181  |
| 31(C ) | -0.0374 | -0.0400 | -0.0346 | 0.0028  | 0.0025  | 0.0027  |
| 32(C ) | -0.0303 | -0.0408 | -0.0204 | 0.0100  | 0.0105  | 0.0102  |
| 33(C ) | -0.0475 | -0.0441 | -0.0381 | 0.0094  | -0.0034 | 0.0030  |
| 34(C ) | -0.0380 | -0.0440 | -0.0222 | 0.0158  | 0.0059  | 0.0109  |
| 35(C ) | -0.0279 | -0.0443 | 0.0063  | 0.0342  | 0.0164  | 0.0253  |
| 36(C ) | -0.0343 | -0.0414 | -0.0172 | 0.0171  | 0.0071  | 0.0121  |
| 37(C ) | -0.0303 | -0.0437 | -0.0102 | 0.0201  | 0.0134  | 0.0167  |
| 38(C ) | -0.0473 | -0.0504 | -0.0435 | 0.0038  | 0.0031  | 0.0035  |
| 39(C ) | -0.0460 | -0.0463 | -0.0455 | 0.0006  | 0.0003  | 0.0004  |
| 40(C ) | -0.0107 | -0.0126 | -0.0094 | 0.0013  | 0.0019  | 0.0016  |
| 41(C ) | 0.0097  | 0.0004  | 0.0143  | 0.0046  | 0.0093  | 0.0069  |
| 42(C ) | -0.0748 | -0.0781 | -0.0658 | 0.0090  | 0.0033  | 0.0061  |
| 43(C ) | -0.0106 | -0.0157 | 0.0054  | 0.0159  | 0.0052  | 0.0106  |
| 44(C ) | 0.0059  | -0.0158 | 0.0266  | 0.0208  | 0.0217  | 0.0212  |
| 45(C ) | -0.0212 | -0.0382 | -0.0051 | 0.0161  | 0.0170  | 0.0165  |
| 46(C ) | -0.0089 | -0.0314 | 0.0015  | 0.0105  | 0.0224  | 0.0165  |
| 47(C ) | -0.0853 | -0.0885 | -0.0819 | 0.0033  | 0.0033  | 0.0033  |
| 48(H ) | 0.0526  | 0.0441  | 0.0603  | 0.0076  | 0.0085  | 0.0081  |
| 49(H ) | 0.0578  | 0.0475  | 0.0653  | 0.0075  | 0.0103  | 0.0089  |
| 50(H ) | 0.0476  | 0.0377  | 0.0556  | 0.0080  | 0.0099  | 0.0089  |
| 51(H ) | 0.0350  | 0.0341  | 0.0369  | 0.0019  | 0.0009  | 0.0014  |
| 52(H ) | 0.0473  | 0.0378  | 0.0562  | 0.0089  | 0.0095  | 0.0092  |
| 53(H ) | 0.0485  | 0.0390  | 0.0561  | 0.0077  | 0.0095  | 0.0086  |
| 54(H ) | 0.0479  | 0.0383  | 0.0579  | 0.0099  | 0.0096  | 0.0098  |
| 55(H ) | 0.0383  | 0.0344  | 0.0404  | 0.0021  | 0.0040  | 0.0030  |
| 56(H ) | 0.0515  | 0.0437  | 0.0593  | 0.0078  | 0.0079  | 0.0078  |
| 57(H ) | 0.0551  | 0.0412  | 0.0667  | 0.0115  | 0.0139  | 0.0127  |

|        |         |         |         |         |         |         |
|--------|---------|---------|---------|---------|---------|---------|
| 58(H ) | 0.0575  | 0.0402  | 0.0690  | 0.0114  | 0.0173  | 0.0144  |
| 59(H ) | 0.0471  | 0.0408  | 0.0613  | 0.0142  | 0.0063  | 0.0102  |
| 60(H ) | 0.0507  | 0.0390  | 0.0667  | 0.0159  | 0.0117  | 0.0138  |
| 61(H ) | 0.0558  | 0.0410  | 0.0726  | 0.0168  | 0.0148  | 0.0158  |
| 62(H ) | 0.0447  | 0.0423  | 0.0479  | 0.0032  | 0.0024  | 0.0028  |
| 63(H ) | 0.0537  | 0.0440  | 0.0628  | 0.0090  | 0.0097  | 0.0094  |
| 64(H ) | 0.0559  | 0.0440  | 0.0669  | 0.0110  | 0.0119  | 0.0115  |
| 65(H ) | 0.0430  | 0.0421  | 0.0441  | 0.0010  | 0.0010  | 0.0010  |
| 66(H ) | 0.0541  | 0.0450  | 0.0623  | 0.0082  | 0.0091  | 0.0087  |
| 67(H ) | 0.0268  | 0.0314  | 0.0281  | 0.0013  | -0.0046 | -0.0016 |
| 68(H ) | 0.0462  | 0.0413  | 0.0570  | 0.0108  | 0.0048  | 0.0078  |
| 69(H ) | 0.0542  | 0.0430  | 0.0716  | 0.0174  | 0.0112  | 0.0143  |
| 70(H ) | 0.0450  | 0.0397  | 0.0548  | 0.0099  | 0.0053  | 0.0076  |
| 71(H ) | 0.0539  | 0.0432  | 0.0690  | 0.0151  | 0.0107  | 0.0129  |
| 72(H ) | 0.0459  | 0.0392  | 0.0495  | 0.0036  | 0.0066  | 0.0051  |
| 73(H ) | 0.0361  | 0.0312  | 0.0403  | 0.0043  | 0.0048  | 0.0046  |
| 74(H ) | 0.0535  | 0.0354  | 0.0643  | 0.0108  | 0.0181  | 0.0145  |
| 75(H ) | 0.0443  | 0.0390  | 0.0467  | 0.0024  | 0.0053  | 0.0039  |
| 76(H ) | 0.0395  | 0.0326  | 0.0431  | 0.0036  | 0.0069  | 0.0052  |
| 77(H ) | 0.0524  | 0.0376  | 0.0637  | 0.0112  | 0.0148  | 0.0130  |
| 78(H ) | 0.0261  | 0.0229  | 0.0258  | -0.0003 | 0.0032  | 0.0015  |
| 79(H ) | 0.0208  | 0.0233  | 0.0182  | -0.0026 | -0.0025 | -0.0026 |
| 80(H ) | 0.0257  | 0.0241  | 0.0291  | 0.0034  | 0.0016  | 0.0025  |
| 81(H ) | 0.0340  | 0.0317  | 0.0400  | 0.0060  | 0.0024  | 0.0042  |
| 82(H ) | 0.0505  | 0.0442  | 0.0590  | 0.0085  | 0.0063  | 0.0074  |
| 83(H ) | 0.0551  | 0.0440  | 0.0633  | 0.0082  | 0.0111  | 0.0097  |
| 84(H ) | 0.0560  | 0.0410  | 0.0661  | 0.0101  | 0.0150  | 0.0126  |
| 85(H ) | 0.0307  | 0.0238  | 0.0392  | 0.0085  | 0.0068  | 0.0077  |
| 86(H ) | 0.0316  | 0.0189  | 0.0442  | 0.0126  | 0.0126  | 0.0126  |
| 87(C ) | -0.0862 | -0.0882 | -0.0849 | 0.0013  | 0.0020  | 0.0017  |
| 88(H ) | 0.0353  | 0.0263  | 0.0435  | 0.0082  | 0.0090  | 0.0086  |
| 89(H ) | 0.0264  | 0.0251  | 0.0275  | 0.0011  | 0.0013  | 0.0012  |
| 90(H ) | 0.0291  | 0.0265  | 0.0327  | 0.0036  | 0.0026  | 0.0031  |
| 91(H ) | 0.0287  | 0.0235  | 0.0339  | 0.0051  | 0.0053  | 0.0052  |
| 92(H ) | 0.0351  | 0.0256  | 0.0442  | 0.0091  | 0.0095  | 0.0093  |
| 93(H ) | 0.0291  | 0.0296  | 0.0267  | -0.0024 | -0.0006 | -0.0015 |
| 94(H ) | 0.0241  | 0.0244  | 0.0221  | -0.0020 | -0.0003 | -0.0012 |
| 95(C ) | -0.0082 | -0.0209 | 0.0010  | 0.0092  | 0.0127  | 0.0109  |
| 96(H ) | 0.0495  | 0.0397  | 0.0600  | 0.0105  | 0.0098  | 0.0102  |
| 97(C ) | -0.1386 | -0.1518 | -0.1128 | 0.0259  | 0.0132  | 0.0195  |
| 98(H ) | 0.0428  | 0.0363  | 0.0524  | 0.0095  | 0.0065  | 0.0080  |
| 99(H ) | 0.0559  | 0.0392  | 0.0734  | 0.0174  | 0.0167  | 0.0171  |

[Zr]-[BVPE]-PP<sub>1</sub>

Condensed local electrophilicity/nucleophilicity index (e\*eV)

| Atom   | Electrophilicity | Nucleophilicity |
|--------|------------------|-----------------|
| 1(C )  | 0.08364          | 0.01317         |
| 2(C )  | 0.05649          | 0.12207         |
| 3(C )  | 0.00399          | 0.06367         |
| 4(C )  | 0.02521          | 0.00480         |
| 5(C )  | 0.07830          | 0.02162         |
| 6(C )  | 0.02476          | 0.00125         |
| 7(Zr)  | 0.85441          | 0.00627         |
| 8(C )  | 0.06048          | 0.01533         |
| 9(C )  | 0.03412          | 0.00540         |
| 10(C ) | 0.05953          | 0.00712         |
| 11(C ) | 0.03071          | 0.00504         |
| 12(C ) | 0.07296          | 0.02014         |
| 13(Si) | 0.03171          | 0.00598         |
| 14(C ) | 0.02499          | 0.00509         |
| 15(C ) | 0.03242          | 0.00638         |
| 16(C ) | 0.10438          | 0.01442         |
| 17(C ) | 0.02595          | 0.01569         |
| 18(C ) | 0.08262          | 0.01764         |
| 19(C ) | 0.16067          | 0.01453         |
| 20(C ) | 0.04186          | 0.00368         |
| 21(C ) | 0.03295          | 0.00458         |
| 22(C ) | -0.03598         | -0.00171        |
| 23(C ) | 0.05488          | 0.02832         |
| 24(C ) | 0.01394          | 0.04373         |
| 25(C ) | 0.07382          | 0.03651         |
| 26(C ) | 0.11619          | 0.02728         |
| 27(C ) | -0.02753         | 0.01043         |
| 28(C ) | 0.01678          | 0.00665         |
| 29(C ) | 0.05749          | 0.01348         |
| 30(C ) | 0.09109          | 0.02146         |
| 31(C ) | 0.01309          | 0.00245         |
| 32(C ) | 0.05364          | 0.01063         |
| 33(C ) | -0.01543         | 0.00941         |
| 34(C ) | 0.03195          | 0.01504         |
| 35(C ) | 0.08435          | 0.03659         |
| 36(C ) | 0.03638          | 0.02049         |
| 37(C ) | 0.06840          | 0.02248         |
| 38(C ) | 0.01677          | 0.00223         |
| 39(C ) | 0.00094          | 0.00044         |
| 40(C ) | 0.00939          | 0.00132         |
| 41(C ) | 0.05231          | 0.00540         |

|        |          |          |
|--------|----------|----------|
| 42(C ) | 0.02190  | 0.00593  |
| 43(C ) | 0.04445  | 0.00573  |
| 44(C ) | 0.11615  | 0.00530  |
| 45(C ) | 0.07424  | 0.01144  |
| 46(C ) | 0.12408  | 0.00683  |
| 47(C ) | 0.01686  | 0.00370  |
| 48(H ) | 0.04615  | 0.00641  |
| 49(H ) | 0.05302  | 0.00961  |
| 50(H ) | 0.05062  | 0.00827  |
| 51(H ) | 0.00598  | 0.00036  |
| 52(H ) | 0.04863  | 0.01014  |
| 53(H ) | 0.04971  | 0.00871  |
| 54(H ) | 0.04839  | 0.01124  |
| 55(H ) | 0.01944  | 0.00278  |
| 56(H ) | 0.04147  | 0.00744  |
| 57(H ) | 0.07173  | 0.01106  |
| 58(H ) | 0.09142  | 0.00936  |
| 59(H ) | 0.03200  | 0.01590  |
| 60(H ) | 0.06015  | 0.01759  |
| 61(H ) | 0.07610  | 0.01950  |
| 62(H ) | 0.01214  | 0.00424  |
| 63(H ) | 0.04961  | 0.01119  |
| 64(H ) | 0.06073  | 0.01310  |
| 65(H ) | 0.00569  | -0.00048 |
| 66(H ) | 0.04657  | 0.00846  |
| 67(H ) | -0.02211 | 0.00117  |
| 68(H ) | 0.02605  | 0.00919  |
| 69(H ) | 0.05735  | 0.01844  |
| 70(H ) | 0.02680  | 0.01199  |
| 71(H ) | 0.05448  | 0.01739  |
| 72(H ) | 0.04086  | -0.00031 |
| 73(H ) | 0.02636  | 0.00363  |
| 74(H ) | 0.09249  | 0.00999  |
| 75(H ) | 0.02672  | 0.00324  |
| 76(H ) | 0.03571  | 0.00437  |
| 77(H ) | 0.07587  | 0.01302  |
| 78(H ) | 0.01725  | -0.00185 |
| 79(H ) | -0.01316 | -0.00326 |
| 80(H ) | 0.00885  | 0.00337  |
| 81(H ) | 0.01322  | 0.00471  |
| 82(H ) | 0.03712  | 0.00346  |
| 83(H ) | 0.05276  | 0.00809  |
| 84(H ) | 0.07817  | 0.00692  |
| 85(H ) | 0.03748  | 0.00692  |

|         |          |          |
|---------|----------|----------|
| 86(H )  | 0.06561  | 0.01004  |
| 87(C )  | 0.01026  | 0.00127  |
| 88(H )  | 0.04592  | 0.00930  |
| 89(H )  | 0.00699  | 0.00128  |
| 90(H )  | 0.01381  | 0.00396  |
| 91(H )  | 0.02695  | 0.00534  |
| 92(H )  | 0.04852  | 0.01013  |
| 93(H )  | -0.00321 | -0.00340 |
| 94(H )  | -0.00158 | -0.00234 |
| 95(C )  | 0.01480  | 0.00750  |
| 96(H )  | 0.03721  | 0.00496  |
| 97(C )  | 0.00061  | 0.00921  |
| 98(H )  | -0.01449 | 0.01168  |
| 99(H )  | 0.04945  | 0.00745  |
| 100(H ) | 0.00266  | 0.01435  |
| 101(C ) | -0.03863 | 0.06163  |
| 102(C ) | -0.01272 | 0.03095  |
| 103(C ) | 0.00147  | 0.03684  |
| 104(C ) | 0.01633  | 0.04302  |
| 105(H ) | -0.01492 | 0.02206  |
| 106(C ) | 0.02356  | 0.04681  |
| 107(H ) | 0.00061  | 0.02533  |
| 108(C ) | 0.03538  | 0.04792  |
| 109(H ) | 0.01650  | 0.02203  |
| 110(H ) | 0.02487  | 0.02756  |
| 111(C ) | 0.06665  | 0.00811  |
| 112(H ) | 0.01694  | 0.03098  |
| 113(C ) | 0.06728  | 0.02543  |
| 114(H ) | 0.03316  | 0.04429  |
| 115(H ) | 0.01349  | 0.03431  |

Hirshfeld charges, condensed Fukui functions, Units used below are "e" (elementary charge)

| Atom   | q(N)    | q(N+1)  | q(N-1)  | f-     | f+     | f0     |
|--------|---------|---------|---------|--------|--------|--------|
| 1(C )  | -0.1313 | -0.1476 | -0.1232 | 0.0081 | 0.0163 | 0.0122 |
| 2(C )  | -0.0777 | -0.0887 | -0.0023 | 0.0754 | 0.0110 | 0.0432 |
| 3(C )  | -0.0392 | -0.0400 | 0.0001  | 0.0393 | 0.0008 | 0.0201 |
| 4(C )  | -0.0232 | -0.0281 | -0.0202 | 0.0030 | 0.0049 | 0.0039 |
| 5(C )  | -0.0559 | -0.0712 | -0.0425 | 0.0134 | 0.0153 | 0.0143 |
| 6(C )  | -0.0023 | -0.0071 | -0.0015 | 0.0008 | 0.0048 | 0.0028 |
| 7(Zr)  | 0.5074  | 0.3408  | 0.5113  | 0.0039 | 0.1666 | 0.0852 |
| 8(C )  | -0.1382 | -0.1499 | -0.1287 | 0.0095 | 0.0118 | 0.0106 |
| 9(C )  | -0.0274 | -0.0340 | -0.0240 | 0.0033 | 0.0067 | 0.0050 |
| 10(C ) | 0.0045  | -0.0071 | 0.0089  | 0.0044 | 0.0116 | 0.0080 |
| 11(C ) | -0.0132 | -0.0192 | -0.0101 | 0.0031 | 0.0060 | 0.0046 |

|        |         |         |         |         |         |         |
|--------|---------|---------|---------|---------|---------|---------|
| 12(C ) | -0.0568 | -0.0710 | -0.0444 | 0.0124  | 0.0142  | 0.0133  |
| 13(Si) | 0.3745  | 0.3683  | 0.3782  | 0.0037  | 0.0062  | 0.0049  |
| 14(C ) | -0.1714 | -0.1762 | -0.1682 | 0.0031  | 0.0049  | 0.0040  |
| 15(C ) | -0.1695 | -0.1758 | -0.1655 | 0.0039  | 0.0063  | 0.0051  |
| 16(C ) | 0.0228  | 0.0024  | 0.0317  | 0.0089  | 0.0204  | 0.0146  |
| 17(C ) | -0.0271 | -0.0322 | -0.0174 | 0.0097  | 0.0051  | 0.0074  |
| 18(C ) | -0.0267 | -0.0428 | -0.0158 | 0.0109  | 0.0161  | 0.0135  |
| 19(C ) | -0.0234 | -0.0547 | -0.0144 | 0.0090  | 0.0313  | 0.0202  |
| 20(C ) | -0.0686 | -0.0767 | -0.0663 | 0.0023  | 0.0082  | 0.0052  |
| 21(C ) | -0.0704 | -0.0768 | -0.0675 | 0.0028  | 0.0064  | 0.0046  |
| 22(C ) | -0.0030 | 0.0040  | -0.0041 | -0.0011 | -0.0070 | -0.0040 |
| 23(C ) | 0.0173  | 0.0066  | 0.0348  | 0.0175  | 0.0107  | 0.0141  |
| 24(C ) | -0.0301 | -0.0328 | -0.0031 | 0.0270  | 0.0027  | 0.0149  |
| 25(C ) | -0.0266 | -0.0410 | -0.0040 | 0.0226  | 0.0144  | 0.0185  |
| 26(C ) | -0.0272 | -0.0498 | -0.0103 | 0.0169  | 0.0227  | 0.0198  |
| 27(C ) | -0.0028 | 0.0026  | 0.0036  | 0.0064  | -0.0054 | 0.0005  |
| 28(C ) | -0.0368 | -0.0401 | -0.0327 | 0.0041  | 0.0033  | 0.0037  |
| 29(C ) | -0.0312 | -0.0424 | -0.0228 | 0.0083  | 0.0112  | 0.0098  |
| 30(C ) | -0.0254 | -0.0432 | -0.0121 | 0.0133  | 0.0178  | 0.0155  |
| 31(C ) | -0.0377 | -0.0402 | -0.0362 | 0.0015  | 0.0026  | 0.0020  |
| 32(C ) | -0.0307 | -0.0411 | -0.0241 | 0.0066  | 0.0105  | 0.0085  |
| 33(C ) | -0.0476 | -0.0446 | -0.0418 | 0.0058  | -0.0030 | 0.0014  |
| 34(C ) | -0.0382 | -0.0444 | -0.0289 | 0.0093  | 0.0062  | 0.0078  |
| 35(C ) | -0.0282 | -0.0447 | -0.0056 | 0.0226  | 0.0164  | 0.0195  |
| 36(C ) | -0.0345 | -0.0416 | -0.0218 | 0.0127  | 0.0071  | 0.0099  |
| 37(C ) | -0.0306 | -0.0439 | -0.0167 | 0.0139  | 0.0133  | 0.0136  |
| 38(C ) | -0.0473 | -0.0506 | -0.0460 | 0.0014  | 0.0033  | 0.0023  |
| 39(C ) | -0.0462 | -0.0464 | -0.0459 | 0.0003  | 0.0002  | 0.0002  |
| 40(C ) | -0.0107 | -0.0125 | -0.0099 | 0.0008  | 0.0018  | 0.0013  |
| 41(C ) | 0.0091  | -0.0011 | 0.0124  | 0.0033  | 0.0102  | 0.0068  |
| 42(C ) | -0.0766 | -0.0809 | -0.0729 | 0.0037  | 0.0043  | 0.0040  |
| 43(C ) | -0.0213 | -0.0299 | -0.0177 | 0.0035  | 0.0087  | 0.0061  |
| 44(C ) | 0.0112  | -0.0115 | 0.0144  | 0.0033  | 0.0226  | 0.0130  |
| 45(C ) | -0.0212 | -0.0357 | -0.0141 | 0.0071  | 0.0145  | 0.0108  |
| 46(C ) | -0.0105 | -0.0347 | -0.0063 | 0.0042  | 0.0242  | 0.0142  |
| 47(C ) | -0.0852 | -0.0885 | -0.0830 | 0.0023  | 0.0033  | 0.0028  |
| 48(H ) | 0.0521  | 0.0431  | 0.0561  | 0.0040  | 0.0090  | 0.0065  |
| 49(H ) | 0.0576  | 0.0473  | 0.0636  | 0.0059  | 0.0103  | 0.0081  |
| 50(H ) | 0.0472  | 0.0374  | 0.0523  | 0.0051  | 0.0099  | 0.0075  |
| 51(H ) | 0.0350  | 0.0338  | 0.0352  | 0.0002  | 0.0012  | 0.0007  |
| 52(H ) | 0.0474  | 0.0380  | 0.0537  | 0.0063  | 0.0095  | 0.0079  |
| 53(H ) | 0.0484  | 0.0387  | 0.0537  | 0.0054  | 0.0097  | 0.0075  |
| 54(H ) | 0.0476  | 0.0382  | 0.0546  | 0.0069  | 0.0094  | 0.0082  |
| 55(H ) | 0.0383  | 0.0345  | 0.0400  | 0.0017  | 0.0038  | 0.0028  |

|        |         |         |         |         |         |         |
|--------|---------|---------|---------|---------|---------|---------|
| 56(H ) | 0.0515  | 0.0434  | 0.0561  | 0.0046  | 0.0081  | 0.0063  |
| 57(H ) | 0.0546  | 0.0406  | 0.0615  | 0.0068  | 0.0140  | 0.0104  |
| 58(H ) | 0.0576  | 0.0398  | 0.0634  | 0.0058  | 0.0178  | 0.0118  |
| 59(H ) | 0.0470  | 0.0408  | 0.0569  | 0.0098  | 0.0062  | 0.0080  |
| 60(H ) | 0.0507  | 0.0390  | 0.0616  | 0.0109  | 0.0117  | 0.0113  |
| 61(H ) | 0.0556  | 0.0407  | 0.0676  | 0.0120  | 0.0148  | 0.0134  |
| 62(H ) | 0.0447  | 0.0423  | 0.0473  | 0.0026  | 0.0024  | 0.0025  |
| 63(H ) | 0.0536  | 0.0439  | 0.0605  | 0.0069  | 0.0097  | 0.0083  |
| 64(H ) | 0.0556  | 0.0438  | 0.0637  | 0.0081  | 0.0118  | 0.0100  |
| 65(H ) | 0.0427  | 0.0416  | 0.0424  | -0.0003 | 0.0011  | 0.0004  |
| 66(H ) | 0.0537  | 0.0446  | 0.0589  | 0.0052  | 0.0091  | 0.0072  |
| 67(H ) | 0.0268  | 0.0312  | 0.0276  | 0.0007  | -0.0043 | -0.0018 |
| 68(H ) | 0.0463  | 0.0412  | 0.0520  | 0.0057  | 0.0051  | 0.0054  |
| 69(H ) | 0.0541  | 0.0429  | 0.0655  | 0.0114  | 0.0112  | 0.0113  |
| 70(H ) | 0.0449  | 0.0397  | 0.0523  | 0.0074  | 0.0052  | 0.0063  |
| 71(H ) | 0.0537  | 0.0431  | 0.0645  | 0.0107  | 0.0106  | 0.0107  |
| 72(H ) | 0.0450  | 0.0370  | 0.0448  | -0.0002 | 0.0080  | 0.0039  |
| 73(H ) | 0.0366  | 0.0315  | 0.0389  | 0.0022  | 0.0051  | 0.0037  |
| 74(H ) | 0.0532  | 0.0352  | 0.0594  | 0.0062  | 0.0180  | 0.0121  |
| 75(H ) | 0.0439  | 0.0387  | 0.0459  | 0.0020  | 0.0052  | 0.0036  |
| 76(H ) | 0.0397  | 0.0327  | 0.0424  | 0.0027  | 0.0070  | 0.0048  |
| 77(H ) | 0.0522  | 0.0375  | 0.0603  | 0.0080  | 0.0148  | 0.0114  |
| 78(H ) | 0.0257  | 0.0223  | 0.0246  | -0.0011 | 0.0034  | 0.0011  |
| 79(H ) | 0.0205  | 0.0231  | 0.0185  | -0.0020 | -0.0026 | -0.0023 |
| 80(H ) | 0.0258  | 0.0240  | 0.0279  | 0.0021  | 0.0017  | 0.0019  |
| 81(H ) | 0.0331  | 0.0305  | 0.0360  | 0.0029  | 0.0026  | 0.0027  |
| 82(H ) | 0.0471  | 0.0398  | 0.0492  | 0.0021  | 0.0072  | 0.0047  |
| 83(H ) | 0.0543  | 0.0440  | 0.0593  | 0.0050  | 0.0103  | 0.0076  |
| 84(H ) | 0.0559  | 0.0407  | 0.0602  | 0.0043  | 0.0152  | 0.0098  |
| 85(H ) | 0.0304  | 0.0231  | 0.0347  | 0.0043  | 0.0073  | 0.0058  |
| 86(H ) | 0.0311  | 0.0183  | 0.0373  | 0.0062  | 0.0128  | 0.0095  |
| 87(C ) | -0.0863 | -0.0883 | -0.0855 | 0.0008  | 0.0020  | 0.0014  |
| 88(H ) | 0.0351  | 0.0262  | 0.0408  | 0.0057  | 0.0090  | 0.0073  |
| 89(H ) | 0.0264  | 0.0250  | 0.0272  | 0.0008  | 0.0014  | 0.0011  |
| 90(H ) | 0.0292  | 0.0265  | 0.0316  | 0.0024  | 0.0027  | 0.0026  |
| 91(H ) | 0.0287  | 0.0234  | 0.0320  | 0.0033  | 0.0053  | 0.0043  |
| 92(H ) | 0.0350  | 0.0255  | 0.0412  | 0.0063  | 0.0095  | 0.0079  |
| 93(H ) | 0.0289  | 0.0295  | 0.0268  | -0.0021 | -0.0006 | -0.0014 |
| 94(H ) | 0.0241  | 0.0244  | 0.0226  | -0.0014 | -0.0003 | -0.0009 |
| 95(C ) | -0.0418 | -0.0447 | -0.0372 | 0.0046  | 0.0029  | 0.0038  |
| 96(H ) | 0.0389  | 0.0316  | 0.0419  | 0.0031  | 0.0073  | 0.0052  |
| 97(C ) | -0.0441 | -0.0442 | -0.0384 | 0.0057  | 0.0001  | 0.0029  |
| 98(H ) | 0.0291  | 0.0320  | 0.0363  | 0.0072  | -0.0028 | 0.0022  |
| 99(H ) | 0.0423  | 0.0327  | 0.0469  | 0.0046  | 0.0096  | 0.0071  |



|         |         |         |         |        |         |        |
|---------|---------|---------|---------|--------|---------|--------|
| 100(H ) | 0.0332  | 0.0327  | 0.0421  | 0.0089 | 0.0005  | 0.0047 |
| 101(C ) | -0.0032 | 0.0043  | 0.0348  | 0.0381 | -0.0075 | 0.0153 |
| 102(C ) | -0.0482 | -0.0457 | -0.0290 | 0.0191 | -0.0025 | 0.0083 |
| 103(C ) | -0.0469 | -0.0472 | -0.0242 | 0.0228 | 0.0003  | 0.0115 |
| 104(C ) | -0.0356 | -0.0388 | -0.0090 | 0.0266 | 0.0032  | 0.0149 |
| 105(H ) | 0.0376  | 0.0405  | 0.0513  | 0.0136 | -0.0029 | 0.0054 |
| 106(C ) | -0.0374 | -0.0419 | -0.0084 | 0.0289 | 0.0046  | 0.0168 |
| 107(H ) | 0.0412  | 0.0411  | 0.0568  | 0.0156 | 0.0001  | 0.0079 |
| 108(C ) | 0.0020  | -0.0049 | 0.0316  | 0.0296 | 0.0069  | 0.0183 |
| 109(H ) | 0.0454  | 0.0422  | 0.0591  | 0.0136 | 0.0032  | 0.0084 |
| 110(H ) | 0.0458  | 0.0409  | 0.0628  | 0.0170 | 0.0048  | 0.0109 |
| 111(C ) | -0.0084 | -0.0214 | -0.0034 | 0.0050 | 0.0130  | 0.0090 |
| 112(H ) | 0.0433  | 0.0400  | 0.0625  | 0.0191 | 0.0033  | 0.0112 |
| 113(C ) | -0.1391 | -0.1522 | -0.1234 | 0.0157 | 0.0131  | 0.0144 |
| 114(H ) | 0.0477  | 0.0412  | 0.0751  | 0.0274 | 0.0065  | 0.0169 |
| 115(H ) | 0.0412  | 0.0385  | 0.0624  | 0.0212 | 0.0026  | 0.0119 |

# [Zr]-H

## Condensed local electrophilicity/nucleophilicity index (e\*eV)

| Atom   | Electrophilicity | Nucleophilicity |
|--------|------------------|-----------------|
| 1(C )  | 0.10665          | 0.00985         |
| 2(C )  | 0.09059          | 0.00639         |
| 3(C )  | 0.02700          | 0.00366         |
| 4(C )  | 0.11487          | 0.01621         |
| 5(C )  | 0.03910          | 0.00289         |
| 6(Zr)  | 1.29771          | 0.01250         |
| 7(C )  | 0.08619          | 0.01278         |
| 8(C )  | 0.03523          | 0.00325         |
| 9(C )  | 0.05287          | 0.00620         |
| 10(C ) | 0.04867          | 0.00246         |
| 11(C ) | 0.08574          | 0.01478         |
| 12(Si) | 0.04355          | 0.00353         |
| 13(C ) | 0.03364          | 0.00333         |
| 14(C ) | 0.03516          | 0.00340         |
| 15(C ) | 0.09036          | 0.01478         |
| 16(C ) | 0.05151          | 0.02323         |
| 17(C ) | 0.12754          | 0.01861         |
| 18(C ) | 0.15604          | 0.01454         |
| 19(C ) | 0.04260          | 0.00354         |
| 20(C ) | 0.03726          | 0.00358         |
| 21(C ) | -0.04877         | 0.00945         |
| 22(C ) | 0.06316          | 0.01225         |
| 23(C ) | 0.06598          | 0.01839         |

|        |          |         |
|--------|----------|---------|
| 24(C ) | 0.13113  | 0.01452 |
| 25(C ) | 0.13792  | 0.01583 |
| 26(C ) | -0.04532 | 0.00723 |
| 27(C ) | 0.01015  | 0.01070 |
| 28(C ) | 0.06175  | 0.01234 |
| 29(C ) | 0.09835  | 0.02450 |
| 30(C ) | 0.01228  | 0.00914 |
| 31(C ) | 0.06232  | 0.01358 |
| 32(C ) | -0.02174 | 0.00556 |
| 33(C ) | 0.05064  | 0.00952 |
| 34(C ) | 0.10501  | 0.02104 |
| 35(C ) | 0.04414  | 0.01015 |
| 36(C ) | 0.08525  | 0.01289 |
| 37(H ) | 0.08150  | 0.00695 |
| 38(H ) | 0.07210  | 0.00693 |
| 39(H ) | 0.06148  | 0.00620 |
| 40(H ) | 0.01485  | 0.00118 |
| 41(H ) | 0.05679  | 0.00477 |
| 42(H ) | 0.05568  | 0.00521 |
| 43(H ) | 0.06278  | 0.00576 |
| 44(H ) | 0.01575  | 0.00134 |
| 45(H ) | 0.05361  | 0.00904 |
| 46(H ) | 0.09066  | 0.00980 |
| 47(H ) | 0.10019  | 0.01033 |
| 48(H ) | 0.06136  | 0.00787 |
| 49(H ) | 0.09167  | 0.00847 |
| 50(H ) | 0.09961  | 0.00997 |
| 51(H ) | 0.00985  | 0.00575 |
| 52(H ) | 0.05396  | 0.00934 |
| 53(H ) | 0.06674  | 0.01161 |
| 54(H ) | 0.00934  | 0.00549 |
| 55(H ) | 0.05368  | 0.00928 |
| 56(H ) | -0.02874 | 0.00126 |
| 57(H ) | 0.04232  | 0.00667 |
| 58(H ) | 0.07097  | 0.01031 |
| 59(H ) | 0.03379  | 0.00636 |
| 60(H ) | 0.06702  | 0.00915 |
| 61(H ) | 0.05791  | 0.00441 |
| 62(H ) | 0.02964  | 0.00199 |
| 63(H ) | 0.09389  | 0.00709 |
| 64(H ) | 0.04883  | 0.00430 |
| 65(H ) | 0.02535  | 0.00257 |
| 66(H ) | 0.09278  | 0.00717 |
| 67(H ) | 0.19935  | 0.00496 |

Hirshfeld charges, condensed Fukui functions, Units used below are "e" (elementary charge)

| Atom   | q(N)    | q(N+1)  | q(N-1)  | f-     | f+      | f0     |
|--------|---------|---------|---------|--------|---------|--------|
| 1(C )  | -0.1299 | -0.1502 | -0.1132 | 0.0167 | 0.0203  | 0.0185 |
| 2(C )  | 0.0155  | -0.0017 | 0.0264  | 0.0109 | 0.0172  | 0.0140 |
| 3(C )  | -0.0258 | -0.0310 | -0.0196 | 0.0062 | 0.0051  | 0.0057 |
| 4(C )  | -0.0496 | -0.0714 | -0.0220 | 0.0276 | 0.0218  | 0.0247 |
| 5(C )  | -0.0217 | -0.0291 | -0.0168 | 0.0049 | 0.0074  | 0.0062 |
| 6(Zr)  | 0.5701  | 0.3234  | 0.5914  | 0.0213 | 0.2467  | 0.1340 |
| 7(C )  | -0.1347 | -0.1511 | -0.1130 | 0.0217 | 0.0164  | 0.0191 |
| 8(C )  | -0.0191 | -0.0258 | -0.0135 | 0.0055 | 0.0067  | 0.0061 |
| 9(C )  | 0.0012  | -0.0089 | 0.0117  | 0.0105 | 0.0101  | 0.0103 |
| 10(C ) | -0.0090 | -0.0182 | -0.0048 | 0.0042 | 0.0093  | 0.0067 |
| 11(C ) | -0.0660 | -0.0823 | -0.0408 | 0.0251 | 0.0163  | 0.0207 |
| 12(Si) | 0.3788  | 0.3706  | 0.3848  | 0.0060 | 0.0083  | 0.0071 |
| 13(C ) | -0.1696 | -0.1760 | -0.1640 | 0.0057 | 0.0064  | 0.0060 |
| 14(C ) | -0.1701 | -0.1768 | -0.1643 | 0.0058 | 0.0067  | 0.0062 |
| 15(C ) | 0.0285  | 0.0113  | 0.0536  | 0.0251 | 0.0172  | 0.0212 |
| 16(C ) | -0.0195 | -0.0293 | 0.0200  | 0.0395 | 0.0098  | 0.0246 |
| 17(C ) | -0.0186 | -0.0429 | 0.0130  | 0.0316 | 0.0242  | 0.0279 |
| 18(C ) | -0.0124 | -0.0421 | 0.0123  | 0.0247 | 0.0297  | 0.0272 |
| 19(C ) | -0.0652 | -0.0733 | -0.0592 | 0.0060 | 0.0081  | 0.0071 |
| 20(C ) | -0.0686 | -0.0757 | -0.0625 | 0.0061 | 0.0071  | 0.0066 |
| 21(C ) | -0.0040 | 0.0053  | 0.0121  | 0.0161 | -0.0093 | 0.0034 |
| 22(C ) | 0.0172  | 0.0052  | 0.0380  | 0.0208 | 0.0120  | 0.0164 |
| 23(C ) | -0.0225 | -0.0351 | 0.0087  | 0.0313 | 0.0125  | 0.0219 |
| 24(C ) | -0.0239 | -0.0488 | 0.0008  | 0.0247 | 0.0249  | 0.0248 |
| 25(C ) | -0.0228 | -0.0490 | 0.0041  | 0.0269 | 0.0262  | 0.0266 |
| 26(C ) | -0.0056 | 0.0030  | 0.0067  | 0.0123 | -0.0086 | 0.0018 |
| 27(C ) | -0.0391 | -0.0410 | -0.0209 | 0.0182 | 0.0019  | 0.0101 |
| 28(C ) | -0.0316 | -0.0434 | -0.0107 | 0.0210 | 0.0117  | 0.0164 |
| 29(C ) | -0.0253 | -0.0440 | 0.0164  | 0.0417 | 0.0187  | 0.0302 |
| 30(C ) | -0.0362 | -0.0386 | -0.0207 | 0.0155 | 0.0023  | 0.0089 |
| 31(C ) | -0.0301 | -0.0420 | -0.0071 | 0.0231 | 0.0118  | 0.0175 |
| 32(C ) | -0.0406 | -0.0364 | -0.0311 | 0.0095 | -0.0041 | 0.0027 |
| 33(C ) | -0.0302 | -0.0399 | -0.0140 | 0.0162 | 0.0096  | 0.0129 |
| 34(C ) | -0.0225 | -0.0425 | 0.0133  | 0.0358 | 0.0200  | 0.0279 |
| 35(C ) | -0.0328 | -0.0412 | -0.0155 | 0.0173 | 0.0084  | 0.0128 |
| 36(C ) | -0.0257 | -0.0419 | -0.0038 | 0.0219 | 0.0162  | 0.0191 |
| 37(H ) | 0.0652  | 0.0497  | 0.0771  | 0.0118 | 0.0155  | 0.0137 |
| 38(H ) | 0.0594  | 0.0457  | 0.0712  | 0.0118 | 0.0137  | 0.0127 |
| 39(H ) | 0.0500  | 0.0383  | 0.0605  | 0.0105 | 0.0117  | 0.0111 |
| 40(H ) | 0.0385  | 0.0357  | 0.0405  | 0.0020 | 0.0028  | 0.0024 |

|        |         |         |         |        |         |         |
|--------|---------|---------|---------|--------|---------|---------|
| 41(H ) | 0.0492  | 0.0384  | 0.0573  | 0.0081 | 0.0108  | 0.0095  |
| 42(H ) | 0.0490  | 0.0384  | 0.0579  | 0.0089 | 0.0106  | 0.0097  |
| 43(H ) | 0.0501  | 0.0381  | 0.0599  | 0.0098 | 0.0119  | 0.0109  |
| 44(H ) | 0.0374  | 0.0344  | 0.0397  | 0.0023 | 0.0030  | 0.0026  |
| 45(H ) | 0.0530  | 0.0428  | 0.0684  | 0.0154 | 0.0102  | 0.0128  |
| 46(H ) | 0.0572  | 0.0400  | 0.0739  | 0.0167 | 0.0172  | 0.0169  |
| 47(H ) | 0.0611  | 0.0420  | 0.0786  | 0.0176 | 0.0190  | 0.0183  |
| 48(H ) | 0.0553  | 0.0436  | 0.0687  | 0.0134 | 0.0117  | 0.0125  |
| 49(H ) | 0.0567  | 0.0393  | 0.0711  | 0.0144 | 0.0174  | 0.0159  |
| 50(H ) | 0.0608  | 0.0419  | 0.0778  | 0.0169 | 0.0189  | 0.0179  |
| 51(H ) | 0.0440  | 0.0421  | 0.0538  | 0.0098 | 0.0019  | 0.0058  |
| 52(H ) | 0.0536  | 0.0433  | 0.0695  | 0.0159 | 0.0103  | 0.0131  |
| 53(H ) | 0.0559  | 0.0432  | 0.0757  | 0.0197 | 0.0127  | 0.0162  |
| 54(H ) | 0.0460  | 0.0443  | 0.0554  | 0.0093 | 0.0018  | 0.0056  |
| 55(H ) | 0.0543  | 0.0441  | 0.0700  | 0.0158 | 0.0102  | 0.0130  |
| 56(H ) | 0.0384  | 0.0439  | 0.0406  | 0.0021 | -0.0055 | -0.0017 |
| 57(H ) | 0.0539  | 0.0459  | 0.0653  | 0.0113 | 0.0080  | 0.0097  |
| 58(H ) | 0.0574  | 0.0439  | 0.0749  | 0.0175 | 0.0135  | 0.0155  |
| 59(H ) | 0.0481  | 0.0416  | 0.0589  | 0.0108 | 0.0064  | 0.0086  |
| 60(H ) | 0.0569  | 0.0441  | 0.0724  | 0.0156 | 0.0127  | 0.0142  |
| 61(H ) | 0.0528  | 0.0418  | 0.0603  | 0.0075 | 0.0110  | 0.0093  |
| 62(H ) | 0.0401  | 0.0345  | 0.0435  | 0.0034 | 0.0056  | 0.0045  |
| 63(H ) | 0.0541  | 0.0362  | 0.0661  | 0.0121 | 0.0179  | 0.0150  |
| 64(H ) | 0.0486  | 0.0393  | 0.0559  | 0.0073 | 0.0093  | 0.0083  |
| 65(H ) | 0.0365  | 0.0317  | 0.0408  | 0.0044 | 0.0048  | 0.0046  |
| 66(H ) | 0.0562  | 0.0386  | 0.0684  | 0.0122 | 0.0176  | 0.0149  |
| 67(H ) | -0.1781 | -0.2160 | -0.1697 | 0.0084 | 0.0379  | 0.0232  |

## DVB-PP<sub>1</sub>

Condensed local electrophilicity/nucleophilicity index (e\*eV)

| Atom   | Electrophilicity | Nucleophilicity |
|--------|------------------|-----------------|
| 1(C )  | 0.00954          | 0.05736         |
| 2(C )  | 0.08714          | 0.47297         |
| 3(C )  | 0.05072          | 0.22136         |
| 4(C )  | 0.00121          | 0.00729         |
| 5(C )  | 0.05468          | 0.30856         |
| 6(C )  | 0.02698          | 0.17169         |
| 7(C )  | 0.03416          | 0.16473         |
| 8(C )  | 0.03809          | 0.23827         |
| 9(C )  | 0.03367          | 0.18262         |
| 10(C ) | 0.03414          | 0.20573         |
| 11(C ) | 0.00289          | 0.01659         |
| 12(H ) | 0.00260          | 0.01801         |

|        |          |          |
|--------|----------|----------|
| 13(H ) | 0.00368  | 0.02074  |
| 14(H ) | 0.00358  | 0.01892  |
| 15(H ) | 0.02032  | 0.11273  |
| 16(H ) | 0.01823  | 0.09279  |
| 17(H ) | 0.02065  | 0.10929  |
| 18(H ) | 0.02059  | 0.11522  |
| 19(H ) | 0.01719  | 0.10329  |
| 20(H ) | 0.00319  | 0.02149  |
| 21(C ) | 0.00122  | 0.00749  |
| 22(H ) | 0.00567  | 0.03191  |
| 23(H ) | 0.00290  | 0.01653  |
| 24(H ) | 0.00246  | 0.01408  |
| 25(H ) | 0.00152  | 0.00956  |
| 26(H ) | 0.00589  | 0.03320  |
| 27(H ) | -0.00205 | -0.01092 |
| 28(H ) | 0.00226  | 0.01310  |
| 29(C ) | 0.00270  | 0.01410  |
| 30(H ) | 0.02457  | 0.11468  |
| 31(C ) | 0.00188  | 0.01077  |
| 32(H ) | 0.02863  | 0.13491  |
| 33(H ) | 0.03557  | 0.16930  |
| 34(H ) | 0.01493  | 0.09218  |

Hirshfeld charges, condensed Fukui functions, Units used below are "e" (elementary charge)

| Atom   | q(N)    | q(N+1)  | q(N-1)  | f-     | f+     | f0     |
|--------|---------|---------|---------|--------|--------|--------|
| 1(C )  | -0.0441 | -0.0597 | -0.0267 | 0.0173 | 0.0156 | 0.0165 |
| 2(C )  | -0.0480 | -0.0511 | -0.0447 | 0.0033 | 0.0031 | 0.0032 |
| 3(C )  | -0.0481 | -0.0525 | -0.0438 | 0.0043 | 0.0044 | 0.0043 |
| 4(C )  | -0.0119 | -0.0139 | -0.0097 | 0.0022 | 0.0020 | 0.0021 |
| 5(C )  | 0.0039  | -0.0855 | 0.0971  | 0.0932 | 0.0894 | 0.0913 |
| 6(C )  | -0.0472 | -0.0913 | 0.0047  | 0.0519 | 0.0441 | 0.0480 |
| 7(C )  | -0.0397 | -0.0955 | 0.0101  | 0.0498 | 0.0559 | 0.0528 |
| 8(C )  | -0.0067 | -0.0690 | 0.0653  | 0.0720 | 0.0623 | 0.0671 |
| 9(C )  | -0.0499 | -0.1050 | 0.0053  | 0.0552 | 0.0551 | 0.0551 |
| 10(C ) | -0.0430 | -0.0989 | 0.0191  | 0.0621 | 0.0558 | 0.0590 |
| 11(C ) | -0.0874 | -0.0922 | -0.0824 | 0.0050 | 0.0047 | 0.0049 |
| 12(H ) | 0.0275  | 0.0233  | 0.0330  | 0.0054 | 0.0042 | 0.0048 |
| 13(H ) | 0.0249  | 0.0189  | 0.0311  | 0.0063 | 0.0060 | 0.0061 |
| 14(H ) | 0.0255  | 0.0196  | 0.0312  | 0.0057 | 0.0059 | 0.0058 |
| 15(H ) | 0.0399  | 0.0066  | 0.0739  | 0.0340 | 0.0332 | 0.0336 |
| 16(H ) | 0.0415  | 0.0117  | 0.0695  | 0.0280 | 0.0298 | 0.0289 |
| 17(H ) | 0.0387  | 0.0049  | 0.0717  | 0.0330 | 0.0338 | 0.0334 |
| 18(H ) | 0.0397  | 0.0061  | 0.0745  | 0.0348 | 0.0337 | 0.0342 |
| 19(H ) | 0.0330  | 0.0049  | 0.0642  | 0.0312 | 0.0281 | 0.0297 |

|        |         |         |         |         |         |         |
|--------|---------|---------|---------|---------|---------|---------|
| 20(H ) | 0.0271  | 0.0219  | 0.0336  | 0.0065  | 0.0052  | 0.0059  |
| 21(C ) | -0.0880 | -0.0899 | -0.0857 | 0.0023  | 0.0020  | 0.0021  |
| 22(H ) | 0.0285  | 0.0192  | 0.0381  | 0.0096  | 0.0093  | 0.0095  |
| 23(H ) | 0.0274  | 0.0226  | 0.0324  | 0.0050  | 0.0047  | 0.0049  |
| 24(H ) | 0.0281  | 0.0241  | 0.0324  | 0.0043  | 0.0040  | 0.0041  |
| 25(H ) | 0.0249  | 0.0224  | 0.0278  | 0.0029  | 0.0025  | 0.0027  |
| 26(H ) | 0.0289  | 0.0193  | 0.0389  | 0.0100  | 0.0096  | 0.0098  |
| 27(H ) | 0.0281  | 0.0315  | 0.0248  | -0.0033 | -0.0033 | -0.0033 |
| 28(H ) | 0.0274  | 0.0237  | 0.0313  | 0.0040  | 0.0037  | 0.0038  |
| 29(C ) | -0.0402 | -0.1231 | 0.0267  | 0.0669  | 0.0830  | 0.0749  |
| 30(H ) | 0.0392  | -0.0010 | 0.0738  | 0.0346  | 0.0402  | 0.0374  |
| 31(C ) | -0.0908 | -0.2333 | 0.0520  | 0.1429  | 0.1425  | 0.1427  |
| 32(H ) | 0.0377  | -0.0091 | 0.0785  | 0.0408  | 0.0468  | 0.0438  |
| 33(H ) | 0.0405  | -0.0176 | 0.0917  | 0.0511  | 0.0582  | 0.0547  |
| 34(H ) | 0.0326  | 0.0082  | 0.0605  | 0.0278  | 0.0244  | 0.0261  |

# [BVPE]-PP<sub>1</sub>

## Condensed local electrophilicity/nucleophilicity index (e\*eV)

| Atom   | Electrophilicity | Nucleophilicity |
|--------|------------------|-----------------|
| 1(C )  | 0.00329          | 0.03158         |
| 2(C )  | 0.07020          | 0.30817         |
| 3(C )  | 0.03883          | 0.13969         |
| 4(C )  | 0.00066          | 0.00856         |
| 5(C )  | 0.03866          | 0.16628         |
| 6(C )  | 0.02143          | 0.09673         |
| 7(C )  | 0.02538          | 0.11593         |
| 8(C )  | 0.03084          | 0.14698         |
| 9(C )  | 0.02379          | 0.10096         |
| 10(C ) | 0.02880          | 0.12119         |
| 11(C ) | 0.00186          | 0.01542         |
| 12(H ) | 0.00055          | 0.01263         |
| 13(H ) | 0.00219          | 0.01715         |
| 14(H ) | 0.00234          | 0.01688         |
| 15(H ) | 0.01570          | 0.06820         |
| 16(H ) | 0.01456          | 0.06461         |
| 17(H ) | 0.01435          | 0.05876         |
| 18(H ) | 0.01709          | 0.07469         |
| 19(H ) | 0.00603          | 0.04564         |
| 20(H ) | 0.00146          | 0.01574         |
| 21(C ) | 0.00053          | 0.00500         |
| 22(H ) | 0.00347          | 0.02508         |
| 23(H ) | 0.00187          | 0.01337         |
| 24(H ) | 0.00171          | 0.01221         |

|        |          |          |
|--------|----------|----------|
| 25(H ) | 0.00070  | 0.00730  |
| 26(H ) | 0.00344  | 0.02317  |
| 27(H ) | -0.00178 | -0.00760 |
| 28(H ) | 0.00119  | 0.00910  |
| 29(C ) | 0.00170  | 0.01681  |
| 30(H ) | 0.01930  | 0.07549  |
| 31(C ) | 0.00184  | 0.02803  |
| 32(H ) | 0.02282  | 0.08839  |
| 33(H ) | 0.02878  | 0.11440  |
| 34(H ) | 0.00593  | 0.04354  |
| 35(C ) | 0.00828  | 0.03109  |
| 36(H ) | 0.01231  | 0.04726  |
| 37(H ) | 0.01219  | 0.04719  |
| 38(C ) | 0.00425  | 0.02817  |
| 39(H ) | 0.00586  | 0.04068  |
| 40(H ) | 0.00588  | 0.04121  |
| 41(C ) | 0.00808  | 0.14198  |
| 42(C ) | 0.02566  | 0.09118  |
| 43(C ) | 0.00949  | 0.08445  |
| 44(C ) | 0.01634  | 0.11178  |
| 45(H ) | 0.01180  | 0.05827  |
| 46(C ) | 0.02777  | 0.10392  |
| 47(H ) | 0.00568  | 0.04498  |
| 48(C ) | 0.01857  | 0.17456  |
| 49(H ) | 0.01162  | 0.07026  |
| 50(H ) | 0.01402  | 0.06691  |

Hirshfeld charges, condensed Fukui functions, Units used below are "e" (elementary charge)

| Atom   | q(N)    | q(N+1)  | q(N-1)  | f-     | f+     | f0     |
|--------|---------|---------|---------|--------|--------|--------|
| 1(C )  | -0.0460 | -0.0511 | -0.0363 | 0.0097 | 0.0051 | 0.0074 |
| 2(C )  | -0.0899 | -0.1984 | 0.0045  | 0.0944 | 0.1084 | 0.1014 |
| 3(C )  | -0.0400 | -0.1000 | 0.0028  | 0.0428 | 0.0600 | 0.0514 |
| 4(C )  | -0.0118 | -0.0128 | -0.0092 | 0.0026 | 0.0010 | 0.0018 |
| 5(C )  | 0.0043  | -0.0554 | 0.0552  | 0.0509 | 0.0597 | 0.0553 |
| 6(C )  | -0.0466 | -0.0797 | -0.0169 | 0.0296 | 0.0331 | 0.0314 |
| 7(C )  | -0.0390 | -0.0782 | -0.0035 | 0.0355 | 0.0392 | 0.0374 |
| 8(C )  | -0.0060 | -0.0536 | 0.0391  | 0.0450 | 0.0476 | 0.0463 |
| 9(C )  | -0.0498 | -0.0865 | -0.0188 | 0.0309 | 0.0368 | 0.0338 |
| 10(C ) | -0.0426 | -0.0871 | -0.0055 | 0.0371 | 0.0445 | 0.0408 |
| 11(C ) | -0.0877 | -0.0906 | -0.0830 | 0.0047 | 0.0029 | 0.0038 |
| 12(H ) | 0.0264  | 0.0255  | 0.0303  | 0.0039 | 0.0008 | 0.0024 |
| 13(H ) | 0.0242  | 0.0208  | 0.0295  | 0.0053 | 0.0034 | 0.0043 |
| 14(H ) | 0.0249  | 0.0213  | 0.0301  | 0.0052 | 0.0036 | 0.0044 |
| 15(H ) | 0.0404  | 0.0161  | 0.0613  | 0.0209 | 0.0243 | 0.0226 |

|        |         |         |         |         |         |         |
|--------|---------|---------|---------|---------|---------|---------|
| 16(H ) | 0.0420  | 0.0195  | 0.0618  | 0.0198  | 0.0225  | 0.0211  |
| 17(H ) | 0.0387  | 0.0165  | 0.0567  | 0.0180  | 0.0222  | 0.0201  |
| 18(H ) | 0.0402  | 0.0138  | 0.0630  | 0.0229  | 0.0264  | 0.0246  |
| 19(H ) | 0.0298  | 0.0205  | 0.0438  | 0.0140  | 0.0093  | 0.0117  |
| 20(H ) | 0.0260  | 0.0237  | 0.0308  | 0.0048  | 0.0023  | 0.0035  |
| 21(C ) | -0.0880 | -0.0888 | -0.0865 | 0.0015  | 0.0008  | 0.0012  |
| 22(H ) | 0.0282  | 0.0228  | 0.0359  | 0.0077  | 0.0054  | 0.0065  |
| 23(H ) | 0.0271  | 0.0242  | 0.0312  | 0.0041  | 0.0029  | 0.0035  |
| 24(H ) | 0.0279  | 0.0252  | 0.0316  | 0.0037  | 0.0026  | 0.0032  |
| 25(H ) | 0.0249  | 0.0239  | 0.0272  | 0.0022  | 0.0011  | 0.0017  |
| 26(H ) | 0.0286  | 0.0233  | 0.0357  | 0.0071  | 0.0053  | 0.0062  |
| 27(H ) | 0.0287  | 0.0315  | 0.0264  | -0.0023 | -0.0027 | -0.0025 |
| 28(H ) | 0.0268  | 0.0250  | 0.0296  | 0.0028  | 0.0018  | 0.0023  |
| 29(C ) | -0.0492 | -0.0519 | -0.0441 | 0.0052  | 0.0026  | 0.0039  |
| 30(H ) | 0.0395  | 0.0097  | 0.0626  | 0.0231  | 0.0298  | 0.0265  |
| 31(C ) | -0.0482 | -0.0510 | -0.0396 | 0.0086  | 0.0028  | 0.0057  |
| 32(H ) | 0.0380  | 0.0028  | 0.0651  | 0.0271  | 0.0353  | 0.0312  |
| 33(H ) | 0.0410  | -0.0035 | 0.0760  | 0.0350  | 0.0445  | 0.0398  |
| 34(H ) | 0.0301  | 0.0210  | 0.0435  | 0.0133  | 0.0092  | 0.0113  |
| 35(C ) | -0.0431 | -0.0559 | -0.0336 | 0.0095  | 0.0128  | 0.0112  |
| 36(H ) | 0.0349  | 0.0159  | 0.0494  | 0.0145  | 0.0190  | 0.0168  |
| 37(H ) | 0.0349  | 0.0161  | 0.0493  | 0.0145  | 0.0188  | 0.0166  |
| 38(C ) | -0.0435 | -0.0501 | -0.0349 | 0.0086  | 0.0066  | 0.0076  |
| 39(H ) | 0.0340  | 0.0250  | 0.0465  | 0.0125  | 0.0090  | 0.0108  |
| 40(H ) | 0.0341  | 0.0250  | 0.0467  | 0.0126  | 0.0091  | 0.0109  |
| 41(C ) | -0.0010 | -0.0135 | 0.0425  | 0.0435  | 0.0125  | 0.0280  |
| 42(C ) | -0.0492 | -0.0889 | -0.0213 | 0.0279  | 0.0396  | 0.0338  |
| 43(C ) | -0.0510 | -0.0657 | -0.0251 | 0.0259  | 0.0147  | 0.0203  |
| 44(C ) | -0.0477 | -0.0730 | -0.0135 | 0.0342  | 0.0252  | 0.0297  |
| 45(H ) | 0.0390  | 0.0207  | 0.0568  | 0.0179  | 0.0182  | 0.0180  |
| 46(C ) | -0.0488 | -0.0917 | -0.0170 | 0.0318  | 0.0429  | 0.0374  |
| 47(H ) | 0.0370  | 0.0283  | 0.0508  | 0.0138  | 0.0088  | 0.0113  |
| 48(C ) | 0.0002  | -0.0285 | 0.0536  | 0.0535  | 0.0287  | 0.0411  |
| 49(H ) | 0.0389  | 0.0210  | 0.0605  | 0.0215  | 0.0180  | 0.0197  |
| 50(H ) | 0.0383  | 0.0166  | 0.0588  | 0.0205  | 0.0217  | 0.0211  |



**Table S2: Energies and Cartesian coordinates of all the structures for the main text.**

Gibbs free energies (G) and enthalpies (H) (in *a.u.*) of all the structures for the main text

|          | <b>[Zr]-DVB-PP<sub>1</sub></b> | <b>H<sub>2</sub></b>       | <b>TS1</b>                 | <b>IM1</b>                      | <b>TS2</b>                 |
|----------|--------------------------------|----------------------------|----------------------------|---------------------------------|----------------------------|
| <b>G</b> | -2193.359353                   | -1.171228                  | -2194.515816               | -2194.513368                    | -2194.508915               |
| <b>H</b> | -2193.225599                   | -1.156436                  | -2194.37978                | -2194.379866                    | -2194.377058               |
|          | <b>IM2</b>                     | <b>DVB-PP<sub>1</sub></b>  | <b>[Zr]-H</b>              | <b>[Zr]-BVPE-PP<sub>1</sub></b> | <b>[TS1]</b>               |
| <b>G</b> | -2194.542299                   | -544.972075                | -1649.56962                | -2502.746674                    | -2503.899192               |
| <b>H</b> | -2194.405323                   | -544.911639                | -1649.472072               | -2502.594457                    | -2503.746689               |
|          | <b>[IM1]</b>                   | <b>[TS2]</b>               | <b>[IM2]</b>               | <b>BVPE-PP<sub>1</sub></b>      |                            |
| <b>G</b> | -2503.901661                   | -2503.898058               | -2503.927253               | -854.3605529                    |                            |
| <b>H</b> | -2503.748013                   | -2503.744805               | -2503.771216               | -854.2799269                    |                            |
|          | <b>IM3<sub>1,2</sub></b>       | <b>TS3<sub>1,2</sub></b>   | <b>PR3<sub>1,2</sub></b>   | <b>IM3<sub>2,1</sub></b>        | <b>TS3<sub>2,1</sub></b>   |
| <b>G</b> | -2194.546812                   | -2194.542051               | -2194.56112                | -2194.536863                    | -2194.534211               |
| <b>H</b> | -2194.410721                   | -2194.406035               | -2194.426021               | -2194.404326                    | -2194.402761               |
|          | <b>PR3<sub>2,1</sub></b>       | <b>[IM3<sub>1,2</sub>]</b> | <b>[TS3<sub>1,2</sub>]</b> | <b>[PR3<sub>1,2</sub>]</b>      | <b>[IM3<sub>2,1</sub>]</b> |
| <b>G</b> | -2194.55063                    | -2503.934614               | -2503.922543               | -2503.950246                    | -2503.923243               |
| <b>H</b> | -2194.418368                   | -2503.778545               | -2503.768083               | -2503.796347                    | -2503.770393               |
|          | <b>[TS3<sub>2,1</sub>]</b>     | <b>[PR3<sub>2,1</sub>]</b> |                            |                                 |                            |
| <b>G</b> | -2503.918592                   | -2503.938919               |                            |                                 |                            |
| <b>H</b> | -2503.767999                   | -2503.787615               |                            |                                 |                            |

**[Zr]-DVB-PP<sub>1</sub>**

|    |             |             |             |
|----|-------------|-------------|-------------|
| C  | -0.18666300 | 1.51375100  | 0.75731400  |
| C  | 0.83383800  | -2.28992200 | -1.63438300 |
| C  | 1.13220500  | -2.62891500 | -0.26667200 |
| C  | 1.60018900  | -1.07766100 | -1.91247900 |
| C  | 1.98750200  | -1.64448800 | 0.28861400  |
| C  | 2.36809000  | -0.71491000 | -0.73488700 |
| Zr | -0.36705800 | -0.59548600 | -0.34121100 |
| C  | -1.81795200 | -1.55025700 | -2.12126400 |

|    |             |             |             |
|----|-------------|-------------|-------------|
| C  | -2.61294600 | -1.59008400 | -0.90407300 |
| C  | -1.76967300 | -0.15587000 | -2.50397800 |
| C  | -3.00864600 | -0.23637200 | -0.55536100 |
| C  | -2.40513400 | 0.63162000  | -1.51695800 |
| Si | -0.61404800 | -2.90603600 | -2.70299800 |
| C  | -1.17466300 | -4.65892500 | -2.28845300 |
| C  | -0.26917500 | -2.95540900 | -4.55580500 |
| C  | -3.88684200 | 0.02418300  | 0.54778900  |
| C  | -3.01488300 | -2.65956900 | -0.05236300 |
| C  | -4.27638100 | -1.06991800 | 1.31286800  |
| C  | -3.83553900 | -2.38480500 | 1.02648400  |
| C  | 0.67454000  | -3.84005600 | 0.51038000  |
| C  | -1.32029200 | 0.44474000  | -3.81192100 |
| C  | -4.37537000 | 1.38985900  | 0.86207600  |
| C  | 3.41601700  | 0.26973600  | -0.82491400 |
| C  | 1.76642600  | -0.32988100 | -3.11210500 |
| C  | 3.49820200  | 0.97862900  | -2.01662400 |
| C  | 2.67661100  | 0.70190300  | -3.13430800 |
| C  | 4.49450000  | 0.42828700  | 0.18731400  |
| C  | -4.87278700 | 2.23538700  | -0.14601800 |
| C  | -5.35992500 | 3.50337200  | 0.16720700  |
| C  | -5.35176000 | 3.95350400  | 1.48932600  |
| C  | -4.38569100 | 1.85023200  | 2.19113300  |
| C  | -4.86472500 | 3.12260700  | 2.50021500  |
| C  | 4.27395900  | 0.34624200  | 1.57101900  |
| C  | 5.32132000  | 0.49876600  | 2.47941800  |
| C  | 6.62049400  | 0.72716200  | 2.02602100  |
| C  | 5.81588100  | 0.64408100  | -0.25353700 |
| C  | 6.86250100  | 0.79545200  | 0.65275500  |
| C  | 0.74136500  | 2.69539500  | 0.50879900  |
| C  | 0.41153400  | 3.44623900  | -0.79133900 |
| C  | 1.09458100  | 4.81994300  | -0.94255100 |
| C  | -0.00363700 | 0.67299800  | 1.93483300  |
| C  | -0.88964900 | -0.43599400 | 2.14344300  |
| C  | -0.63440200 | -1.41319700 | 3.12839700  |
| C  | 0.47658400  | -1.32660700 | 3.96609800  |
| C  | 1.09316100  | 0.76655200  | 2.83250500  |
| C  | 1.29987600  | -0.17963500 | 3.81910300  |
| C  | 0.57592200  | 5.54075400  | -2.19555000 |
| H  | 2.37986400  | -1.68605200 | 1.29450900  |
| H  | -2.52751800 | 1.70423800  | -1.56933200 |
| H  | -0.42856400 | -5.36213200 | -2.67556300 |
| H  | -1.31423900 | -4.88644300 | -1.23173800 |
| H  | -2.11654000 | -4.86949600 | -2.80755800 |

|   |             |             |             |
|---|-------------|-------------|-------------|
| H | 0.43793900  | -3.76964000 | -4.75137000 |
| H | -1.19827100 | -3.19578200 | -5.08515800 |
| H | 0.14454500  | -2.05387100 | -5.00801000 |
| H | -2.75505200 | -3.68321500 | -0.29079500 |
| H | -4.96810000 | -0.91586400 | 2.13490300  |
| H | -4.19053200 | -3.20185800 | 1.64750400  |
| H | 1.23559800  | -0.60537100 | -4.01098000 |
| H | 4.25488800  | 1.74940900  | -2.11340100 |
| H | 2.82073800  | 1.27405200  | -4.04581800 |
| H | -4.91529300 | 1.88267900  | -1.17182700 |
| H | -5.75619800 | 4.13658600  | -0.62083100 |
| H | -5.72836600 | 4.94265400  | 1.73068100  |
| H | -4.00252700 | 1.21292500  | 2.98305100  |
| H | -4.85725300 | 3.46440800  | 3.53072000  |
| H | 3.27267300  | 0.18906400  | 1.94422200  |
| H | 5.12087900  | 0.44103100  | 3.54563800  |
| H | 7.43638000  | 0.84171500  | 2.73291000  |
| H | 6.03104500  | 0.66046700  | -1.31693400 |
| H | 7.87137400  | 0.95400600  | 0.28404300  |
| H | 1.05274300  | -3.79862600 | 1.53425000  |
| H | -0.41300200 | -3.94034700 | 0.56283400  |
| H | 1.06092300  | -4.75187300 | 0.04320000  |
| H | -0.65364300 | 1.30018400  | -3.67229900 |
| H | -0.83338900 | -0.27586000 | -4.46398800 |
| H | -2.20831900 | 0.80715000  | -4.34246400 |
| H | 1.78477100  | 2.36326500  | 0.49076800  |
| H | 0.67418600  | 2.81542900  | -1.65418000 |
| H | -0.67585600 | 3.60120000  | -0.83929200 |
| H | -1.90672300 | -0.39023900 | 1.75614800  |
| H | -1.36080200 | -2.20794000 | 3.26646400  |
| H | 1.75240800  | 1.62463400  | 2.76788600  |
| H | 2.12867300  | -0.04583600 | 4.51036300  |
| H | -1.23565800 | 1.79734700  | 0.62992900  |
| H | 0.65764300  | 3.40431800  | 1.34869000  |
| C | 2.62723000  | 4.72313100  | -0.96911000 |
| H | 1.01452400  | 6.53939300  | -2.28817800 |
| H | 0.83353900  | 4.98276700  | -3.10464100 |
| H | -0.51334900 | 5.65630300  | -2.17118200 |
| H | 0.81015300  | 5.42308600  | -0.06708000 |
| H | 3.07732400  | 5.71564300  | -1.07279200 |
| H | 3.03163600  | 4.27402000  | -0.05664300 |
| H | 2.96389400  | 4.11755300  | -1.81963600 |
| C | 0.79613400  | -2.31729400 | 5.00519700  |
| H | 1.56609900  | -2.00928900 | 5.71092300  |

|   |             |             |            |
|---|-------------|-------------|------------|
| C | 0.25335000  | -3.53334700 | 5.14688800 |
| H | -0.50734200 | -3.92109400 | 4.47475400 |
| H | 0.55945100  | -4.18923800 | 5.95446000 |

# **TS1**

|    |             |             |             |
|----|-------------|-------------|-------------|
| C  | -0.44802600 | 1.56375600  | 0.59197900  |
| C  | 1.27237400  | -2.57515900 | -1.07921300 |
| C  | 1.55178100  | -2.42844000 | 0.32418700  |
| C  | 1.94035000  | -1.45810400 | -1.73369600 |
| C  | 2.25886700  | -1.21103600 | 0.53957900  |
| C  | 2.57825500  | -0.62643300 | -0.73117000 |
| Zr | -0.15351500 | -0.67899700 | -0.28424400 |
| C  | -1.44236800 | -2.27003500 | -1.67034400 |
| C  | -2.28575900 | -2.09803900 | -0.49867400 |
| C  | -1.55134700 | -1.03099900 | -2.41236700 |
| C  | -2.85973100 | -0.76601700 | -0.52229800 |
| C  | -2.32763400 | -0.10665400 | -1.67414800 |
| Si | -0.10333800 | -3.59925800 | -1.90611000 |
| C  | -0.45224600 | -5.23173000 | -1.03124600 |
| C  | 0.20226000  | -4.04400000 | -3.71187600 |
| C  | -3.81126300 | -0.34731500 | 0.46222400  |
| C  | -2.62444700 | -2.97621500 | 0.57070100  |
| C  | -4.12026700 | -1.26144600 | 1.46380800  |
| C  | -3.53263700 | -2.54970300 | 1.52013300  |
| C  | 1.24700300  | -3.41853100 | 1.42345900  |
| C  | -1.11672400 | -0.74076000 | -3.82725300 |
| C  | -4.46436300 | 0.98543500  | 0.41672900  |
| C  | 3.51798400  | 0.39335400  | -1.12592600 |
| C  | 2.20004900  | -1.22556300 | -3.11437100 |
| C  | 3.69124100  | 0.59259900  | -2.48761300 |
| C  | 3.04592700  | -0.20160700 | -3.46910100 |
| C  | 4.40891900  | 1.09722000  | -0.16885800 |
| C  | -5.01169500 | 1.48905700  | -0.77696600 |
| C  | -5.64914700 | 2.72876000  | -0.79866200 |
| C  | -5.74641100 | 3.49029600  | 0.36809100  |
| C  | -4.58122200 | 1.75614700  | 1.58739100  |
| C  | -5.21217800 | 2.99941300  | 1.56110000  |
| C  | 3.94145500  | 1.61632300  | 1.04640700  |
| C  | 4.79729900  | 2.28639000  | 1.91984000  |
| C  | 6.14616800  | 2.44299900  | 1.59809500  |
| C  | 5.77337300  | 1.25541700  | -0.47700100 |
| C  | 6.63060900  | 1.92171900  | 0.39656700  |
| C  | 0.19673400  | 2.90097100  | 0.22356700  |

|   |             |             |             |
|---|-------------|-------------|-------------|
| C | -0.67880800 | 3.74067200  | -0.72056100 |
| C | -0.13256900 | 5.14739100  | -1.03715500 |
| C | -0.11669300 | 0.90103600  | 1.83898900  |
| C | -0.79220300 | -0.32302300 | 2.16729100  |
| C | -0.39883800 | -1.10751700 | 3.27559200  |
| C | 0.66009400  | -0.73079100 | 4.09541200  |
| C | 0.92983400  | 1.29086400  | 2.72288600  |
| C | 1.28073100  | 0.51684700  | 3.80926100  |
| C | -1.17959800 | 5.96381300  | -1.80948400 |
| H | 0.97666700  | 1.30680400  | -2.68521900 |
| H | 0.35092700  | 1.60437200  | -2.41389400 |
| H | 2.62775000  | -0.87836700 | 1.49982300  |
| H | -2.58599900 | 0.88780000  | -2.00999800 |
| H | 0.34287600  | -5.93916300 | -1.29361700 |
| H | -0.49595300 | -5.18554100 | 0.05712800  |
| H | -1.39468000 | -5.65604100 | -1.39500600 |
| H | 1.16389200  | -4.55834700 | -3.81746200 |
| H | -0.57842100 | -4.74612500 | -4.02654700 |
| H | 0.18354400  | -3.20771100 | -4.41160200 |
| H | -2.23899400 | -3.98799500 | 0.59992100  |
| H | -4.86602400 | -0.99365000 | 2.20547700  |
| H | -3.83777900 | -3.22806700 | 2.31126000  |
| H | 1.80814600  | -1.89537700 | -3.86835800 |
| H | 4.38935200  | 1.35527000  | -2.81669500 |
| H | 3.27212000  | -0.02550700 | -4.51642400 |
| H | -4.97318400 | 0.89042700  | -1.68182000 |
| H | -6.08010400 | 3.09519900  | -1.72548200 |
| H | -6.24167100 | 4.45617700  | 0.34905200  |
| H | -4.16220600 | 1.38507100  | 2.51846800  |
| H | -5.28673400 | 3.58396200  | 2.47306200  |
| H | 2.89488000  | 1.51317600  | 1.29529100  |
| H | 4.41043900  | 2.69207600  | 2.85065500  |
| H | 6.81483000  | 2.96155600  | 2.27821900  |
| H | 6.16894000  | 0.82951400  | -1.39378700 |
| H | 7.68102000  | 2.02577100  | 0.14217600  |
| H | 1.59620000  | -3.04161200 | 2.38608600  |
| H | 0.18275500  | -3.64911900 | 1.52318900  |
| H | 1.76621300  | -4.36087500 | 1.21967900  |
| H | -1.34949100 | 0.29465500  | -4.08665600 |
| H | -0.05488000 | -0.89290000 | -4.01173600 |
| H | -1.67416200 | -1.38756900 | -4.51340100 |
| H | 1.19117600  | 2.75348100  | -0.21238700 |
| H | -0.83863300 | 3.20219300  | -1.66671900 |
| H | -1.67177900 | 3.84661200  | -0.26257600 |

|   |             |             |             |
|---|-------------|-------------|-------------|
| H | -1.80120300 | -0.48315400 | 1.79475900  |
| H | -0.98284200 | -1.99155000 | 3.51111800  |
| H | 1.41618100  | 2.24759200  | 2.57284500  |
| H | 2.05868500  | 0.87291400  | 4.48039700  |
| H | -1.52903500 | 1.57775800  | 0.42757500  |
| H | 0.35570300  | 3.49533300  | 1.13609700  |
| C | 1.19671400  | 5.10868700  | -1.80702900 |
| H | -0.82453900 | 6.98146500  | -2.00052600 |
| H | -1.39768800 | 5.50290000  | -2.78094300 |
| H | -2.12151900 | 6.03614500  | -1.25512700 |
| H | 0.04679900  | 5.65468300  | -0.07700000 |
| H | 1.55125600  | 6.12237100  | -2.01967000 |
| H | 1.98782300  | 4.59761400  | -1.24917900 |
| H | 1.07554300  | 4.59421600  | -2.76860400 |
| C | 1.12290000  | -1.51775000 | 5.24855700  |
| H | 1.81101300  | -0.99706600 | 5.91279200  |
| C | 0.79878900  | -2.78528700 | 5.53609100  |
| H | 1.19550300  | -3.27539100 | 6.41841900  |
| H | 0.13339900  | -3.37854600 | 4.91471300  |

# IM1

|    |             |             |             |
|----|-------------|-------------|-------------|
| C  | -0.39850100 | 1.67025400  | 0.62054900  |
| C  | 1.09484500  | -2.67606400 | -1.03837400 |
| C  | 1.36508000  | -2.51520400 | 0.36676600  |
| C  | 1.83277100  | -1.61914700 | -1.70869400 |
| C  | 2.17460200  | -1.35853600 | 0.55813200  |
| C  | 2.53244000  | -0.81857800 | -0.71580500 |
| Zr | -0.15807600 | -0.61629000 | -0.37882300 |
| C  | -1.58972300 | -2.21184000 | -1.63192500 |
| C  | -2.39961600 | -1.97164800 | -0.44652600 |
| C  | -1.65504000 | -0.99079100 | -2.40325300 |
| C  | -2.92323900 | -0.62111200 | -0.50051000 |
| C  | -2.38246700 | -0.01539000 | -1.67273100 |
| Si | -0.34042300 | -3.62827700 | -1.84637100 |
| C  | -0.78582300 | -5.22294800 | -0.94619700 |
| C  | -0.05979300 | -4.12891800 | -3.64228600 |
| C  | -3.84854200 | -0.13919900 | 0.48178800  |
| C  | -2.78240700 | -2.81758700 | 0.63569100  |
| C  | -4.19410800 | -1.01824400 | 1.49834600  |
| C  | -3.66595000 | -2.33425500 | 1.57669400  |
| C  | 1.00871000  | -3.47058500 | 1.48041300  |
| C  | -1.23981600 | -0.75113500 | -3.83361700 |
| C  | -4.43919700 | 1.22269500  | 0.41320500  |

|   |             |             |             |
|---|-------------|-------------|-------------|
| C | 3.50734000  | 0.16337700  | -1.13228600 |
| C | 2.07198600  | -1.38866700 | -3.09804900 |
| C | 3.64102300  | 0.37090500  | -2.49638700 |
| C | 2.94009400  | -0.39130900 | -3.46711300 |
| C | 4.45755100  | 0.82174900  | -0.19945000 |
| C | -4.98147600 | 1.72387100  | -0.78368600 |
| C | -5.56287000 | 2.99054100  | -0.82546800 |
| C | -5.60956900 | 3.78166400  | 0.32452600  |
| C | -4.50327500 | 2.02491700  | 1.56647400  |
| C | -5.08006700 | 3.29395200  | 1.52081200  |
| C | 4.07189800  | 1.29622400  | 1.06305700  |
| C | 4.98718000  | 1.92350600  | 1.90780000  |
| C | 6.31565000  | 2.08177200  | 1.51161900  |
| C | 5.80470300  | 0.97735700  | -0.57955500 |
| C | 6.72044100  | 1.60194100  | 0.26437500  |
| C | 0.28557300  | 3.00463300  | 0.33656000  |
| C | -0.29442900 | 3.75680400  | -0.87180300 |
| C | 0.25244400  | 5.18607500  | -1.06522900 |
| C | -0.07373200 | 0.93906500  | 1.82459800  |
| C | -0.80013800 | -0.25193800 | 2.14708500  |
| C | -0.44531400 | -1.04753300 | 3.25868300  |
| C | 0.62734300  | -0.71641800 | 4.07923800  |
| C | 1.00258000  | 1.27954600  | 2.69745400  |
| C | 1.31748800  | 0.49339900  | 3.78341700  |
| C | -0.53386900 | 5.91217500  | -2.16659400 |
| H | 0.48998200  | 0.63849300  | -1.93646500 |
| H | 0.32415500  | 1.15039400  | -1.36713100 |
| H | 2.55403200  | -1.03437300 | 1.51652300  |
| H | -2.60051500 | 0.98190400  | -2.02971100 |
| H | -0.04282900 | -5.98351100 | -1.21275100 |
| H | -0.80908600 | -5.16235700 | 0.14182500  |
| H | -1.75962700 | -5.58757800 | -1.29139900 |
| H | 0.87728200  | -4.68905500 | -3.73534400 |
| H | -0.87161500 | -4.80322000 | -3.93840400 |
| H | -0.04219000 | -3.31238500 | -4.36490200 |
| H | -2.44254400 | -3.84459700 | 0.68376900  |
| H | -4.92404700 | -0.70409000 | 2.23780200  |
| H | -4.00172500 | -2.98302900 | 2.38012200  |
| H | 1.63439300  | -2.03752800 | -3.84515100 |
| H | 4.35352400  | 1.11249700  | -2.84195500 |
| H | 3.14256300  | -0.21193100 | -4.51863000 |
| H | -4.98429400 | 1.10351600  | -1.67468400 |
| H | -5.99093400 | 3.35483700  | -1.75455500 |
| H | -6.06185300 | 4.76799900  | 0.29006200  |

|   |             |             |             |
|---|-------------|-------------|-------------|
| H | -4.08766600 | 1.65565200  | 2.49985100  |
| H | -5.11566300 | 3.90110200  | 2.42034000  |
| H | 3.04402700  | 1.19077900  | 1.37989200  |
| H | 4.66188000  | 2.29239700  | 2.87664000  |
| H | 7.02998000  | 2.56665200  | 2.16975300  |
| H | 6.14312700  | 0.57929100  | -1.53082900 |
| H | 7.75508500  | 1.70369300  | -0.04877900 |
| H | 1.37674900  | -3.09761500 | 2.43742500  |
| H | -0.06559700 | -3.64265900 | 1.58252800  |
| H | 1.48089500  | -4.44089500 | 1.29426000  |
| H | -1.28235000 | 0.31620000  | -4.06870400 |
| H | -0.23895900 | -1.10360700 | -4.07318300 |
| H | -1.94215400 | -1.26173400 | -4.50237300 |
| H | 1.36637000  | 2.86735900  | 0.21286800  |
| H | -0.11470300 | 3.19107200  | -1.79914100 |
| H | -1.38531300 | 3.81266400  | -0.75490700 |
| H | -1.80190300 | -0.38305800 | 1.75268500  |
| H | -1.06864700 | -1.90405500 | 3.49354400  |
| H | 1.53629800  | 2.20930700  | 2.53923800  |
| H | 2.11468100  | 0.81019700  | 4.45165100  |
| H | -1.47301900 | 1.70502500  | 0.42713600  |
| H | 0.16526900  | 3.65147000  | 1.22023700  |
| C | 1.75768100  | 5.20513700  | -1.37220300 |
| H | -0.18947000 | 6.94465600  | -2.28195400 |
| H | -0.40636200 | 5.41251500  | -3.13504400 |
| H | -1.60576500 | 5.94023400  | -1.94289500 |
| H | 0.09071000  | 5.72997900  | -0.12252900 |
| H | 2.11269600  | 6.23131400  | -1.51030300 |
| H | 2.35443900  | 4.76009100  | -0.56975200 |
| H | 1.97401800  | 4.65575800  | -2.29747900 |
| C | 1.04689400  | -1.51247300 | 5.24251400  |
| H | 1.79212100  | -1.03607500 | 5.87774300  |
| C | 0.62187000  | -2.73886100 | 5.57400800  |
| H | 0.99847500  | -3.23739800 | 6.46042400  |
| H | -0.11029300 | -3.28788100 | 4.98840300  |

## TS2

|    |             |             |             |
|----|-------------|-------------|-------------|
| C  | -0.40167500 | 1.74463700  | 0.54979800  |
| C  | 1.10132800  | -2.75822100 | -0.92601600 |
| C  | 1.35844000  | -2.52433900 | 0.47247600  |
| C  | 1.86105000  | -1.74788600 | -1.64539500 |
| C  | 2.16816300  | -1.35977900 | 0.60876400  |
| C  | 2.54821800  | -0.89722800 | -0.69131400 |
| Zr | -0.14011500 | -0.67490600 | -0.36733600 |



|    |             |             |             |
|----|-------------|-------------|-------------|
| C  | -1.57204900 | -2.29800900 | -1.56292200 |
| C  | -2.39537600 | -1.99992900 | -0.39829900 |
| C  | -1.62094900 | -1.11190400 | -2.39071300 |
| C  | -2.90548100 | -0.64956900 | -0.51761400 |
| C  | -2.34802600 | -0.10274500 | -1.71211500 |
| Si | -0.33461700 | -3.73474900 | -1.70263800 |
| C  | -0.79988300 | -5.28379000 | -0.73537700 |
| C  | -0.05059200 | -4.31234800 | -3.47446800 |
| C  | -3.84052200 | -0.11828100 | 0.43019000  |
| C  | -2.79977500 | -2.79523300 | 0.71313500  |
| C  | -4.20886900 | -0.95030300 | 1.47777600  |
| C  | -3.69294900 | -2.26572600 | 1.61990100  |
| C  | 0.98900200  | -3.41688700 | 1.63283500  |
| C  | -1.17071900 | -0.93243800 | -3.81794600 |
| C  | -4.41499300 | 1.24596000  | 0.29714100  |
| C  | 3.53113600  | 0.05569700  | -1.14707500 |
| C  | 2.12585000  | -1.60477900 | -3.03913800 |
| C  | 3.70417000  | 0.17004900  | -2.51762100 |
| C  | 3.01774600  | -0.64577100 | -3.45218600 |
| C  | 4.44695000  | 0.78433100  | -0.23303900 |
| C  | -4.93234900 | 1.70559600  | -0.92721200 |
| C  | -5.49827500 | 2.97600800  | -1.02828000 |
| C  | -5.55416000 | 3.81267500  | 0.08859100  |
| C  | -4.48818200 | 2.09440100  | 1.41653700  |
| C  | -5.04964300 | 3.36685700  | 1.31171800  |
| C  | 4.00259900  | 1.37676600  | 0.95784700  |
| C  | 4.88004900  | 2.07496400  | 1.78687600  |
| C  | 6.22862400  | 2.18701900  | 1.44590600  |
| C  | 5.81184400  | 0.89663400  | -0.55834100 |
| C  | 6.69067800  | 1.59105800  | 0.27072300  |
| C  | 0.25738200  | 3.10219800  | 0.29114000  |
| C  | -0.27431800 | 3.81234600  | -0.96351600 |
| C  | 0.27050700  | 5.24037900  | -1.17134200 |
| C  | -0.08205000 | 1.03074800  | 1.78988200  |
| C  | -0.82805100 | -0.12940100 | 2.15355700  |
| C  | -0.50565900 | -0.87724400 | 3.30234600  |
| C  | 0.55819100  | -0.51927800 | 4.12813900  |
| C  | 0.97670000  | 1.40341800  | 2.66066200  |
| C  | 1.26781500  | 0.66241000  | 3.78885800  |
| C  | -0.47607400 | 5.93120300  | -2.32193600 |
| H  | 0.39279700  | 0.69969400  | -1.61211300 |
| H  | 0.15132300  | 1.19467200  | -0.86300500 |
| H  | 2.54450500  | -0.98644800 | 1.55092300  |
| H  | -2.54799200 | 0.88094100  | -2.11452100 |

|   |             |             |             |
|---|-------------|-------------|-------------|
| H | -0.05832100 | -6.05925000 | -0.95985200 |
| H | -0.83373800 | -5.17452700 | 0.34888500  |
| H | -1.77217500 | -5.65895100 | -1.07353300 |
| H | 0.88387400  | -4.88005100 | -3.54405700 |
| H | -0.86556600 | -4.99393700 | -3.74426500 |
| H | -0.02903300 | -3.52409900 | -4.22786200 |
| H | -2.46761800 | -3.82138500 | 0.80933700  |
| H | -4.94673200 | -0.59910500 | 2.19237100  |
| H | -4.04605900 | -2.87739200 | 2.44474500  |
| H | 1.69199000  | -2.29162100 | -3.75385200 |
| H | 4.43126900  | 0.88350600  | -2.89154200 |
| H | 3.24425600  | -0.53639000 | -4.50837300 |
| H | -4.92825900 | 1.05058700  | -1.79296500 |
| H | -5.90719700 | 3.30787200  | -1.97790700 |
| H | -5.99448300 | 4.80171300  | 0.00780000  |
| H | -4.09333600 | 1.75742100  | 2.37096700  |
| H | -5.09321000 | 4.00922500  | 2.18611800  |
| H | 2.95776500  | 1.30479300  | 1.22635900  |
| H | 4.51080100  | 2.53595000  | 2.69900600  |
| H | 6.91402400  | 2.72726700  | 2.09156300  |
| H | 6.19066600  | 0.41336600  | -1.45342800 |
| H | 7.74067100  | 1.65839400  | 0.00255500  |
| H | 1.31983600  | -2.97731400 | 2.57536300  |
| H | -0.08329900 | -3.61066800 | 1.71370500  |
| H | 1.48917700  | -4.38505500 | 1.52248200  |
| H | -1.22018200 | 0.12272200  | -4.09987500 |
| H | -0.15664000 | -1.27615100 | -4.00949900 |
| H | -1.84477300 | -1.48524500 | -4.48237000 |
| H | 1.34575800  | 2.98975400  | 0.22556300  |
| H | -0.04377800 | 3.21707300  | -1.86009800 |
| H | -1.36986700 | 3.86088300  | -0.89812300 |
| H | -1.80572600 | -0.29391600 | 1.71326000  |
| H | -1.14037100 | -1.71857600 | 3.55974300  |
| H | 1.52861300  | 2.31561400  | 2.46848400  |
| H | 2.06207000  | 0.99884400  | 4.45060200  |
| H | -1.47832500 | 1.77904000  | 0.36651700  |
| H | 0.06758800  | 3.74672200  | 1.16273600  |
| C | 1.78660300  | 5.26231200  | -1.41991600 |
| H | -0.13114500 | 6.96157200  | -2.45314200 |
| H | -0.30973700 | 5.40462700  | -3.26985800 |
| H | -1.55580500 | 5.96047700  | -2.14005600 |
| H | 0.06787200  | 5.80747000  | -0.25030300 |
| H | 2.13993000  | 6.28741200  | -1.56963500 |
| H | 2.35559900  | 4.84200600  | -0.58448500 |

|   |             |             |             |
|---|-------------|-------------|-------------|
| H | 2.04219500  | 4.69138000  | -2.32159000 |
| C | 0.94774900  | -1.26813000 | 5.33301500  |
| H | 1.69870100  | -0.77977800 | 5.95199200  |
| C | 0.48810900  | -2.46575100 | 5.71787400  |
| H | -0.25283400 | -3.02341600 | 5.15187700  |
| H | 0.84447500  | -2.93117800 | 6.63028300  |

## IM2

|    |             |             |             |
|----|-------------|-------------|-------------|
| C  | 2.43117800  | 2.23349200  | -0.15361500 |
| C  | -1.66868000 | -2.92996600 | -0.24906400 |
| C  | -1.26825900 | -2.65521600 | 1.10834200  |
| C  | -0.43589500 | -2.97307400 | -1.02435900 |
| C  | 0.13457100  | -2.43152200 | 1.14675000  |
| C  | 0.68627800  | -2.68817900 | -0.15393300 |
| Zr | -0.96942300 | -0.57381800 | -0.26105500 |
| C  | -3.20921000 | -0.83866500 | -1.25848300 |
| C  | -3.44812100 | 0.15939100  | -0.22579900 |
| C  | -2.45245300 | -0.15830900 | -2.28925900 |
| C  | -2.80772900 | 1.40006200  | -0.61281000 |
| C  | -2.14568200 | 1.15193300  | -1.85674200 |
| Si | -3.39701400 | -2.71623100 | -1.01489300 |
| C  | -4.80320500 | -3.22940300 | 0.13155100  |
| C  | -3.68854700 | -3.66182100 | -2.61880900 |
| C  | -2.97772100 | 2.59891200  | 0.16025100  |
| C  | -4.22108900 | 0.12549200  | 0.97149300  |
| C  | -3.75480300 | 2.50123000  | 1.30487300  |
| C  | -4.36470000 | 1.28352800  | 1.70596100  |
| C  | -2.12910400 | -2.66211400 | 2.34675200  |
| C  | -2.10320700 | -0.63792000 | -3.67360500 |
| C  | -2.39221000 | 3.89982900  | -0.25439400 |
| C  | 2.03403800  | -2.84234000 | -0.62695600 |
| C  | -0.19978400 | -3.31913300 | -2.38225900 |
| C  | 2.19240600  | -3.17326900 | -1.96670100 |
| C  | 1.09938800  | -3.39975700 | -2.83312100 |
| C  | 3.21736600  | -2.80486700 | 0.26828300  |
| C  | -2.49632000 | 4.36136500  | -1.57927200 |
| C  | -1.97437800 | 5.60195600  | -1.94351300 |
| C  | -1.33476500 | 6.40299400  | -0.99514100 |
| C  | -1.75570000 | 4.72242400  | 0.69276300  |
| C  | -1.22939800 | 5.96015800  | 0.32486000  |
| C  | 3.36595900  | -1.84102600 | 1.27742200  |
| C  | 4.49375000  | -1.83019500 | 2.09832900  |
| C  | 5.49483700  | -2.78850700 | 1.93327300  |
| C  | 4.23239000  | -3.76817600 | 0.11708000  |

|   |             |             |             |
|---|-------------|-------------|-------------|
| C | 5.35776800  | -3.75870300 | 0.93863600  |
| C | 3.96067600  | 2.15153500  | -0.07847800 |
| C | 4.62923500  | 2.68510100  | -1.35340800 |
| C | 6.17078200  | 2.70673700  | -1.31902200 |
| C | 1.66580500  | 1.68185700  | 1.03319500  |
| C | 0.25702100  | 1.58973400  | 0.97667100  |
| C | -0.50335100 | 1.11281000  | 2.05683700  |
| C | 0.12413900  | 0.72317400  | 3.26453300  |
| C | 2.27177700  | 1.30422000  | 2.23634400  |
| C | 1.52151300  | 0.83422100  | 3.31720200  |
| C | 6.72119000  | 3.43732700  | -2.55287800 |
| H | 0.29918800  | -0.23555200 | -1.51857100 |
| H | 2.08492700  | 1.70913200  | -1.05398700 |
| H | 0.70077000  | -2.24530400 | 2.04932600  |
| H | -1.58781600 | 1.87184900  | -2.43887000 |
| H | -4.87958900 | -4.32265000 | 0.10710300  |
| H | -4.69723000 | -2.93749000 | 1.17661200  |
| H | -5.75283000 | -2.83049900 | -0.24217400 |
| H | -3.47154600 | -4.72602100 | -2.47454400 |
| H | -4.75148400 | -3.57846900 | -2.87320300 |
| H | -3.12330200 | -3.31194800 | -3.48319300 |
| H | -4.75499800 | -0.77145100 | 1.25893400  |
| H | -3.94449700 | 3.39721100  | 1.88751600  |
| H | -4.99738800 | 1.28253500  | 2.58860400  |
| H | -1.02049700 | -3.59355600 | -3.03206000 |
| H | 3.19746100  | -3.28702600 | -2.35948300 |
| H | 1.29594100  | -3.68439900 | -3.86222700 |
| H | -3.02520700 | 3.76644100  | -2.31714800 |
| H | -2.07877600 | 5.94859700  | -2.96722400 |
| H | -0.92837700 | 7.36815500  | -1.28126000 |
| H | -1.66382600 | 4.38255200  | 1.72032200  |
| H | -0.73815700 | 6.57872000  | 1.06995900  |
| H | 2.61042800  | -1.07624800 | 1.40154100  |
| H | 4.59273000  | -1.06998900 | 2.86824700  |
| H | 6.37022800  | -2.78277800 | 2.57533100  |
| H | 4.12432900  | -4.54708300 | -0.63128800 |
| H | 6.12391100  | -4.51690100 | 0.80800500  |
| H | -1.55564100 | -2.33366700 | 3.21561500  |
| H | -3.00702000 | -2.01709800 | 2.27161300  |
| H | -2.48570300 | -3.67945700 | 2.54167000  |
| H | -1.38192300 | 0.03943500  | -4.13690700 |
| H | -1.67582500 | -1.63843500 | -3.69910300 |
| H | -3.00750700 | -0.64466900 | -4.29332700 |
| H | 4.25801700  | 1.11032600  | 0.09433800  |

|   |             |             |             |
|---|-------------|-------------|-------------|
| H | 4.29921300  | 2.08566600  | -2.21494200 |
| H | 4.26870700  | 3.70670700  | -1.53751400 |
| H | -0.24719300 | 2.03158800  | 0.11771400  |
| H | -1.58927200 | 1.16975600  | 2.01242800  |
| H | 3.34801200  | 1.38216100  | 2.34238300  |
| H | 2.03452100  | 0.56455700  | 4.23663400  |
| H | 2.13073000  | 3.28258500  | -0.29072500 |
| H | 4.32287300  | 2.73119300  | 0.78154900  |
| C | 6.77724000  | 1.29907800  | -1.21019200 |
| H | 7.81381000  | 3.49758400  | -2.52185400 |
| H | 6.44514700  | 2.91188400  | -3.47522900 |
| H | 6.33158900  | 4.45876700  | -2.62186400 |
| H | 6.47432500  | 3.27729500  | -0.42799900 |
| H | 7.87086600  | 1.34779000  | -1.19680500 |
| H | 6.46226200  | 0.77663200  | -0.30133300 |
| H | 6.48484500  | 0.68197900  | -2.06899000 |
| C | -0.60135500 | 0.28521900  | 4.46665100  |
| H | 0.03700500  | -0.07144700 | 5.27339100  |
| C | -1.92469900 | 0.31969700  | 4.67192800  |
| H | -2.62811900 | 0.68674600  | 3.93058300  |
| H | -2.34664700 | -0.01364100 | 5.61412000  |

#### DVB-PP<sub>1</sub>

|   |             |             |             |
|---|-------------|-------------|-------------|
| C | 0.67016600  | -1.05176400 | -0.00549600 |
| C | 1.78293900  | -0.00460400 | -0.12699800 |
| C | 3.18169000  | -0.63105000 | -0.04922600 |
| C | 4.35311600  | 0.34814800  | -0.26164600 |
| C | -0.75869800 | -0.53697500 | -0.02330000 |
| C | -1.81174300 | -1.43144700 | 0.23916800  |
| C | -3.13716300 | -1.02149400 | 0.22468600  |
| C | -3.47822300 | 0.31603500  | -0.05367200 |
| C | -1.09528400 | 0.79154500  | -0.29903400 |
| C | -2.42751900 | 1.20716000  | -0.31323000 |
| C | 5.68205000  | -0.41584000 | -0.35456000 |
| H | 1.66114700  | 0.74512600  | 0.66411700  |
| H | 3.30527800  | -1.12774700 | 0.92477000  |
| H | 3.25215800  | -1.42667200 | -0.80421600 |
| H | -1.57960500 | -2.47113300 | 0.45983500  |
| H | -3.91761600 | -1.74664900 | 0.43435100  |
| H | -0.31748000 | 1.51913900  | -0.50535200 |
| H | -2.65779600 | 2.24752600  | -0.53013600 |
| H | 0.78611000  | -1.78687000 | -0.81562500 |
| H | 1.68424000  | 0.53174900  | -1.08052800 |

|   |             |             |             |
|---|-------------|-------------|-------------|
| C | 4.42714100  | 1.42447000  | 0.83212400  |
| H | 6.51946100  | 0.26437300  | -0.54354100 |
| H | 5.89338000  | -0.94892400 | 0.58056700  |
| H | 5.66274500  | -1.15632400 | -1.16157100 |
| H | 4.19047100  | 0.85611500  | -1.22453700 |
| H | 5.27400600  | 2.09770800  | 0.66116600  |
| H | 3.52237800  | 2.03844200  | 0.87122600  |
| H | 4.56271400  | 0.96663800  | 1.81993300  |
| C | -4.86339100 | 0.80993500  | -0.08177900 |
| H | -4.95805000 | 1.87145200  | -0.30962300 |
| C | -5.98542400 | 0.11308100  | 0.13639700  |
| H | -5.98430900 | -0.94757700 | 0.36938700  |
| H | -6.95720700 | 0.59284000  | 0.08735600  |
| H | 0.82003400  | -1.62241300 | 0.92181600  |

# **[Zr]-H**

|    |             |             |             |
|----|-------------|-------------|-------------|
| C  | -1.42237500 | -2.23674200 | -0.47980900 |
| C  | -1.53645100 | -1.49432700 | -1.72213200 |
| C  | -2.15613100 | -1.44908200 | 0.50727400  |
| C  | -2.17065600 | -0.25609200 | -1.48025200 |
| C  | -2.56626100 | -0.19541500 | -0.10293200 |
| Zr | -0.06287000 | -0.26734200 | -0.03848700 |
| C  | 1.24523900  | -2.25079400 | 0.42731500  |
| C  | 2.04452000  | -1.49209400 | -0.53841100 |
| C  | 1.33000000  | -1.50507300 | 1.66596100  |
| C  | 2.51369800  | -0.27346000 | 0.08903200  |
| C  | 2.00480600  | -0.28106500 | 1.43631000  |
| Si | -0.09223200 | -3.54238700 | -0.03392100 |
| C  | 0.37416900  | -4.66801100 | -1.46775200 |
| C  | -0.56833900 | -4.68189500 | 1.38684100  |
| C  | 3.32702000  | 0.66724400  | -0.61627600 |
| C  | 2.36811400  | -1.72600200 | -1.90069300 |
| C  | 3.63855200  | 0.35986600  | -1.93655800 |
| C  | 3.16633600  | -0.81040800 | -2.56576300 |
| C  | -1.09912500 | -1.92035100 | -3.09818500 |
| C  | 0.86519000  | -1.91989500 | 3.03934700  |
| C  | 3.83046800  | 1.90581400  | 0.02578800  |
| C  | -3.21700400 | 0.83054200  | 0.66550000  |
| C  | -2.48163800 | -1.69034300 | 1.87250900  |
| C  | -3.47304800 | 0.53898200  | 2.00091900  |
| C  | -3.13518200 | -0.70770200 | 2.58728700  |
| C  | -3.64997800 | 2.11571200  | 0.06133600  |
| C  | 4.45072600  | 1.87648600  | 1.28760900  |

|   |             |             |             |
|---|-------------|-------------|-------------|
| C | 4.93877100  | 3.04819700  | 1.86492900  |
| C | 4.80933900  | 4.26773700  | 1.19668900  |
| C | 3.71713600  | 3.13760800  | -0.64229700 |
| C | 4.19868400  | 4.30877400  | -0.05846100 |
| C | -2.79975900 | 2.86537300  | -0.77158000 |
| C | -3.21872000 | 4.08257100  | -1.30704100 |
| C | -4.49759800 | 4.56869600  | -1.02787700 |
| C | -4.93316700 | 2.61926800  | 0.33645100  |
| C | -5.35286000 | 3.83300800  | -0.20569600 |
| H | -2.37304500 | 0.49164500  | -2.23341600 |
| H | 2.22156300  | 0.45812800  | 2.19710300  |
| H | -0.43238600 | -5.39541100 | -1.61461600 |
| H | 0.54507100  | -4.17656800 | -2.42583000 |
| H | 1.27776000  | -5.23159700 | -1.20974500 |
| H | -1.47090700 | -5.24177600 | 1.11722600  |
| H | 0.23637900  | -5.41203500 | 1.53031600  |
| H | -0.74415500 | -4.20193000 | 2.34992800  |
| H | 2.06758300  | -2.64371200 | -2.39066800 |
| H | 4.28388600  | 1.03266400  | -2.49206300 |
| H | 3.45859100  | -1.00741500 | -3.59261900 |
| H | -2.26860000 | -2.65018700 | 2.32622100  |
| H | -3.96532000 | 1.28800700  | 2.61308900  |
| H | -3.40834200 | -0.88857300 | 3.62225300  |
| H | 4.58968000  | 0.92815000  | 1.79848300  |
| H | 5.43095600  | 3.00682900  | 2.83191900  |
| H | 5.18812200  | 5.17922500  | 1.64861100  |
| H | 3.23552300  | 3.17516300  | -1.61522900 |
| H | 4.09722300  | 5.25326300  | -0.58430700 |
| H | -1.79454500 | 2.51232600  | -0.99075700 |
| H | -2.54453800 | 4.65294100  | -1.93882200 |
| H | -4.82485500 | 5.51411300  | -1.44905300 |
| H | -5.61267600 | 2.04305200  | 0.95720700  |
| H | -6.35128400 | 4.20065100  | 0.00995100  |
| H | -1.30651300 | -1.12844600 | -3.82124000 |
| H | -0.03517100 | -2.15115500 | -3.16060200 |
| H | -1.65298800 | -2.81451800 | -3.40292300 |
| H | 1.02537600  | -1.11062400 | 3.75652600  |
| H | -0.18669400 | -2.20112400 | 3.08421800  |
| H | 1.45126600  | -2.78202800 | 3.37533300  |
| H | 0.40220000  | 0.78527700  | -1.45841000 |

**[Zr]-BVPE-PP<sub>1</sub>**

|   |            |             |             |
|---|------------|-------------|-------------|
| C | 1.57389800 | -0.10673800 | -1.61620600 |
|---|------------|-------------|-------------|

|    |             |             |             |
|----|-------------|-------------|-------------|
| C  | 1.12716700  | 0.96387600  | 2.82994400  |
| C  | -0.21700300 | 1.04771200  | 2.31936500  |
| C  | 1.92526900  | 1.83729900  | 1.97280000  |
| C  | -0.23732000 | 1.88228400  | 1.17460900  |
| C  | 1.06010800  | 2.46176000  | 0.98782700  |
| Zr | 1.23157300  | -0.28778300 | 0.72956000  |
| C  | 2.31720800  | -1.55122100 | 2.57941400  |
| C  | 1.42227000  | -2.49480600 | 1.92860500  |
| C  | 3.42367200  | -1.37585000 | 1.66450000  |
| C  | 1.97820300  | -2.85485600 | 0.63552000  |
| C  | 3.17214700  | -2.08788700 | 0.47024400  |
| Si | 1.85051900  | -0.35868500 | 3.98754300  |
| C  | 0.60133900  | -1.07005400 | 5.20802000  |
| C  | 3.27798800  | 0.23368000  | 5.06785700  |
| C  | 1.36003800  | -3.84860300 | -0.19337400 |
| C  | 0.17173600  | -3.06000800 | 2.31435700  |
| C  | 0.16352800  | -4.39100900 | 0.26204800  |
| C  | -0.42692800 | -3.99160200 | 1.48569000  |
| C  | -1.46651000 | 0.41084600  | 2.87967100  |
| C  | 4.75898500  | -0.72464700 | 1.92217600  |
| C  | 1.96605100  | -4.29510000 | -1.47256700 |
| C  | 1.53072400  | 3.57723900  | 0.20720300  |
| C  | 3.30016500  | 2.20432800  | 2.02313300  |
| C  | 2.88758600  | 3.86217800  | 0.29177200  |
| C  | 3.76363600  | 3.17419600  | 1.16335000  |
| C  | 0.63394200  | 4.52199000  | -0.51141200 |
| C  | 3.33301900  | -4.61555500 | -1.55811900 |
| C  | 3.88325000  | -5.06596900 | -2.75717000 |
| C  | 3.08207000  | -5.19708100 | -3.89363800 |
| C  | 1.16807200  | -4.44393500 | -2.62108600 |
| C  | 1.72286200  | -4.88603100 | -3.82144900 |
| C  | -0.50933000 | 4.11757500  | -1.21836800 |
| C  | -1.32039800 | 5.04557100  | -1.87137400 |
| C  | -1.01466000 | 6.40566100  | -1.82511000 |
| C  | 0.91927400  | 5.90153500  | -0.46242300 |
| C  | 0.10911800  | 6.82899400  | -1.11308000 |
| C  | 2.33316700  | 0.91757700  | -2.45050900 |
| C  | 3.85841000  | 0.79032600  | -2.30923600 |
| C  | 4.67878200  | 1.58298400  | -3.34645100 |
| C  | 0.11325300  | -0.13021900 | -1.64405700 |
| C  | -0.58530500 | -1.09880300 | -0.85690700 |
| C  | -1.99320700 | -1.04725300 | -0.69217700 |
| C  | -2.75791000 | -0.07497700 | -1.31896100 |
| C  | -0.69343500 | 0.84969800  | -2.28386400 |



|   |             |             |             |
|---|-------------|-------------|-------------|
| C | -2.06847500 | 0.84923900  | -2.14575700 |
| C | 6.17368200  | 1.26050100  | -3.20598700 |
| H | -1.13414000 | 2.12874900  | 0.62486400  |
| H | 3.84987100  | -2.14253400 | -0.36980500 |
| H | 0.39443700  | -0.31731100 | 5.97716100  |
| H | -0.35758500 | -1.37854800 | 4.79212000  |
| H | 1.04422600  | -1.93550500 | 5.71379700  |
| H | 2.86381500  | 0.86545100  | 5.86198200  |
| H | 3.74994300  | -0.62938300 | 5.55106100  |
| H | 4.06208500  | 0.81032000  | 4.57710500  |
| H | -0.26570000 | -2.83041100 | 3.27790600  |
| H | -0.31514200 | -5.17072800 | -0.32179000 |
| H | -1.35263600 | -4.46541800 | 1.79838700  |
| H | 3.96023900  | 1.77667700  | 2.76288400  |
| H | 3.28842000  | 4.67471000  | -0.30406100 |
| H | 4.80779400  | 3.47007200  | 1.19833100  |
| H | 3.95751100  | -4.54992000 | -0.67259100 |
| H | 4.93679000  | -5.32507600 | -2.80110000 |
| H | 3.51304200  | -5.54502400 | -4.82730700 |
| H | 0.11125500  | -4.19681500 | -2.57547500 |
| H | 1.09312300  | -4.98680900 | -4.70016200 |
| H | -0.75458200 | 3.06771200  | -1.28415900 |
| H | -2.19359000 | 4.70379100  | -2.42006900 |
| H | -1.64841700 | 7.12833500  | -2.32967000 |
| H | 1.76517900  | 6.25427900  | 0.11847200  |
| H | 0.34985400  | 7.88601100  | -1.05218000 |
| H | -2.32605800 | 0.65298500  | 2.25062000  |
| H | -1.40973600 | -0.67858000 | 2.95465400  |
| H | -1.66484200 | 0.79526500  | 3.88556300  |
| H | 5.03843400  | -0.01841600 | 1.13585000  |
| H | 4.80189000  | -0.21593300 | 2.88210700  |
| H | 5.52360000  | -1.50962100 | 1.94148600  |
| H | 2.02076500  | 1.93367100  | -2.18706200 |
| H | 4.15918800  | 1.10256400  | -1.29800300 |
| H | 4.13119100  | -0.27079700 | -2.40026300 |
| H | -0.10663100 | -2.05061300 | -0.62733700 |
| H | -2.46782800 | -1.82641800 | -0.10507600 |
| H | -0.22108200 | 1.57726600  | -2.93411200 |
| H | -2.65062500 | 1.58610600  | -2.69539000 |
| H | 1.98640000  | -1.11099700 | -1.75296300 |
| H | 2.07285300  | 0.78114200  | -3.51286800 |
| C | 4.44180100  | 3.09817600  | -3.26106400 |
| H | 6.76382900  | 1.77803200  | -3.96890000 |
| H | 6.55346000  | 1.57621300  | -2.22601600 |

|   |              |             |             |
|---|--------------|-------------|-------------|
| H | 6.36447900   | 0.18652700  | -3.30855500 |
| H | 4.35566700   | 1.24724800  | -4.34347900 |
| H | 5.03534300   | 3.62732000  | -4.01351300 |
| H | 3.39300500   | 3.36501100  | -3.42463200 |
| H | 4.73720100   | 3.48334700  | -2.27716400 |
| C | -4.26737200  | 0.02125000  | -1.20991800 |
| H | -4.52921400  | 1.00463700  | -0.79562300 |
| C | -4.96739000  | -1.06801100 | -0.37654700 |
| H | -4.56538300  | -1.06197100 | 0.64488900  |
| H | -4.69169900  | 0.01730700  | -2.22255700 |
| H | -4.73984500  | -2.05341900 | -0.80145300 |
| C | -6.46743900  | -0.86911700 | -0.32994700 |
| C | -7.05702600  | -0.05716500 | 0.65078600  |
| C | -7.30400100  | -1.45860200 | -1.28425500 |
| C | -8.42961700  | 0.16279800  | 0.67577500  |
| H | -6.43105200  | 0.40332800  | 1.41249400  |
| C | -8.67989700  | -1.23994500 | -1.26105300 |
| H | -6.87739500  | -2.10113100 | -2.05127200 |
| C | -9.27456100  | -0.42245600 | -0.28522800 |
| H | -8.85027400  | 0.78877800  | 1.45651400  |
| H | -9.30925700  | -1.71267700 | -2.01067000 |
| C | -10.73296100 | -0.22408900 | -0.30895100 |
| H | -11.25398300 | -0.79132500 | -1.07935000 |
| C | -11.45875800 | 0.56462200  | 0.49280400  |
| H | -12.53564300 | 0.63145300  | 0.38037800  |
| H | -11.02023500 | 1.17016200  | 1.28063900  |

**[TS1]**

|    |             |             |             |
|----|-------------|-------------|-------------|
| C  | 1.55688400  | -0.31433200 | -1.56551100 |
| C  | 0.82753600  | 1.20938700  | 2.88800100  |
| C  | -0.36508500 | 1.36805600  | 2.09978300  |
| C  | 1.84595100  | 2.01813000  | 2.22859100  |
| C  | -0.06569200 | 2.13870500  | 0.94076700  |
| C  | 1.28277000  | 2.62083400  | 1.03577700  |
| Zr | 1.18025800  | -0.14278800 | 0.81792900  |
| C  | 1.82319800  | -1.40621300 | 2.84304100  |
| C  | 0.98328400  | -2.34178200 | 2.11358300  |
| C  | 3.06755200  | -1.34549600 | 2.10369600  |
| C  | 1.69952400  | -2.80403800 | 0.93983800  |
| C  | 2.95216400  | -2.11400700 | 0.92192300  |
| Si | 1.23980900  | -0.15455200 | 4.15063600  |
| C  | -0.24650400 | -0.71565400 | 5.16543400  |

|   |             |             |             |
|---|-------------|-------------|-------------|
| C | 2.57258600  | 0.28742500  | 5.40725900  |
| C | 1.14873300  | -3.80731200 | 0.07993600  |
| C | -0.32824000 | -2.83782600 | 2.36153600  |
| C | -0.12319600 | -4.27479100 | 0.39535700  |
| C | -0.85103800 | -3.79323800 | 1.51084100  |
| C | -1.76009800 | 0.90100500  | 2.44232300  |
| C | 4.38860800  | -0.76000400 | 2.53471400  |
| C | 1.89329600  | -4.35159900 | -1.08349600 |
| C | 1.99277500  | 3.67106100  | 0.34886100  |
| C | 3.13188000  | 2.42436300  | 2.68531500  |
| C | 3.25791900  | 3.98527100  | 0.82329000  |
| C | 3.82113000  | 3.37684800  | 1.97249700  |
| C | 1.37709200  | 4.52569800  | -0.69794600 |
| C | 3.23708700  | -4.75005500 | -0.96800400 |
| C | 3.91348600  | -5.29225900 | -2.05987400 |
| C | 3.26403400  | -5.43975700 | -3.28752300 |
| C | 1.24723700  | -4.51750100 | -2.32163000 |
| C | 1.92870600  | -5.05195500 | -3.41443100 |
| C | 0.58146400  | 3.99915000  | -1.72503400 |
| C | 0.02663300  | 4.82510300  | -2.70192400 |
| C | 0.24932200  | 6.20222100  | -2.66627700 |
| C | 1.58463500  | 5.91804000  | -0.66872600 |
| C | 1.02877000  | 6.74499300  | -1.64264100 |
| C | 2.44357500  | 0.46965000  | -2.53555500 |
| C | 3.75626000  | -0.26409900 | -2.85584100 |
| C | 4.63560600  | 0.40381800  | -3.93214000 |
| C | 0.11176500  | -0.17025600 | -1.59762000 |
| C | -0.67794300 | -0.96701500 | -0.70624300 |
| C | -2.07842600 | -0.76203700 | -0.57398500 |
| C | -2.74235600 | 0.20640200  | -1.30632200 |
| C | -0.59820900 | 0.80822800  | -2.35159100 |
| C | -1.96243700 | 0.96540200  | -2.22149000 |
| C | 5.80900900  | -0.51516000 | -4.30382700 |
| H | 4.27011100  | 1.39904900  | 0.25681900  |
| H | 4.23309500  | 0.82396800  | -0.21266100 |
| H | -0.79459400 | 2.43679400  | 0.20023000  |
| H | 3.74502600  | -2.25804300 | 0.20153500  |
| H | -0.44736400 | 0.04380300  | 5.92989100  |
| H | -1.17317900 | -0.86761800 | 4.61135500  |
| H | -0.00548000 | -1.64679800 | 5.69022200  |
| H | 2.31243000  | 1.21540400  | 5.92825000  |
| H | 2.60723800  | -0.50935400 | 6.15916300  |
| H | 3.58005600  | 0.39234300  | 5.00320500  |
| H | -0.87705200 | -2.53149100 | 3.24341500  |

|   |             |             |             |
|---|-------------|-------------|-------------|
| H | -0.55675200 | -5.06283100 | -0.21208200 |
| H | -1.82872400 | -4.21733100 | 1.71921900  |
| H | 3.52475500  | 2.05874200  | 3.62489900  |
| H | 3.82096700  | 4.76723700  | 0.32471600  |
| H | 4.79277800  | 3.71421100  | 2.32062700  |
| H | 3.74143800  | -4.67273500 | -0.00970900 |
| H | 4.94589100  | -5.60968600 | -1.94856500 |
| H | 3.79313600  | -5.86010400 | -4.13717000 |
| H | 0.21052100  | -4.21192700 | -2.43105400 |
| H | 1.41593700  | -5.16548700 | -4.36474900 |
| H | 0.41612600  | 2.93228100  | -1.76925300 |
| H | -0.57655700 | 4.39307500  | -3.49578000 |
| H | -0.18429200 | 6.84710100  | -3.42436600 |
| H | 2.16148400  | 6.35764900  | 0.13881500  |
| H | 1.19678400  | 7.81667300  | -1.59585800 |
| H | -2.44991500 | 1.14286600  | 1.63230300  |
| H | -1.83682800 | -0.17245000 | 2.63337300  |
| H | -2.10373500 | 1.41615300  | 3.34580200  |
| H | 5.12524900  | -0.86300400 | 1.73477400  |
| H | 4.34683600  | 0.29254000  | 2.80823300  |
| H | 4.75955700  | -1.31779800 | 3.40169600  |
| H | 2.65406000  | 1.47643300  | -2.15710700 |
| H | 4.35238900  | -0.38908600 | -1.93949800 |
| H | 3.50628000  | -1.27949500 | -3.19273400 |
| H | -0.30733400 | -1.94518500 | -0.40670300 |
| H | -2.62677300 | -1.42771400 | 0.08376800  |
| H | -0.06419500 | 1.39024600  | -3.09369200 |
| H | -2.46908100 | 1.68934500  | -2.85620800 |
| H | 1.84468600  | -1.36850000 | -1.52331900 |
| H | 1.90980900  | 0.61389400  | -3.48684700 |
| C | 5.14869800  | 1.78847200  | -3.50748300 |
| H | 6.41753600  | -0.07602800 | -5.10069700 |
| H | 6.46567200  | -0.68096000 | -3.44072900 |
| H | 5.45890600  | -1.49363100 | -4.64995700 |
| H | 4.01403700  | 0.53399400  | -4.83100700 |
| H | 5.77049900  | 2.22918500  | -4.29335000 |
| H | 4.33425900  | 2.49096600  | -3.30429000 |
| H | 5.76480100  | 1.71527800  | -2.60259700 |
| C | -4.23516000 | 0.46353900  | -1.22680600 |
| H | -4.38569100 | 1.46401000  | -0.79932400 |
| C | -5.05312400 | -0.56752600 | -0.43594100 |
| H | -4.83915500 | -1.56769200 | -0.83213800 |
| H | -4.63291000 | 0.52500100  | -2.24779000 |
| H | -4.71403700 | -0.57820600 | 0.61108000  |

|   |              |             |             |
|---|--------------|-------------|-------------|
| C | -6.55529900  | -0.34804900 | -0.47140000 |
| C | -7.13502400  | 0.92473000  | -0.40494600 |
| C | -7.41769100  | -1.45354900 | -0.53966200 |
| C | -8.51986000  | 1.08216600  | -0.40898500 |
| H | -6.51025900  | 1.81154100  | -0.34486700 |
| C | -8.79891600  | -1.29911600 | -0.54097100 |
| H | -6.99639800  | -2.45479100 | -0.59579000 |
| C | -9.38500500  | -0.02191800 | -0.47815800 |
| H | -8.94209700  | 2.08259700  | -0.35870000 |
| H | -9.42824700  | -2.18183300 | -0.59563000 |
| C | -10.83926700 | 0.20459800  | -0.48385100 |
| H | -11.13467400 | 1.25008800  | -0.40265500 |
| C | -11.80464600 | -0.71778500 | -0.57874400 |
| H | -11.59970600 | -1.78070000 | -0.66716800 |
| H | -12.85071300 | -0.43054700 | -0.57213600 |

# **[IM1]**

|    |             |             |             |
|----|-------------|-------------|-------------|
| C  | 1.60423200  | -0.24444700 | -1.67308700 |
| C  | 0.64475200  | 1.05645500  | 2.93738600  |
| C  | -0.53805300 | 1.10253900  | 2.11799500  |
| C  | 1.57791000  | 1.99747900  | 2.34249100  |
| C  | -0.31288600 | 1.98209000  | 1.02018200  |
| C  | 0.96829200  | 2.59828700  | 1.16611600  |
| Zr | 1.29593500  | -0.07982900 | 0.80349700  |
| C  | 1.88495100  | -1.43813400 | 2.79838500  |
| C  | 1.13127700  | -2.40124300 | 2.00898500  |
| C  | 3.14107400  | -1.26287700 | 2.10492400  |
| C  | 1.91767000  | -2.77839300 | 0.85194000  |
| C  | 3.11287700  | -2.00131400 | 0.89343500  |
| Si | 1.16581100  | -0.31293700 | 4.14955700  |
| C  | -0.27244600 | -1.04987100 | 5.11973800  |
| C  | 2.42381500  | 0.20423100  | 5.45547400  |
| C  | 1.47310200  | -3.79635300 | -0.05283900 |
| C  | -0.13073100 | -3.02974300 | 2.22077000  |
| C  | 0.24486200  | -4.38176800 | 0.21990800  |
| C  | -0.54651900 | -4.00153400 | 1.33605800  |
| C  | -1.87517100 | 0.46481100  | 2.40708200  |
| C  | 4.40612600  | -0.59882700 | 2.58966700  |
| C  | 2.28487000  | -4.22708200 | -1.22061900 |
| C  | 1.60156400  | 3.72243200  | 0.51550500  |
| C  | 2.83454900  | 2.48651900  | 2.81426100  |
| C  | 2.84527100  | 4.10243200  | 0.99502500  |
| C  | 3.45471900  | 3.49992600  | 2.12652400  |

|   |             |             |             |
|---|-------------|-------------|-------------|
| C | 0.92685500  | 4.56435300  | -0.50533200 |
| C | 3.65368300  | -4.52293500 | -1.09241600 |
| C | 4.39399300  | -4.95333000 | -2.19295400 |
| C | 3.78373600  | -5.09129700 | -3.44165200 |
| C | 1.68021700  | -4.38211100 | -2.48067300 |
| C | 2.42412600  | -4.80634800 | -3.58142400 |
| C | 0.14609800  | 4.02086300  | -1.53611800 |
| C | -0.46123600 | 4.83933200  | -2.48796400 |
| C | -0.30908400 | 6.22485500  | -2.42375900 |
| C | 1.06058300  | 5.96502900  | -0.44641300 |
| C | 0.45231400  | 6.78386300  | -1.39535500 |
| C | 2.36740700  | 0.61489500  | -2.67811800 |
| C | 3.87059700  | 0.30189800  | -2.74302900 |
| C | 4.64010900  | 1.04616900  | -3.85337700 |
| C | 0.15815600  | -0.19787300 | -1.63588000 |
| C | -0.55560800 | -1.07131400 | -0.75956300 |
| C | -1.96882200 | -0.99562500 | -0.63791000 |
| C | -2.71052600 | -0.07751000 | -1.35868500 |
| C | -0.62645500 | 0.74445300  | -2.36765300 |
| C | -1.99740000 | 0.77841000  | -2.24453400 |
| C | 6.07626700  | 0.51162400  | -3.95489300 |
| H | 3.10621800  | 0.93734500  | 0.49361300  |
| H | 2.90812500  | 0.72320300  | -0.23372500 |
| H | -1.05386000 | 2.22459300  | 0.27166500  |
| H | 3.93465400  | -2.06392900 | 0.19327500  |
| H | -0.54579200 | -0.34303700 | 5.91173500  |
| H | -1.17678800 | -1.25974800 | 4.54851900  |
| H | 0.04583400  | -1.97658000 | 5.61008300  |
| H | 2.05140000  | 1.06981800  | 6.01456400  |
| H | 2.52964900  | -0.62158800 | 6.16841400  |
| H | 3.42295200  | 0.44081600  | 5.08817000  |
| H | -0.72449000 | -2.80036700 | 3.09688100  |
| H | -0.10712900 | -5.18479700 | -0.42013700 |
| H | -1.48433500 | -4.52013000 | 1.51103400  |
| H | 3.25557400  | 2.11734900  | 3.74010400  |
| H | 3.35389900  | 4.93414800  | 0.51898200  |
| H | 4.40353300  | 3.89191000  | 2.48007700  |
| H | 4.13082900  | -4.45341400 | -0.11961300 |
| H | 5.44626100  | -5.19275300 | -2.07206400 |
| H | 4.36223300  | -5.42537400 | -4.29743000 |
| H | 0.62439500  | -4.15518200 | -2.59873800 |
| H | 1.94098300  | -4.91432100 | -4.54785400 |
| H | 0.02909000  | 2.94857600  | -1.60519900 |
| H | -1.05219600 | 4.39433700  | -3.28379200 |

|   |              |             |             |
|---|--------------|-------------|-------------|
| H | -0.78449500  | 6.86319900  | -3.16203800 |
| H | 1.62092900   | 6.41657700  | 0.36605600  |
| H | 0.56443900   | 7.86150800  | -1.32450700 |
| H | -2.58395300  | 0.69530500  | 1.61058800  |
| H | -1.82996000  | -0.62244600 | 2.50381400  |
| H | -2.27869100  | 0.86421800  | 3.34342400  |
| H | 5.12501700   | -0.50755300 | 1.77049300  |
| H | 4.25789000   | 0.39294000  | 3.01187400  |
| H | 4.86776500   | -1.22406400 | 3.36237300  |
| H | 2.21146400   | 1.68060300  | -2.47228300 |
| H | 4.35271500   | 0.53010000  | -1.77962800 |
| H | 3.99250800   | -0.77904000 | -2.89587100 |
| H | -0.09298900  | -2.00279800 | -0.45111900 |
| H | -2.46155000  | -1.71995200 | 0.00118800  |
| H | -0.13902800  | 1.39022800  | -3.08872600 |
| H | -2.56436900  | 1.47044600  | -2.86354500 |
| H | 1.99186600   | -1.26427800 | -1.62100300 |
| H | 1.94701100   | 0.43835500  | -3.68086500 |
| C | 4.64326000   | 2.56904100  | -3.64932900 |
| H | 6.62248400   | 0.99968800  | -4.76817100 |
| H | 6.63141200   | 0.69803800  | -3.02701700 |
| H | 6.09126200   | -0.56742700 | -4.14250400 |
| H | 4.13354100   | 0.83190400  | -4.80637600 |
| H | 5.20841300   | 3.06583000  | -4.44424600 |
| H | 3.63485700   | 2.99448600  | -3.65282200 |
| H | 5.11727400   | 2.83324300  | -2.69518100 |
| C | -4.22187600  | 0.02964600  | -1.29894000 |
| H | -4.49265300  | 1.01404300  | -0.89130300 |
| C | -4.95639100  | -1.05929300 | -0.49449900 |
| H | -4.69138400  | -2.04517600 | -0.89580900 |
| H | -4.61127400  | 0.03126600  | -2.32529900 |
| H | -4.61590900  | -1.03910000 | 0.54863900  |
| C | -6.45906000  | -0.88027300 | -0.53621600 |
| C | -7.23131400  | -1.49396900 | -1.52874600 |
| C | -7.11516800  | -0.06547400 | 0.39887400  |
| C | -8.60939500  | -1.29672100 | -1.58606400 |
| H | -6.75223400  | -2.13915400 | -2.26182500 |
| C | -8.49008300  | 0.13346400  | 0.34336900  |
| H | -6.53993200  | 0.41405900  | 1.18831800  |
| C | -9.27053300  | -0.47756000 | -0.65545900 |
| H | -9.18832600  | -1.78830200 | -2.36369100 |
| H | -8.96346300  | 0.76391700  | 1.08953400  |
| C | -10.72832900 | -0.30422100 | -0.76315700 |
| H | -11.19351200 | -0.87658100 | -1.56488100 |

|   |              |            |             |
|---|--------------|------------|-------------|
| C | -11.51391000 | 0.46602400 | -0.00075100 |
| H | -11.13338900 | 1.07278100 | 0.81572900  |
| H | -12.58341700 | 0.51446800 | -0.17567700 |

**[TS2]**

|    |             |             |             |
|----|-------------|-------------|-------------|
| C  | 1.62289700  | -0.26789800 | -1.70680600 |
| C  | 0.63814000  | 1.09433500  | 2.96544700  |
| C  | -0.53753500 | 1.13160900  | 2.13335900  |
| C  | 1.57282900  | 2.04069600  | 2.37829400  |
| C  | -0.30009300 | 2.00244700  | 1.03093000  |
| C  | 0.97673800  | 2.62792600  | 1.19175300  |
| Zr | 1.28710900  | -0.05477700 | 0.85230100  |
| C  | 1.88058600  | -1.39687500 | 2.84280700  |
| C  | 1.12911000  | -2.37075600 | 2.06189100  |
| C  | 3.13901200  | -1.22621500 | 2.14959800  |
| C  | 1.91591000  | -2.75426700 | 0.90850400  |
| C  | 3.11136200  | -1.97558500 | 0.94744100  |
| Si | 1.15712300  | -0.26647900 | 4.18763000  |
| C  | -0.28425000 | -0.99852100 | 5.15700900  |
| C  | 2.41567100  | 0.25397700  | 5.49111100  |
| C  | 1.47528600  | -3.78291300 | 0.01298500  |
| C  | -0.12875400 | -3.00393200 | 2.28113900  |
| C  | 0.25055700  | -4.37229000 | 0.29227500  |
| C  | -0.54116900 | -3.98587200 | 1.40577200  |
| C  | -1.87588500 | 0.49088000  | 2.40980800  |
| C  | 4.39539100  | -0.53893000 | 2.62103300  |
| C  | 2.28740800  | -4.22002800 | -1.15244800 |
| C  | 1.61425900  | 3.74608900  | 0.53847400  |
| C  | 2.81636200  | 2.54010400  | 2.86564100  |
| C  | 2.84304700  | 4.14624900  | 1.04013400  |
| C  | 3.43717100  | 3.55865200  | 2.18552300  |
| C  | 0.95675900  | 4.56194300  | -0.51423500 |
| C  | 3.65925700  | -4.50271000 | -1.02600800 |
| C  | 4.39932300  | -4.94005100 | -2.12403200 |
| C  | 3.78594000  | -5.09897100 | -3.36870100 |
| C  | 1.68003800  | -4.39545400 | -2.40875800 |
| C  | 2.42342500  | -4.82740400 | -3.50694300 |
| C  | 0.22548500  | 3.98774400  | -1.56421900 |
| C  | -0.36592400 | 4.77923900  | -2.54836500 |
| C  | -0.24584700 | 6.16858200  | -2.49847600 |
| C  | 1.05967700  | 5.96541000  | -0.47135300 |
| C  | 0.46761000  | 6.75777900  | -1.45271300 |
| C  | 2.34877000  | 0.52172000  | -2.80016400 |



|   |             |             |             |
|---|-------------|-------------|-------------|
| C | 3.85815600  | 0.23948200  | -2.85295300 |
| C | 4.60163900  | 0.92316400  | -4.01855800 |
| C | 0.15849400  | -0.20802200 | -1.64424800 |
| C | -0.55293700 | -1.07924700 | -0.77310200 |
| C | -1.96265900 | -1.01257500 | -0.65841900 |
| C | -2.70612200 | -0.10014700 | -1.39067700 |
| C | -0.61937500 | 0.71992100  | -2.39005800 |
| C | -1.99424100 | 0.75200200  | -2.27441500 |
| C | 6.04561700  | 0.40651000  | -4.10259100 |
| H | 2.89810500  | 0.78500100  | 0.20475700  |
| H | 2.50946100  | 0.46848000  | -0.57851300 |
| H | -1.03320800 | 2.24125200  | 0.27294400  |
| H | 3.93215600  | -2.03676800 | 0.24591000  |
| H | -0.55485400 | -0.28962900 | 5.94815000  |
| H | -1.18911500 | -1.20354000 | 4.58469500  |
| H | 0.02863200  | -1.92649100 | 5.64838400  |
| H | 2.04955100  | 1.12614600  | 6.04401200  |
| H | 2.51631800  | -0.56742200 | 6.20993100  |
| H | 3.41578400  | 0.48042500  | 5.11995400  |
| H | -0.72256300 | -2.76990300 | 3.15602900  |
| H | -0.09761400 | -5.18352500 | -0.33946700 |
| H | -1.47573100 | -4.50804700 | 1.58748500  |
| H | 3.22771200  | 2.17702900  | 3.79828200  |
| H | 3.35217700  | 4.97836400  | 0.56495100  |
| H | 4.37613900  | 3.96125500  | 2.55304900  |
| H | 4.13924000  | -4.41804600 | -0.05588400 |
| H | 5.45400400  | -5.16901400 | -2.00397300 |
| H | 4.36416400  | -5.43915600 | -4.22224900 |
| H | 0.62155500  | -4.18036000 | -2.52553300 |
| H | 1.93755100  | -4.95227200 | -4.46998900 |
| H | 0.13530500  | 2.91191100  | -1.62042500 |
| H | -0.91864000 | 4.31097100  | -3.35832200 |
| H | -0.70845000 | 6.78642400  | -3.26190000 |
| H | 1.58372700  | 6.43914600  | 0.35271000  |
| H | 0.55510600  | 7.83846200  | -1.39425400 |
| H | -2.57277600 | 0.70619100  | 1.59827000  |
| H | -1.82677700 | -0.59466600 | 2.52366900  |
| H | -2.29822100 | 0.90164700  | 3.33292100  |
| H | 5.11882000  | -0.47398500 | 1.80393100  |
| H | 4.23597000  | 0.46906700  | 2.99825700  |
| H | 4.85288200  | -1.12964500 | 3.42294800  |
| H | 2.16991200  | 1.59597000  | -2.67434800 |
| H | 4.33262100  | 0.54866400  | -1.90924700 |
| H | 4.00552900  | -0.84624200 | -2.93138500 |

|   |              |             |             |
|---|--------------|-------------|-------------|
| H | -0.07084600  | -1.98204600 | -0.41282700 |
| H | -2.45458100  | -1.73163600 | -0.01304200 |
| H | -0.13123400  | 1.36741600  | -3.10867400 |
| H | -2.55848200  | 1.44237300  | -2.89744500 |
| H | 1.98811300   | -1.29568700 | -1.64604400 |
| H | 1.90906400   | 0.24804000  | -3.77106200 |
| C | 4.58133900   | 2.45575900  | -3.91163100 |
| H | 6.57494100   | 0.85227400  | -4.95054800 |
| H | 6.60684500   | 0.65877900  | -3.19431200 |
| H | 6.07691800   | -0.68169700 | -4.22367900 |
| H | 4.08863500   | 0.63947300  | -4.94983400 |
| H | 5.12567600   | 2.90973600  | -4.74567000 |
| H | 3.56589900   | 2.86410100  | -3.92601000 |
| H | 5.06451000   | 2.78735900  | -2.98382600 |
| C | -4.21795700  | 0.00299000  | -1.33321300 |
| H | -4.48977100  | 0.99339700  | -0.94174000 |
| C | -4.95111300  | -1.07348600 | -0.51103600 |
| H | -4.60790000  | -1.03839300 | 0.53081400  |
| H | -4.60650900  | -0.01265000 | -2.35968300 |
| H | -4.68938600  | -2.06576600 | -0.89850500 |
| C | -6.45351800  | -0.89115100 | -0.55177400 |
| C | -7.23047500  | -1.52025900 | -1.53084600 |
| C | -7.10405900  | -0.05697900 | 0.37001900  |
| C | -8.60795100  | -1.31864400 | -1.58852200 |
| H | -6.75574600  | -2.18082300 | -2.25297200 |
| C | -8.47827400  | 0.14635500  | 0.31401200  |
| H | -6.52518900  | 0.43426900  | 1.14954200  |
| C | -9.26340700  | -0.47927100 | -0.67205200 |
| H | -9.19068800  | -1.82205600 | -2.35564100 |
| H | -8.94759700  | 0.79145000  | 1.05012600  |
| C | -10.72054600 | -0.30039700 | -0.78014000 |
| H | -11.19213200 | -0.89309100 | -1.56310000 |
| C | -11.49805000 | 0.49793000  | -0.03862300 |
| H | -11.10994600 | 1.12704800  | 0.75707200  |
| H | -12.56789800 | 0.54832600  | -0.21084100 |

## [IM2]

|   |             |             |             |
|---|-------------|-------------|-------------|
| C | 2.77443000  | -1.45989500 | 2.20978400  |
| C | 0.11280800  | 2.01066300  | -2.83250100 |
| C | -0.58848100 | 0.76244300  | -2.66517100 |
| C | 1.52850400  | 1.66834400  | -2.85744300 |
| C | 0.35475400  | -0.28475700 | -2.48569700 |
| C | 1.67836800  | 0.24066500  | -2.66502900 |

|    |             |             |             |
|----|-------------|-------------|-------------|
| Zr | 0.53829600  | 1.35414200  | -0.50009200 |
| C  | -0.29601200 | 3.66992900  | -0.62870300 |
| C  | -1.22570500 | 3.05970500  | 0.31061000  |
| C  | 0.95540600  | 3.79833700  | 0.09011100  |
| C  | -0.53094500 | 2.79317200  | 1.55408500  |
| C  | 0.82808300  | 3.19669500  | 1.36202200  |
| Si | -0.55313800 | 3.76396300  | -2.51052100 |
| C  | -2.34319600 | 3.99451300  | -3.05407600 |
| C  | 0.41070900  | 5.15547200  | -3.33872200 |
| C  | -1.23042800 | 2.30308400  | 2.70869700  |
| C  | -2.61861900 | 2.76833500  | 0.22307500  |
| C  | -2.58739200 | 2.05686600  | 2.56081500  |
| C  | -3.26927000 | 2.27826400  | 1.33561000  |
| C  | -2.07644000 | 0.52011000  | -2.73991900 |
| C  | 2.20468500  | 4.53431100  | -0.31687000 |
| C  | -0.55564000 | 2.10344100  | 4.01687300  |
| C  | 2.96014400  | -0.38799100 | -2.82536400 |
| C  | 2.67677600  | 2.46312000  | -3.12171000 |
| C  | 4.04045900  | 0.44904600  | -3.07168000 |
| C  | 3.90661900  | 1.84924600  | -3.20995000 |
| C  | 3.14003800  | -1.86051300 | -2.88084900 |
| C  | 0.30547100  | 3.07897400  | 4.55151900  |
| C  | 0.90329300  | 2.89492500  | 5.79766000  |
| C  | 0.65731500  | 1.73274900  | 6.53170000  |
| C  | -0.80323300 | 0.94310600  | 4.77257200  |
| C  | -0.20001400 | 0.75870300  | 6.01619200  |
| C  | 2.50058400  | -2.73118600 | -1.98492100 |
| C  | 2.69779900  | -4.11022800 | -2.06168500 |
| C  | 3.53322100  | -4.64961600 | -3.04103100 |
| C  | 3.97539200  | -2.41916800 | -3.86630100 |
| C  | 4.17056700  | -3.79664700 | -3.94411900 |
| C  | 3.75911600  | -2.61465300 | 1.98562300  |
| C  | 5.14328600  | -2.31407100 | 2.57772600  |
| C  | 6.16539200  | -3.46285500 | 2.46401500  |
| C  | 1.39571400  | -1.61950200 | 1.59772800  |
| C  | 0.51650900  | -0.51963100 | 1.56094900  |
| C  | -0.78026400 | -0.63028800 | 1.02403700  |
| C  | -1.25457400 | -1.85636600 | 0.51610600  |
| C  | 0.90394800  | -2.83754800 | 1.10840700  |
| C  | -0.38515800 | -2.95150800 | 0.58009400  |
| C  | 7.44160000  | -3.11805900 | 3.24612600  |
| H  | 2.31352000  | 1.28551100  | -0.11462600 |
| H  | 3.21215700  | -0.53149200 | 1.82045800  |
| H  | 0.09859000  | -1.33064300 | -2.38377300 |

|   |              |              |              |
|---|--------------|--------------|--------------|
| H | 1. 61760100  | 3. 15446900  | 2. 09908900  |
| H | -2. 35458500 | 4. 12818500  | -4. 14198800 |
| H | -3. 01825800 | 3. 17004500  | -2. 82341100 |
| H | -2. 75384200 | 4. 90872200  | -2. 61134700 |
| H | 0. 46629500  | 4. 98330100  | -4. 41934200 |
| H | -0. 14256700 | 6. 08940600  | -3. 18636200 |
| H | 1. 42301900  | 5. 31699600  | -2. 96672500 |
| H | -3. 17655800 | 3. 00118900  | -0. 67518900 |
| H | -3. 15742100 | 1. 72817600  | 3. 42422600  |
| H | -4. 33938300 | 2. 09903200  | 1. 29356500  |
| H | 2. 57907700  | 3. 52040200  | -3. 33099600 |
| H | 5. 02502900  | 0. 00811800  | -3. 18857900 |
| H | 4. 78920400  | 2. 44096700  | -3. 43273100 |
| H | 0. 47445400  | 4. 00364200  | 4. 00878000  |
| H | 1. 55255900  | 3. 66624400  | 6. 20083100  |
| H | 1. 12451900  | 1. 59076000  | 7. 50131300  |
| H | -1. 46324500 | 0. 17711300  | 4. 37576200  |
| H | -0. 40049900 | -0. 14585200 | 6. 58253600  |
| H | 1. 87078600  | -2. 32709600 | -1. 20285100 |
| H | 2. 19924500  | -4. 76600000 | -1. 35327500 |
| H | 3. 68266600  | -5. 72310500 | -3. 10330100 |
| H | 4. 45297400  | -1. 76965800 | -4. 59325900 |
| H | 4. 81381300  | -4. 20466200 | -4. 71785800 |
| H | -2. 29347600 | -0. 54263300 | -2. 61417900 |
| H | -2. 65171400 | 1. 06730800  | -1. 98855700 |
| H | -2. 45323200 | 0. 82042200  | -3. 72303200 |
| H | 3. 01976900  | 4. 30285700  | 0. 37287700  |
| H | 2. 54822200  | 4. 29368100  | -1. 32093700 |
| H | 2. 02151600  | 5. 61425600  | -0. 27374600 |
| H | 3. 84387200  | -2. 81145700 | 0. 91037700  |
| H | 5. 55845200  | -1. 41818700 | 2. 09237300  |
| H | 5. 02336900  | -2. 05661500 | 3. 63930300  |
| H | 0. 81801800  | 0. 39562400  | 2. 06978600  |
| H | -1. 48321600 | 0. 19639000  | 1. 12436500  |
| H | 1. 53558300  | -3. 71863300 | 1. 13873600  |
| H | -0. 72215200 | -3. 91914000 | 0. 21667400  |
| H | 2. 64868600  | -1. 29630000 | 3. 29005700  |
| H | 3. 36886700  | -3. 53287400 | 2. 44542300  |
| C | 6. 50356500  | -3. 80862700 | 1. 00533400  |
| H | 8. 16211500  | -3. 94145900 | 3. 21001400  |
| H | 7. 93107500  | -2. 23137500 | 2. 82518800  |
| H | 7. 22372100  | -2. 91003800 | 4. 29925000  |
| H | 5. 71672400  | -4. 35393600 | 2. 92900700  |
| H | 7. 24350700  | -4. 61423600 | 0. 95911900  |

|   |              |             |             |
|---|--------------|-------------|-------------|
| H | 5.62695500   | -4.13742400 | 0.43832900  |
| H | 6.92933100   | -2.93962200 | 0.48815900  |
| C | -2.67412700  | -2.00902900 | 0.02277500  |
| H | -3.09395700  | -1.02677700 | -0.21646900 |
| H | -2.68758500  | -2.59470000 | -0.90420100 |
| C | -3.60624300  | -2.70492700 | 1.05315700  |
| H | -3.20045400  | -3.69584900 | 1.28737800  |
| H | -3.59145600  | -2.13030100 | 1.98688800  |
| C | -5.02377500  | -2.82914800 | 0.54141300  |
| C | -5.97647300  | -1.83340300 | 0.80573000  |
| C | -5.41513800  | -3.91969100 | -0.24424400 |
| C | -7.26973000  | -1.91954600 | 0.30208100  |
| H | -5.70242200  | -0.98344100 | 1.42760400  |
| C | -6.70979000  | -4.00782600 | -0.75077200 |
| H | -4.70341100  | -4.71450500 | -0.45652200 |
| C | -7.66653600  | -3.01165600 | -0.49143000 |
| H | -7.98111900  | -1.13306700 | 0.53389000  |
| H | -6.99141400  | -4.86779300 | -1.35288900 |
| C | -9.02126000  | -3.15761800 | -1.04847700 |
| H | -9.16587300  | -4.04832300 | -1.65864700 |
| C | -10.06105600 | -2.33125400 | -0.88203100 |
| H | -10.00628500 | -1.42539200 | -0.28535900 |
| H | -11.01940700 | -2.54348100 | -1.34379800 |

#### **BVPE-PP<sub>1</sub>**

|   |             |             |             |
|---|-------------|-------------|-------------|
| C | 4.20930700  | -0.84638600 | 0.99880100  |
| C | 4.99874900  | -0.04405100 | -0.05573800 |
| C | 6.50748700  | -0.02333300 | 0.21930100  |
| C | 7.36357100  | 0.67560900  | -0.85554800 |
| C | -3.89762700 | 0.18809900  | 0.16509600  |
| C | -4.73984700 | 1.16741300  | 0.72162900  |
| C | -6.10237600 | 1.19026200  | 0.46227700  |
| C | -6.69639000 | 0.22567000  | -0.37428100 |
| C | -4.48512500 | -0.76979000 | -0.66644800 |
| C | -5.85584300 | -0.74911000 | -0.92920600 |
| C | 8.85829000  | 0.48338800  | -0.55977200 |
| H | 4.60077500  | 0.97706900  | -0.08731100 |
| H | 6.69396100  | 0.45773000  | 1.19136600  |
| H | 6.85960800  | -1.05933600 | 0.32442500  |
| H | -4.31038500 | 1.92634300  | 1.37207400  |
| H | -6.71336400 | 1.96605600  | 0.91359200  |
| H | -3.87894200 | -1.54623000 | -1.12096300 |
| H | -6.28355300 | -1.50789500 | -1.58006600 |

|   |              |             |             |
|---|--------------|-------------|-------------|
| H | 4.58885200   | -1.87598300 | 1.02161900  |
| H | 4.80943700   | -0.47568900 | -1.04805500 |
| C | 7.03030600   | 2.16854300  | -0.99611700 |
| H | 9.47984000   | 0.93634900  | -1.33970900 |
| H | 9.13120300   | 0.95143600  | 0.39406700  |
| H | 9.12104900   | -0.57822000 | -0.49572100 |
| H | 7.14720800   | 0.18976100  | -1.81927500 |
| H | 7.66503200   | 2.64145000  | -1.75327400 |
| H | 5.98956900   | 2.33329200  | -1.29046400 |
| H | 7.19699700   | 2.69592400  | -0.04844300 |
| C | -8.13381200  | 0.19734500  | -0.68494200 |
| H | -8.43310500  | -0.60586800 | -1.35790500 |
| C | -9.08313900  | 1.02943000  | -0.23947300 |
| H | -8.87388000  | 1.85466300  | 0.43460300  |
| H | -10.11780600 | 0.90647000  | -0.54152100 |
| H | 4.40731800   | -0.42154300 | 1.99112700  |
| C | -2.41487900  | 0.22583300  | 0.49379400  |
| H | -2.01966800  | 1.20564400  | 0.19269400  |
| H | -2.30347000  | 0.18892400  | 1.58594300  |
| C | -1.55960700  | -0.87517200 | -0.13570300 |
| H | -1.67216400  | -0.83767400 | -1.22763700 |
| H | -1.95499600  | -1.85435600 | 0.16670300  |
| C | -0.07560500  | -0.83379400 | 0.19356400  |
| C | 0.76711200   | -1.81399100 | -0.35335000 |
| C | 0.50828800   | 0.13067300  | 1.02162400  |
| C | 2.13247500   | -1.82773600 | -0.08599800 |
| H | 0.34169300   | -2.58153400 | -0.99656500 |
| C | 1.87945500   | 0.11594700  | 1.28946600  |
| H | -0.10187600  | 0.90597000  | 1.47333500  |
| C | 2.71820700   | -0.85908700 | 0.74213700  |
| H | 2.75553900   | -2.60500000 | -0.52278300 |
| H | 2.30115000   | 0.87768600  | 1.94146500  |

### IM3<sub>1,2</sub>

|    |             |             |             |
|----|-------------|-------------|-------------|
| C  | -5.82996300 | 1.19320400  | 0.13756200  |
| C  | 3.88697400  | -1.56702500 | 0.34545200  |
| C  | 3.58344900  | -1.63856400 | -1.06495100 |
| C  | 2.83166300  | -2.31979200 | 1.01256400  |
| C  | 2.33992500  | -2.29797800 | -1.24279800 |
| C  | 1.87879000  | -2.78158300 | 0.02686500  |
| Zr | 1.91819400  | -0.11807300 | 0.04939000  |
| C  | 3.73116700  | 1.10786300  | 1.17508800  |
| C  | 3.45424900  | 1.94548400  | 0.01679800  |

|    |              |             |             |
|----|--------------|-------------|-------------|
| C  | 2.59544700   | 1.27640600  | 2.05659400  |
| C  | 2.16099500   | 2.57785000  | 0.18632300  |
| C  | 1.62805800   | 2.09248900  | 1.42335600  |
| Si | 5.01714800   | -0.29577800 | 1.20558300  |
| C  | 6.60183600   | 0.05900900  | 0.24869800  |
| C  | 5.56466100   | -0.77044000 | 2.94520900  |
| C  | 1.68850000   | 3.55854400  | -0.75337200 |
| C  | 4.22974400   | 2.25515300  | -1.13885400 |
| C  | 2.48984400   | 3.80679300  | -1.85742500 |
| C  | 3.73648600   | 3.15951100  | -2.05323800 |
| C  | 4.42956700   | -1.18805600 | -2.23127100 |
| C  | 2.41870300   | 0.76819200  | 3.46415100  |
| C  | 0.43646900   | 4.33193200  | -0.54652700 |
| C  | 0.77083200   | -3.61126600 | 0.39973700  |
| C  | 2.63951400   | -2.66929600 | 2.37708000  |
| C  | 0.64531200   | -3.92082700 | 1.74669600  |
| C  | 1.56082300   | -3.45683000 | 2.71922600  |
| C  | -0.16925300  | -4.18721100 | -0.59534700 |
| C  | 0.09155000   | 4.84662200  | 0.71666300  |
| C  | -1.06185800  | 5.61156400  | 0.88565400  |
| C  | -1.89681100  | 5.87952700  | -0.20148400 |
| C  | -0.40888500  | 4.62029000  | -1.63456800 |
| C  | -1.56404600  | 5.38327600  | -1.46374700 |
| C  | 0.28901700   | -4.74486800 | -1.80334700 |
| C  | -0.60095100  | -5.33138300 | -2.70363900 |
| C  | -1.96633000  | -5.37611000 | -2.41620000 |
| C  | -1.54710800  | -4.24632500 | -0.31623700 |
| C  | -2.43510800  | -4.83565300 | -1.21645000 |
| C  | -6.88219700  | 0.09111000  | 0.30249200  |
| C  | -8.22215400  | 0.64767500  | 0.80527600  |
| C  | -9.35814500  | -0.38816300 | 0.92332900  |
| C  | -4.45867100  | 0.77382300  | -0.34940200 |
| C  | -3.44804100  | 1.75258300  | -0.46437400 |
| C  | -2.18129600  | 1.43449800  | -0.91812500 |
| C  | -1.86210600  | 0.10369600  | -1.27483700 |
| C  | -4.14170800  | -0.54502900 | -0.70561100 |
| C  | -2.86853600  | -0.87628300 | -1.15756500 |
| C  | -10.68647300 | 0.31338600  | 1.24379500  |
| H  | 0.56032900   | -0.54755800 | 1.18633400  |
| H  | 1.89613000   | -2.51552000 | -2.20497400 |
| H  | 0.68104600   | 2.36764800  | 1.86563000  |
| H  | 7.30774800   | -0.75641800 | 0.44425700  |
| H  | 6.49180400   | 0.13735600  | -0.83319800 |
| H  | 7.06385300   | 0.98281500  | 0.61407600  |

|   |              |             |             |
|---|--------------|-------------|-------------|
| H | 6.08157300   | -1.73634200 | 2.92618000  |
| H | 6.28683000   | -0.02228900 | 3.29219200  |
| H | 4.77148500   | -0.82293400 | 3.69184800  |
| H | 5.22595700   | 1.84869400  | -1.26114500 |
| H | 2.18706500   | 4.57178500  | -2.56529700 |
| H | 4.33654100   | 3.43193400  | -2.91616000 |
| H | 3.36917400   | -2.38718400 | 3.12550000  |
| H | -0.15449600  | -4.58429400 | 2.05972500  |
| H | 1.42686000   | -3.76327500 | 3.75208900  |
| H | 0.75150500   | 4.68428700  | 1.56231300  |
| H | -1.30058700  | 6.01182400  | 1.86646400  |
| H | -2.79181100  | 6.47956200  | -0.06839800 |
| H | -0.16349700  | 4.23555400  | -2.62063800 |
| H | -2.20155700  | 5.59136600  | -2.31785800 |
| H | 1.35276800   | -4.76449600 | -2.01786400 |
| H | -0.22363100  | -5.77007900 | -3.62255900 |
| H | -2.65724600  | -5.83750500 | -3.11498400 |
| H | -1.92135600  | -3.81815700 | 0.60905300  |
| H | -3.49422100  | -4.87602500 | -0.97866600 |
| H | 3.90375000   | -1.36901200 | -3.17301700 |
| H | 4.69800800   | -0.13082200 | -2.20150500 |
| H | 5.36049900   | -1.76418300 | -2.25864500 |
| H | 1.40461100   | 0.97571000  | 3.81364700  |
| H | 2.58461200   | -0.30427000 | 3.56455200  |
| H | 3.11980500   | 1.28074600  | 4.13244700  |
| H | -6.50647500  | -0.66857200 | 0.99852300  |
| H | -8.07262800  | 1.12657300  | 1.78426500  |
| H | -8.54710000  | 1.44636300  | 0.12408900  |
| H | -3.67238200  | 2.78225300  | -0.19889600 |
| H | -1.43946300  | 2.22045600  | -1.00166000 |
| H | -4.89531900  | -1.32082300 | -0.63268900 |
| H | -2.64527700  | -1.90414800 | -1.42818300 |
| H | -6.21203500  | 1.95787200  | -0.55446200 |
| H | -7.04223000  | -0.41552000 | -0.65898900 |
| C | -9.05770500  | -1.47534800 | 1.96668000  |
| H | -11.51131900 | -0.40475200 | 1.29351900  |
| H | -10.63539500 | 0.82621300  | 2.21195700  |
| H | -10.93870300 | 1.06085000  | 0.48389600  |
| H | -9.46460800  | -0.87789900 | -0.05661600 |
| H | -9.88800800  | -2.18535800 | 2.03817900  |
| H | -8.15787000  | -2.04997800 | 1.72417500  |
| H | -8.91508000  | -1.03294300 | 2.96040100  |
| C | -0.56912000  | -0.29045700 | -1.78919800 |
| H | -0.48090900  | -1.35157500 | -2.02334800 |



|   |             |            |             |
|---|-------------|------------|-------------|
| C | 0.53232100  | 0.49974700 | -2.02080800 |
| H | -5.70153200 | 1.71814800 | 1.09487500  |
| H | 1.33480200  | 0.09576800 | -2.64002400 |
| H | 0.47356300  | 1.58152700 | -1.95965700 |

### TS3<sub>1,2</sub>

|    |             |             |             |
|----|-------------|-------------|-------------|
| C  | 5.70044400  | -0.32196900 | 1.53069500  |
| C  | -4.09022100 | 0.63037100  | 0.82186400  |
| C  | -4.19353000 | 0.75486100  | -0.61465500 |
| C  | -3.15676100 | 1.67126000  | 1.23707100  |
| C  | -3.28646300 | 1.74814000  | -1.07053400 |
| C  | -2.67897400 | 2.37815900  | 0.06545400  |
| Zr | -1.91746400 | -0.15497600 | -0.02624600 |
| C  | -2.93441600 | -1.87955700 | 1.41281800  |
| C  | -2.76270300 | -2.55673600 | 0.13315900  |
| C  | -1.59879000 | -1.70804000 | 1.94204100  |
| C  | -1.34743700 | -2.73911800 | -0.12367900 |
| C  | -0.65141800 | -2.16300200 | 0.98794300  |
| Si | -4.51114000 | -0.90631800 | 1.87425800  |
| C  | -6.12649500 | -1.73727900 | 1.36998800  |
| C  | -4.67213200 | -0.57162100 | 3.72200300  |
| C  | -0.89495200 | -3.43839100 | -1.29704600 |
| C  | -3.70844300 | -3.06406600 | -0.80679400 |
| C  | -1.86440000 | -3.87604700 | -2.18326200 |
| C  | -3.25164900 | -3.69511800 | -1.94143400 |
| C  | -5.15592600 | 0.06415600  | -1.54938500 |
| C  | -1.19152000 | -1.19747100 | 3.30189200  |
| C  | 0.53790000  | -3.74627800 | -1.53915500 |
| C  | -1.80564300 | 3.51011400  | 0.18723000  |
| C  | -2.69940600 | 2.07928300  | 2.52282400  |
| C  | -1.41552600 | 3.86694600  | 1.47076600  |
| C  | -1.84946000 | 3.16137100  | 2.61861500  |
| C  | -1.36275200 | 4.29916700  | -0.99076300 |
| C  | 1.34836900  | -4.28345300 | -0.52356000 |
| C  | 2.67617100  | -4.62471200 | -0.77936000 |
| C  | 3.22294200  | -4.42822400 | -2.04991400 |
| C  | 1.09790000  | -3.56280600 | -2.81660500 |
| C  | 2.42912800  | -3.89550900 | -3.06822400 |
| C  | -2.26531900 | 4.67788100  | -2.00131300 |
| C  | -1.84012400 | 5.44245800  | -3.08683800 |
| C  | -0.50533400 | 5.84054700  | -3.18905300 |
| C  | -0.02526100 | 4.72245800  | -1.09909300 |
| C  | 0.40003600  | 5.48095100  | -2.18939200 |

|   |             |             |             |
|---|-------------|-------------|-------------|
| C | 6.83056800  | 0.33402900  | 0.70617800  |
| C | 8.22130000  | 0.05780800  | 1.29231200  |
| C | 9.39984900  | 0.60048800  | 0.45876500  |
| C | 4.32877500  | -0.04865200 | 0.96129100  |
| C | 3.76351700  | -0.89538200 | -0.00364700 |
| C | 2.51961000  | -0.62511700 | -0.56893300 |
| C | 1.79538600  | 0.51327300  | -0.17987100 |
| C | 3.60134800  | 1.09150600  | 1.34408800  |
| C | 2.36177400  | 1.36924400  | 0.78341700  |
| C | 10.73435100 | 0.11188800  | 1.04172600  |
| H | -0.43371800 | 0.72928700  | 0.66111300  |
| H | -3.18849900 | 2.06404400  | -2.10013000 |
| H | 0.42085000  | -2.14410300 | 1.12799100  |
| H | -6.95359600 | -1.16186200 | 1.80163800  |
| H | -6.31076000 | -1.80913800 | 0.29752100  |
| H | -6.17660500 | -2.74621100 | 1.79427100  |
| H | -5.42292000 | 0.20695200  | 3.89685400  |
| H | -5.03463200 | -1.48693800 | 4.20392600  |
| H | -3.75395200 | -0.28072900 | 4.23330500  |
| H | -4.76949900 | -3.01719700 | -0.59824600 |
| H | -1.55783700 | -4.43760600 | -3.06006400 |
| H | -3.96343500 | -4.11272000 | -2.64700000 |
| H | -3.07214000 | 1.59794200  | 3.41807300  |
| H | -0.79307600 | 4.74650100  | 1.60294100  |
| H | -1.53198300 | 3.50771700  | 3.59738300  |
| H | 0.92673300  | -4.47027900 | 0.45915800  |
| H | 3.28075900  | -5.05771600 | 0.01205100  |
| H | 4.25592100  | -4.69773400 | -2.24786500 |
| H | 0.48617100  | -3.15073000 | -3.61445100 |
| H | 2.84388900  | -3.74242500 | -4.05997400 |
| H | -3.31350100 | 4.40994200  | -1.91447400 |
| H | -2.55573600 | 5.73819300  | -3.84812200 |
| H | -0.17584100 | 6.43360500  | -4.03647700 |
| H | 0.68849200  | 4.44831400  | -0.32694800 |
| H | 1.43834300  | 5.79142800  | -2.25645200 |
| H | -4.92964200 | 0.32372000  | -2.58713600 |
| H | -5.14557200 | -1.02277000 | -1.47121000 |
| H | -6.17630300 | 0.40235100  | -1.33882000 |
| H | -0.10626900 | -1.07930800 | 3.35141800  |
| H | -1.63915100 | -0.23684900 | 3.55965200  |
| H | -1.48768100 | -1.91851700 | 4.07186300  |
| H | 6.64482000  | 1.41318700  | 0.65062600  |
| H | 8.27846900  | 0.47670400  | 2.30798400  |
| H | 8.34509900  | -1.02830700 | 1.40583900  |

|   |             |             |             |
|---|-------------|-------------|-------------|
| H | 4.30653500  | -1.77990600 | -0.32401000 |
| H | 2.12948800  | -1.29385600 | -1.32795100 |
| H | 4.01741800  | 1.76511900  | 2.08858000  |
| H | 1.81111200  | 2.25086000  | 1.10247700  |
| H | 5.87145400  | -1.40435900 | 1.57535300  |
| H | 6.78255800  | -0.03899200 | -0.32583400 |
| C | 9.38823000  | 2.13293600  | 0.34839900  |
| H | 11.57964400 | 0.45208000  | 0.43467600  |
| H | 10.88183000 | 0.49569700  | 2.05853400  |
| H | 10.77504800 | -0.98174000 | 1.08967300  |
| H | 9.30539600  | 0.18707600  | -0.55704300 |
| H | 10.24494500 | 2.48746200  | -0.23402000 |
| H | 8.48372000  | 2.50835300  | -0.14055300 |
| H | 9.44994300  | 2.59620600  | 1.34102000  |
| C | 0.49778600  | 0.88240400  | -0.78199700 |
| H | 0.29157700  | 1.94964300  | -0.74555400 |
| C | -0.23700800 | 0.14787900  | -1.73707200 |
| H | 5.74980200  | 0.04733500  | 2.56227200  |
| H | -0.76516400 | 0.72070100  | -2.49736200 |
| H | 0.12209700  | -0.82914600 | -2.05005100 |

### PR3<sub>1,2</sub>

|    |             |             |             |
|----|-------------|-------------|-------------|
| C  | 5.97045300  | -1.00785500 | 0.00785000  |
| C  | -4.30812600 | 0.94582200  | -0.07000800 |
| C  | -3.79299300 | 1.24554700  | -1.39103200 |
| C  | -3.56257700 | 1.80950400  | 0.84045900  |
| C  | -2.70582000 | 2.14410500  | -1.28282400 |
| C  | -2.56159200 | 2.53969300  | 0.08886200  |
| Zr | -2.04663800 | -0.01735800 | -0.08527700 |
| C  | -3.64460300 | -1.68469200 | 0.70045100  |
| C  | -2.91344400 | -2.33855500 | -0.38377700 |
| C  | -2.71135200 | -1.61331400 | 1.80441900  |
| C  | -1.56473800 | -2.62889000 | 0.06066900  |
| C  | -1.44552900 | -2.09168300 | 1.38759800  |
| Si | -5.22561100 | -0.63379000 | 0.48694700  |
| C  | -6.43474100 | -1.29717600 | -0.79606000 |
| C  | -6.22342400 | -0.44284400 | 2.07327100  |
| C  | -0.65406100 | -3.37333400 | -0.75120200 |
| C  | -3.27504000 | -2.66743600 | -1.71911200 |
| C  | -1.07833200 | -3.68893800 | -2.03848400 |
| C  | -2.35490900 | -3.32424200 | -2.51882100 |
| C  | -4.30335200 | 0.75186800  | -2.72179400 |
| C  | -2.97580200 | -1.21794300 | 3.23555700  |

|   |             |             |             |
|---|-------------|-------------|-------------|
| C | 0.65581500  | -3.84629300 | -0.24172100 |
| C | -1.68206200 | 3.47750600  | 0.73265500  |
| C | -3.67949200 | 2.04671000  | 2.24046300  |
| C | -1.82882900 | 3.63475500  | 2.10198200  |
| C | -2.81924200 | 2.93914800  | 2.84269100  |
| C | -0.68519900 | 4.27337500  | -0.02819800 |
| C | 0.76234700  | -4.44047900 | 1.02923600  |
| C | 1.98288100  | -4.93923600 | 1.48105800  |
| C | 3.11984900  | -4.84926100 | 0.67546600  |
| C | 1.80592000  | -3.77158500 | -1.04602700 |
| C | 3.02697900  | -4.26320000 | -0.58821600 |
| C | -1.03676800 | 4.93887300  | -1.21635100 |
| C | -0.09969000 | 5.71044900  | -1.90284700 |
| C | 1.20553300  | 5.82676800  | -1.42000900 |
| C | 0.62895700  | 4.40988900  | 0.45390300  |
| C | 1.56619600  | 5.17616400  | -0.23838100 |
| C | 6.91124900  | 0.21490600  | 0.06028700  |
| C | 8.38200900  | -0.17984000 | 0.24664400  |
| C | 9.38285500  | 0.99344600  | 0.22129200  |
| C | 4.51832200  | -0.62769800 | -0.17693400 |
| C | 3.68039900  | -0.40904400 | 0.92352600  |
| C | 2.35390600  | -0.01190300 | 0.75170900  |
| C | 1.82172900  | 0.17378000  | -0.52831800 |
| C | 3.97714400  | -0.44170700 | -1.45776400 |
| C | 2.65188200  | -0.05045100 | -1.63519500 |
| C | 10.82522700 | 0.46530100  | 0.22461200  |
| H | -2.14310100 | 2.53480900  | -2.11834600 |
| H | -0.57735700 | -2.17793400 | 2.02761500  |
| H | -7.33258400 | -0.66864600 | -0.78058200 |
| H | -6.07643700 | -1.32214000 | -1.82549400 |
| H | -6.74318700 | -2.31156500 | -0.51952200 |
| H | -6.96019500 | 0.35887700  | 1.95078700  |
| H | -6.77883300 | -1.37222100 | 2.24388300  |
| H | -5.64888400 | -0.23986100 | 2.97735400  |
| H | -4.27958800 | -2.49019200 | -2.08259300 |
| H | -0.42686500 | -4.27751600 | -2.67637200 |
| H | -2.63880800 | -3.61699800 | -3.52514000 |
| H | -4.47779900 | 1.58869200  | 2.81051700  |
| H | -1.20611900 | 4.36049500  | 2.61545100  |
| H | -2.92367500 | 3.15195400  | 3.90220900  |
| H | -0.12324200 | -4.55278200 | 1.64729600  |
| H | 2.04262600  | -5.41095100 | 2.45732600  |
| H | 4.07015300  | -5.23815200 | 1.02822300  |
| H | 1.74840800  | -3.30343000 | -2.02379900 |

|   |             |             |             |
|---|-------------|-------------|-------------|
| H | 3.90669300  | -4.18657700 | -1.21957100 |
| H | -2.05804400 | 4.88630400  | -1.58112100 |
| H | -0.39304000 | 6.23069500  | -2.80968600 |
| H | 1.93428000  | 6.42591500  | -1.95704500 |
| H | 0.91885300  | 3.90254600  | 1.36987300  |
| H | 2.57797400  | 5.26394200  | 0.14555100  |
| H | -3.67006600 | 1.12263100  | -3.53128200 |
| H | -4.33870700 | -0.33560600 | -2.80277500 |
| H | -5.31869500 | 1.12671100  | -2.88942500 |
| H | -2.03939000 | -1.18373700 | 3.79879500  |
| H | -3.46440100 | -0.25146700 | 3.34657200  |
| H | -3.61752800 | -1.97077500 | 3.70660400  |
| H | 6.58493000  | 0.87436900  | 0.87343900  |
| H | 8.49576300  | -0.72551400 | 1.19529500  |
| H | 8.65742200  | -0.89038700 | -0.54529100 |
| H | 4.06895900  | -0.55314100 | 1.92846400  |
| H | 1.72932900  | 0.15562900  | 1.62774100  |
| H | 4.60458400  | -0.60633400 | -2.33043900 |
| H | 2.26055200  | 0.08854100  | -2.63943200 |
| H | 6.28559600  | -1.66548300 | -0.81201900 |
| H | 6.79819400  | 0.79307500  | -0.86693000 |
| C | 9.16661700  | 1.97715900  | 1.38172100  |
| H | 11.54793700 | 1.28595000  | 0.16827000  |
| H | 11.03433000 | -0.09717000 | 1.14275700  |
| H | 11.00998100 | -0.20247300 | -0.62382700 |
| H | 9.22741600  | 1.54134100  | -0.72055900 |
| H | 9.90025300  | 2.78923400  | 1.34558300  |
| H | 8.17196600  | 2.43360700  | 1.35979200  |
| H | 9.28186800  | 1.47094100  | 2.34826900  |
| C | 0.40692600  | 0.68088600  | -0.74393700 |
| H | 0.41975500  | 1.75031400  | -0.97859500 |
| C | -0.49776300 | -0.07322100 | -1.71108900 |
| H | 6.08450300  | -1.58603400 | 0.93299100  |
| H | -0.71542500 | 0.48437900  | -2.62145300 |
| H | -0.13351100 | -1.07302000 | -1.94930300 |
| H | -0.03503400 | 0.68753900  | 0.32409300  |

### IM3<sub>2,1</sub>

|   |             |             |             |
|---|-------------|-------------|-------------|
| C | 0.77684200  | -0.59531400 | -2.30149400 |
| C | 1.08864300  | 1.40122900  | 2.31766300  |
| C | -0.22896800 | 1.36319700  | 1.73772500  |
| C | 1.86366200  | 2.31285400  | 1.48979900  |

|    |             |             |             |
|----|-------------|-------------|-------------|
| C  | -0.23750800 | 2.15245000  | 0.55007100  |
| C  | 1.03001300  | 2.80375600  | 0.40993600  |
| Zr | 1.30764700  | 0.11251100  | 0.20489300  |
| C  | 2.25903400  | -1.11522100 | 2.12472300  |
| C  | 1.31801200  | -2.09813000 | 1.60480300  |
| C  | 3.34426700  | -1.06509800 | 1.16761100  |
| C  | 1.81335500  | -2.59729900 | 0.34003800  |
| C  | 3.02232700  | -1.88499000 | 0.06100700  |
| Si | 1.86984100  | 0.13547100  | 3.50186100  |
| C  | 0.69018400  | -0.48097600 | 4.83721000  |
| C  | 3.39988700  | 0.72913000  | 4.42918400  |
| C  | 1.16423400  | -3.68446200 | -0.33565100 |
| C  | 0.13880900  | -2.67397900 | 2.16233100  |
| C  | 0.03657500  | -4.21648900 | 0.27171300  |
| C  | -0.47262600 | -3.71544100 | 1.49929100  |
| C  | -1.47767900 | 0.74583800  | 2.31883500  |
| C  | 4.67897700  | -0.37964800 | 1.29908500  |
| C  | 1.68521200  | -4.25042400 | -1.60792000 |
| C  | 1.50297300  | 3.85652000  | -0.45158000 |
| C  | 3.17717100  | 2.83545800  | 1.66256600  |
| C  | 2.80257000  | 4.29579900  | -0.24457300 |
| C  | 3.62831500  | 3.79842500  | 0.79272000  |
| C  | 0.63781600  | 4.56614300  | -1.42901700 |
| C  | 3.04724500  | -4.56373500 | -1.76820600 |
| C  | 3.51365400  | -5.12218300 | -2.95761000 |
| C  | 2.63203500  | -5.37408900 | -4.01126000 |
| C  | 0.80669000  | -4.52150600 | -2.67264600 |
| C  | 1.27658200  | -5.07456000 | -3.86397000 |
| C  | -0.30042100 | 3.89874400  | -2.23166400 |
| C  | -1.08152700 | 4.59008100  | -3.15744700 |
| C  | -0.94982700 | 5.97208500  | -3.29544700 |
| C  | 0.74814200  | 5.96268300  | -1.57152500 |
| C  | -0.03314200 | 6.65534900  | -2.49391000 |
| C  | 1.67011500  | 0.38235900  | -2.61067600 |
| C  | -0.64803700 | -0.37621900 | -1.98755800 |
| C  | -1.27890200 | -1.16486200 | -1.00471000 |
| C  | -2.63005800 | -0.97000300 | -0.68217600 |
| C  | -3.40079700 | -0.01481600 | -1.34629900 |
| C  | -1.43169600 | 0.58419100  | -2.66785700 |
| C  | -2.77013800 | 0.74872800  | -2.35496400 |
| C  | -4.87429900 | 0.20999400  | -1.06704800 |
| H  | -1.11853400 | 2.33708500  | -0.04925200 |
| H  | 3.66423900  | -2.03061600 | -0.79668400 |
| H  | 0.63793300  | 0.28528700  | 5.61942500  |

|   |             |             |             |
|---|-------------|-------------|-------------|
| H | -0.33215200 | -0.68260800 | 4.51640100  |
| H | 1.09012000  | -1.38935200 | 5.30134500  |
| H | 3.18333100  | 1.65936900  | 4.96587300  |
| H | 3.65306900  | -0.02741500 | 5.18094900  |
| H | 4.28908900  | 0.88508200  | 3.81766500  |
| H | -0.22949600 | -2.35357700 | 3.12885800  |
| H | -0.45069500 | -5.07207100 | -0.18567400 |
| H | -1.34088500 | -4.19639000 | 1.93954700  |
| H | 3.78612200  | 2.52960300  | 2.50322900  |
| H | 3.19523800  | 5.07971500  | -0.88381700 |
| H | 4.62101200  | 4.21945700  | 0.91905700  |
| H | 3.73583000  | -4.40792200 | -0.94373700 |
| H | 4.56567800  | -5.37217400 | -3.05704200 |
| H | 2.99795300  | -5.80719100 | -4.93701800 |
| H | -0.24930300 | -4.28841100 | -2.56687800 |
| H | 0.58314300  | -5.27161900 | -4.67597500 |
| H | -0.41311500 | 2.82665900  | -2.14208900 |
| H | -1.79296200 | 4.04890800  | -3.77536600 |
| H | -1.55917900 | 6.51202300  | -4.01349700 |
| H | 1.43262400  | 6.51302200  | -0.93401800 |
| H | 0.06745500  | 7.73308200  | -2.57921700 |
| H | -2.29759500 | 0.79642000  | 1.59954700  |
| H | -1.35691800 | -0.29910800 | 2.61019600  |
| H | -1.78108600 | 1.30367600  | 3.21173000  |
| H | 5.22135800  | -0.42784800 | 0.35175100  |
| H | 4.60288400  | 0.67025100  | 1.57831300  |
| H | 5.28096700  | -0.89051100 | 2.05923800  |
| H | 1.38666300  | 1.42776300  | -2.69605400 |
| H | -0.74781200 | -1.99295000 | -0.54757400 |
| H | -3.07971600 | -1.60366100 | 0.07355200  |
| H | -0.99099600 | 1.15190100  | -3.48068200 |
| H | -3.36156300 | 1.46900900  | -2.91470200 |
| H | 1.11895100  | -1.62828700 | -2.29336700 |
| H | 2.68719800  | 0.13662900  | -2.89160900 |
| H | -5.01277400 | 1.26797200  | -0.80161600 |
| H | -5.42011000 | 0.08124000  | -2.01224800 |
| H | 2.75116600  | 0.84921900  | -0.60271100 |
| C | -5.51899300 | -0.66846000 | 0.01099900  |
| H | -5.41131200 | -1.72727200 | -0.26180800 |
| H | -4.98500400 | -0.53423200 | 0.96002100  |
| C | -7.00828800 | -0.34693400 | 0.20197500  |
| H | -7.51136000 | -0.42880600 | -0.77127800 |
| H | -7.11664100 | 0.70285600  | 0.51210600  |
| C | -7.74730500 | -1.24644300 | 1.21299000  |

|   |             |             |            |
|---|-------------|-------------|------------|
| H | -7.60139000 | -2.29086400 | 0.89774700 |
| C | -7.19997900 | -1.10144000 | 2.64166200 |
| H | -7.75803200 | -1.73555300 | 3.33806400 |
| H | -6.14527400 | -1.38672500 | 2.71625800 |
| H | -7.29297500 | -0.06582800 | 2.99153400 |
| C | -9.25477000 | -0.95331000 | 1.18255000 |
| H | -9.67004800 | -1.09081600 | 0.17847500 |
| H | -9.79973400 | -1.61472200 | 1.86364700 |
| H | -9.45930000 | 0.07937900  | 1.48992700 |

### TS3<sub>2,1</sub>

|    |             |             |             |
|----|-------------|-------------|-------------|
| C  | 0.86023100  | -0.54925000 | -2.19217800 |
| C  | 1.06866000  | 1.40501300  | 2.31184900  |
| C  | -0.25308100 | 1.37493300  | 1.74644400  |
| C  | 1.84557300  | 2.29934200  | 1.46458200  |
| C  | -0.26828700 | 2.16048200  | 0.55357600  |
| C  | 1.00022800  | 2.80251700  | 0.39902300  |
| Zr | 1.23796100  | 0.08880000  | 0.19482700  |
| C  | 2.25464800  | -1.10470600 | 2.10193800  |
| C  | 1.33369300  | -2.11513600 | 1.59943200  |
| C  | 3.32695000  | -1.03168800 | 1.13023000  |
| C  | 1.82550300  | -2.60764600 | 0.33129300  |
| C  | 3.01385400  | -1.86694100 | 0.03441400  |
| Si | 1.86338600  | 0.13764200  | 3.48509400  |
| C  | 0.69300300  | -0.49132800 | 4.82240100  |
| C  | 3.39598000  | 0.73535100  | 4.40606700  |
| C  | 1.18880900  | -3.70342700 | -0.33934100 |
| C  | 0.16470300  | -2.70400800 | 2.16380300  |
| C  | 0.07052300  | -4.24918500 | 0.27396200  |
| C  | -0.43733200 | -3.75367800 | 1.50385800  |
| C  | -1.49816700 | 0.75981100  | 2.33848300  |
| C  | 4.65071600  | -0.32021000 | 1.23959300  |
| C  | 1.70836900  | -4.25744400 | -1.61721000 |
| C  | 1.46942900  | 3.86059100  | -0.46035300 |
| C  | 3.16242800  | 2.81914700  | 1.62813500  |
| C  | 2.77658500  | 4.28501000  | -0.27197200 |
| C  | 3.61218900  | 3.77828800  | 0.75380500  |
| C  | 0.59373300  | 4.59711400  | -1.40845100 |
| C  | 3.07268100  | -4.55606400 | -1.78545400 |
| C  | 3.53935000  | -5.10152100 | -2.98081800 |
| C  | 2.65534000  | -5.35445500 | -4.03218900 |
| C  | 0.82752500  | -4.52937200 | -2.67955400 |
| C  | 1.29766300  | -5.06912400 | -3.87679100 |



|   |             |             |             |
|---|-------------|-------------|-------------|
| C | -0.36728700 | 3.95546700  | -2.20451300 |
| C | -1.15758600 | 4.67244700  | -3.10261300 |
| C | -1.01243600 | 6.05516100  | -3.21777800 |
| C | 0.71749400  | 5.99495200  | -1.52698200 |
| C | -0.07310700 | 6.71325700  | -2.42134900 |
| C | 1.78410800  | 0.46566400  | -2.39027000 |
| C | -0.57363100 | -0.34847800 | -1.92503600 |
| C | -1.21444100 | -1.14746500 | -0.95196600 |
| C | -2.57635300 | -0.96886600 | -0.65224200 |
| C | -3.34406600 | -0.01786900 | -1.32093000 |
| C | -1.35942800 | 0.60959500  | -2.60960700 |
| C | -2.70330500 | 0.75673500  | -2.31713300 |
| C | -4.82380300 | 0.19416400  | -1.06421000 |
| H | -1.15567400 | 2.35193300  | -0.03371800 |
| H | 3.65074700  | -2.00720300 | -0.82820200 |
| H | 0.63628600  | 0.27261600  | 5.60654600  |
| H | -0.32834800 | -0.70056500 | 4.50318300  |
| H | 1.10150500  | -1.39742000 | 5.28347600  |
| H | 3.18255100  | 1.66783800  | 4.94005300  |
| H | 3.65156200  | -0.01861900 | 5.15958100  |
| H | 4.28319500  | 0.88803200  | 3.79052800  |
| H | -0.20519200 | -2.38446400 | 3.13006600  |
| H | -0.41035000 | -5.10918900 | -0.18183200 |
| H | -1.29873600 | -4.24334600 | 1.94800200  |
| H | 3.77412300  | 2.51601700  | 2.46771100  |
| H | 3.16542100  | 5.07145600  | -0.91049300 |
| H | 4.60786100  | 4.19473200  | 0.87190000  |
| H | 3.76327100  | -4.39868400 | -0.96277800 |
| H | 4.59330000  | -5.34052600 | -3.08675900 |
| H | 3.02119700  | -5.77730300 | -4.96271200 |
| H | -0.22987700 | -4.30604400 | -2.56782500 |
| H | 0.60271000  | -5.26661500 | -4.68738500 |
| H | -0.48985200 | 2.88357300  | -2.13223100 |
| H | -1.88652000 | 4.15052100  | -3.71658200 |
| H | -1.62902300 | 6.61519500  | -3.91393200 |
| H | 1.41973800  | 6.52584400  | -0.89230300 |
| H | 0.03797600  | 7.79125500  | -2.48844300 |
| H | -2.32611500 | 0.82101100  | 1.62947700  |
| H | -1.37820800 | -0.28928000 | 2.61644500  |
| H | -1.78822100 | 1.30916500  | 3.24085700  |
| H | 5.18950400  | -0.37999000 | 0.29047800  |
| H | 4.56204700  | 0.73347300  | 1.49973100  |
| H | 5.26639900  | -0.80692800 | 2.00445900  |
| H | 1.47035500  | 1.49733400  | -2.52897000 |

|   |             |             |             |
|---|-------------|-------------|-------------|
| H | -0.69336600 | -1.99080600 | -0.51053000 |
| H | -3.03250700 | -1.61531700 | 0.08872800  |
| H | -0.91201500 | 1.18499000  | -3.41319600 |
| H | -3.29422700 | 1.47180600  | -2.88435700 |
| H | 1.20335800  | -1.57852300 | -2.25103000 |
| H | 2.77286700  | 0.22895500  | -2.76701800 |
| H | -4.97322600 | 1.24580000  | -0.77976900 |
| H | -5.35271300 | 0.08118600  | -2.02091200 |
| H | 2.56208100  | 0.83552300  | -0.85425100 |
| C | -5.48187200 | -0.70878000 | -0.01487500 |
| H | -5.36384100 | -1.76129200 | -0.30719700 |
| H | -4.96401300 | -0.59135300 | 0.94529500  |
| C | -6.97556200 | -0.39835900 | 0.15902300  |
| H | -7.46348500 | -0.46363500 | -0.82318000 |
| H | -7.09399700 | 0.64464200  | 0.48783700  |
| C | -7.72531500 | -1.32072500 | 1.14114400  |
| H | -7.57018200 | -2.35810600 | 0.80762000  |
| C | -7.19935400 | -1.20185900 | 2.58026100  |
| H | -7.76530800 | -1.85120800 | 3.25595900  |
| H | -6.14488600 | -1.48522600 | 2.66460100  |
| H | -7.30092000 | -0.17357400 | 2.94888100  |
| C | -9.23345200 | -1.03339500 | 1.09454000  |
| H | -9.63332400 | -1.15255900 | 0.08191200  |
| H | -9.78531500 | -1.71055200 | 1.75429600  |
| H | -9.44707200 | -0.00790300 | 1.41933000  |

### PR3<sub>2,1</sub>

|    |             |             |             |
|----|-------------|-------------|-------------|
| C  | 0.94610000  | -0.46420000 | -2.03749100 |
| C  | 0.98895900  | 1.43699300  | 2.33193800  |
| C  | -0.33117400 | 1.36256800  | 1.77144000  |
| C  | 1.74410800  | 2.32741900  | 1.45998600  |
| C  | -0.37330600 | 2.13768400  | 0.56853800  |
| C  | 0.87487900  | 2.80844000  | 0.39930400  |
| Zr | 1.17583600  | 0.09340600  | 0.19148900  |
| C  | 2.27872900  | -1.01749500 | 2.08602600  |
| C  | 1.41293400  | -2.08104100 | 1.59154900  |
| C  | 3.34158000  | -0.89081700 | 1.10747900  |
| C  | 1.92655400  | -2.55322600 | 0.32483500  |
| C  | 3.07033500  | -1.74863300 | 0.01786300  |
| Si | 1.84376100  | 0.19188200  | 3.48651200  |
| C  | 0.71222400  | -0.50346700 | 4.82417700  |
| C  | 3.35603600  | 0.84109500  | 4.40662200  |

|   |              |              |              |
|---|--------------|--------------|--------------|
| C | 1. 33878100  | -3. 67193300 | -0. 34706600 |
| C | 0. 26677900  | -2. 71365700 | 2. 15238700  |
| C | 0. 23960500  | -4. 26173500 | 0. 26279100  |
| C | -0. 29093900 | -3. 78737900 | 1. 48988900  |
| C | -1. 56137400 | 0. 73018300  | 2. 37678400  |
| C | 4. 64106500  | -0. 13302700 | 1. 21208900  |
| C | 1. 88349400  | -4. 20153100 | -1. 62427100 |
| C | 1. 31450600  | 3. 87691300  | -0. 46715700 |
| C | 3. 04825200  | 2. 88611100  | 1. 61451700  |
| C | 2. 61837500  | 4. 31954400  | -0. 30038700 |
| C | 3. 47416700  | 3. 84019800  | 0. 72418800  |
| C | 0. 41166800  | 4. 61160900  | -1. 39105600 |
| C | 3. 25815100  | -4. 45209400 | -1. 78500000 |
| C | 3. 75042500  | -4. 97458700 | -2. 98037500 |
| C | 2. 88153500  | -5. 25132100 | -4. 03828600 |
| C | 1. 01820700  | -4. 49684800 | -2. 69268400 |
| C | 1. 51395500  | -5. 01290700 | -3. 88987700 |
| C | -0. 56900100 | 3. 97021000  | -2. 16262900 |
| C | -1. 38537100 | 4. 68870400  | -3. 03589700 |
| C | -1. 24764600 | 6. 07223000  | -3. 14946000 |
| C | 0. 52691100  | 6. 01090300  | -1. 50592300 |
| C | -0. 28961100 | 6. 73030700  | -2. 37552600 |
| C | 1. 87425400  | 0. 66099900  | -2. 29510500 |
| C | -0. 49998900 | -0. 33154100 | -1. 88140800 |
| C | -1. 12965500 | -1. 14650300 | -0. 90254700 |
| C | -2. 50876200 | -1. 02785000 | -0. 63146900 |
| C | -3. 30169200 | -0. 11131800 | -1. 31152300 |
| C | -1. 32064900 | 0. 59721500  | -2. 57211700 |
| C | -2. 67291500 | 0. 68529800  | -2. 30203600 |
| C | -4. 79307900 | 0. 04524000  | -1. 08026500 |
| H | -1. 26870100 | 2. 29551400  | -0. 01590900 |
| H | 3. 71052100  | -1. 86413100 | -0. 84644300 |
| H | 0. 61928300  | 0. 25185500  | 5. 61318500  |
| H | -0. 29868500 | -0. 76384400 | 4. 50883300  |
| H | 1. 16924400  | -1. 38984300 | 5. 27798600  |
| H | 3. 10792000  | 1. 75896100  | 4. 95089100  |
| H | 3. 64379200  | 0. 09026100  | 5. 15153700  |
| H | 4. 23500800  | 1. 03562500  | 3. 79081500  |
| H | -0. 12056800 | -2. 40453100 | 3. 11489800  |
| H | -0. 20717300 | -5. 13794600 | -0. 19669100 |
| H | -1. 13578200 | -4. 30862500 | 1. 92978500  |
| H | 3. 66602700  | 2. 61537800  | 2. 46048700  |
| H | 2. 98524000  | 5. 11002000  | -0. 94679200 |
| H | 4. 46047300  | 4. 28106700  | 0. 83168500  |

|   |             |             |             |
|---|-------------|-------------|-------------|
| H | 3.93793300  | -4.27519800 | -0.95702400 |
| H | 4.81251500  | -5.17693900 | -3.08130500 |
| H | 3.26700000  | -5.65616900 | -4.96891100 |
| H | -0.04626500 | -4.30734300 | -2.58683700 |
| H | 0.83123400  | -5.22826700 | -4.70626000 |
| H | -0.68613100 | 2.89816900  | -2.09234700 |
| H | -2.12951000 | 4.16658200  | -3.63103100 |
| H | -1.88490500 | 6.63316100  | -3.82602600 |
| H | 1.24208900  | 6.54262100  | -0.88663400 |
| H | -0.18458400 | 7.80907100  | -2.43999300 |
| H | -2.38084100 | 0.72787000  | 1.65560200  |
| H | -1.40766900 | -0.29943900 | 2.70524600  |
| H | -1.88307500 | 1.31006500  | 3.24898800  |
| H | 5.17691700  | -0.16848900 | 0.25960200  |
| H | 4.52516100  | 0.91389500  | 1.48641600  |
| H | 5.27805400  | -0.60878100 | 1.96630900  |
| H | 1.42770900  | 1.57853900  | -2.68613600 |
| H | -0.59778000 | -1.99570100 | -0.48381000 |
| H | -2.95127800 | -1.69603900 | 0.09880200  |
| H | -0.88862600 | 1.19221700  | -3.36994000 |
| H | -3.28499600 | 1.37068000  | -2.88399000 |
| H | 1.32346400  | -1.46679100 | -2.20675600 |
| H | 2.75126000  | 0.38716300  | -2.88504200 |
| H | -4.98789100 | 1.08770500  | -0.78909400 |
| H | -5.30256600 | -0.07993300 | -2.04598500 |
| C | -5.43375000 | -0.89041300 | -0.04886100 |
| H | -5.27388800 | -1.93512300 | -0.34932400 |
| H | -4.93305900 | -0.76450900 | 0.91939200  |
| C | -6.93961400 | -0.63588700 | 0.10898400  |
| H | -7.41336800 | -0.71012100 | -0.87950100 |
| H | -7.09982300 | 0.39918200  | 0.44512000  |
| C | -7.66675700 | -1.59337600 | 1.07449300  |
| H | -7.46642700 | -2.62163800 | 0.73679400  |
| C | -7.16572700 | -1.46396300 | 2.52163200  |
| H | -7.71337200 | -2.14115800 | 3.18505400  |
| H | -6.10161900 | -1.70394700 | 2.61825000  |
| H | -7.31479800 | -0.44349200 | 2.89576600  |
| C | -9.18427800 | -1.36541500 | 1.00860000  |
| H | -9.56515100 | -1.49533600 | -0.01001300 |
| H | -9.71808200 | -2.06695900 | 1.65772300  |
| H | -9.44278500 | -0.35069500 | 1.33455300  |
| H | 2.38877700  | 1.03658900  | -1.30881500 |

[IM3<sub>1,2</sub>]

|    |              |             |             |
|----|--------------|-------------|-------------|
| C  | -10.44306800 | 1.18386800  | 0.30717200  |
| C  | 5.48806800   | -1.47436900 | 0.96954900  |
| C  | 5.51424200   | -1.54926500 | -0.47255000 |
| C  | 4.33417000   | -2.26400400 | 1.38321400  |
| C  | 4.36624400   | -2.24858200 | -0.92507800 |
| C  | 3.64644600   | -2.75465600 | 0.20855500  |
| Zr | 3.59376400   | -0.08548400 | 0.23317200  |
| C  | 5.07583800   | 1.19474400  | 1.72853400  |
| C  | 5.04049100   | 2.02413200  | 0.53263500  |
| C  | 3.76695500   | 1.32725800  | 2.33236800  |
| C  | 3.72347200   | 2.61531500  | 0.40469300  |
| C  | 2.94125600   | 2.11329700  | 1.49378600  |
| Si | 6.35701900   | -0.17481300 | 2.05901900  |
| C  | 8.10788700   | 0.22965900  | 1.48859400  |
| C  | 6.51169200   | -0.64427300 | 3.87709200  |
| C  | 3.44194100   | 3.57807300  | -0.62529500 |
| C  | 6.04505800   | 2.35967500  | -0.42108400 |
| C  | 4.46137500   | 3.85257700  | -1.52375600 |
| C  | 5.74122600   | 3.24788500  | -1.42923600 |
| C  | 6.58759500   | -1.06770500 | -1.41840800 |
| C  | 3.29571500   | 0.81418500  | 3.66872300  |
| C  | 2.14532900   | 4.29894900  | -0.71187700 |
| C  | 2.51664200   | -3.62980400 | 0.32422700  |
| C  | 3.85113500   | -2.62632500 | 2.67025500  |
| C  | 2.10158300   | -3.94988000 | 1.60947000  |
| C  | 2.75327000   | -3.45502900 | 2.76233500  |
| C  | 1.85154800   | -4.24248000 | -0.85394400 |
| C  | 1.51067600   | 4.80760500  | 0.43622300  |
| C  | 0.31545100   | 5.51853700  | 0.33592100  |
| C  | -0.27394000  | 5.73543700  | -0.91167700 |
| C  | 1.54613000   | 4.53716900  | -1.96308700 |
| C  | 0.34805200   | 5.24484400  | -2.06167400 |
| C  | 2.59310100   | -4.76342200 | -1.93053300 |
| C  | 1.95551900   | -5.38428100 | -3.00502000 |
| C  | 0.56478000   | -5.50273700 | -3.02613100 |
| C  | 0.45119900   | -4.37771900 | -0.88539300 |
| C  | -0.18443000  | -5.00206400 | -1.95878300 |
| C  | -11.32129900 | -0.02668700 | 0.68864500  |
| C  | -12.76907900 | 0.36625100  | 1.00933500  |
| C  | -13.71387400 | -0.81295400 | 1.31868200  |
| C  | -9.01474200  | 0.79795100  | -0.00859200 |
| C  | -8.04898600  | 0.70935200  | 1.00356900  |
| C  | -6.74615300  | 0.30009200  | 0.72295900  |
| C  | -6.36174900  | -0.03422800 | -0.58199100 |

|   |              |             |             |
|---|--------------|-------------|-------------|
| C | -8.62583800  | 0.46761300  | -1.31358000 |
| C | -7.32280500  | 0.05852400  | -1.59611200 |
| C | -15.16485600 | -0.32201300 | 1.43344300  |
| H | 2.03652700   | -0.55617400 | 1.05234000  |
| H | 4.16098500   | -2.47520800 | -1.96270700 |
| H | 1.91175000   | 2.36017500  | 1.71114200  |
| H | 8.77119400   | -0.57844100 | 1.81785600  |
| H | 8.24365200   | 0.34084100  | 0.41221700  |
| H | 8.45284400   | 1.15022300  | 1.97251400  |
| H | 7.03597600   | -1.60171300 | 3.97218700  |
| H | 7.12664100   | 0.11372900  | 4.37580200  |
| H | 5.57387100   | -0.71237200 | 4.42893400  |
| H | 7.05417400   | 1.98328700  | -0.31115300 |
| H | 4.29858000   | 4.60460600  | -2.28938100 |
| H | 6.51048400   | 3.53990000  | -2.13762200 |
| H | 4.38020700   | -2.32109400 | 3.56419800  |
| H | 1.27938700   | -4.64679400 | 1.73617900  |
| H | 2.40024100   | -3.77099200 | 3.73913600  |
| H | 1.97679300   | 4.68325900  | 1.40807000  |
| H | -0.14894100  | 5.91594100  | 1.23348700  |
| H | -1.20312500  | 6.29182200  | -0.98786500 |
| H | 2.01850300   | 4.15721000  | -2.86480000 |
| H | -0.09723100  | 5.41431400  | -3.03748100 |
| H | 3.67737400   | -4.72793700 | -1.90475700 |
| H | 2.54873800   | -5.79237900 | -3.81792400 |
| H | 0.07015300   | -5.99049400 | -3.86037400 |
| H | -0.14022200  | -3.97953700 | -0.06618900 |
| H | -1.26620300  | -5.10012200 | -1.96012600 |
| H | 6.29703700   | -1.26804600 | -2.45354300 |
| H | 6.80313400   | -0.00125300 | -1.33730300 |
| H | 7.52060500   | -1.60864800 | -1.22836800 |
| H | 2.22609200   | 1.00287300  | 3.78691000  |
| H | 3.45393900   | -0.25535000 | 3.80692500  |
| H | 3.82378700   | 1.33842300  | 4.47317900  |
| H | -10.86312100 | -0.53505700 | 1.54545900  |
| H | -12.77813400 | 1.06328200  | 1.86075100  |
| H | -13.17785500 | 0.92641200  | 0.15663000  |
| H | -8.32323300  | 0.95958600  | 2.02575000  |
| H | -6.02016700  | 0.23280200  | 1.53071900  |
| H | -9.35432700  | 0.52756300  | -2.11867900 |
| H | -7.05210000  | -0.19804400 | -2.61822600 |
| H | -10.88754900 | 1.69085800  | -0.55831700 |
| H | -11.30938600 | -0.75047000 | -0.13759300 |
| C | -13.30354700 | -1.57968400 | 2.58544900  |

|   |              |             |             |
|---|--------------|-------------|-------------|
| H | -15.85265500 | -1.15536000 | 1.61219300  |
| H | -15.27547100 | 0.38257200  | 2.26685400  |
| H | -15.48863400 | 0.18972300  | 0.52056100  |
| H | -13.66207100 | -1.51123300 | 0.46934000  |
| H | -13.99882900 | -2.40178500 | 2.78585400  |
| H | -12.30108900 | -2.01094300 | 2.50296800  |
| H | -13.31286200 | -0.91837000 | 3.46094100  |
| C | 1.59623500   | -0.34284900 | -2.10001100 |
| H | 1.79145200   | -1.39215900 | -2.32201100 |
| C | 2.67439500   | 0.50966600  | -2.09250500 |
| H | -10.45549200 | 1.90756500  | 1.13194700  |
| H | 3.61085300   | 0.16211800  | -2.53148000 |
| H | 2.54417800   | 1.58487500  | -2.03046800 |
| C | 0.20507100   | -0.03480400 | -1.84945400 |
| C | -0.73628300  | -1.08089300 | -1.92997700 |
| C | -0.26522200  | 1.26500900  | -1.55084500 |
| C | -2.08911300  | -0.84578800 | -1.71373000 |
| H | -0.39728200  | -2.08582500 | -2.16262800 |
| C | -1.61333200  | 1.48745000  | -1.33140900 |
| H | 0.42332600   | 2.10076900  | -1.49262800 |
| C | -2.55711300  | 0.44083200  | -1.40730700 |
| H | -2.78479800  | -1.67428200 | -1.78308400 |
| H | -1.95382100  | 2.49316800  | -1.10061500 |
| C | -4.02170200  | 0.74844600  | -1.17794400 |
| H | -4.10126300  | 1.46586900  | -0.35169200 |
| H | -4.40541200  | 1.28355400  | -2.05856800 |
| C | -4.94001700  | -0.45556600 | -0.88994700 |
| H | -4.94462700  | -1.13025600 | -1.75397800 |
| H | -4.53124300  | -1.02424300 | -0.04560200 |

**[TS3<sub>1,2</sub>]**

|    |             |             |             |
|----|-------------|-------------|-------------|
| C  | 10.60222300 | -0.37196200 | 1.60064800  |
| C  | -5.54874500 | 0.65258500  | 1.44922100  |
| C  | -6.01455000 | 0.70466100  | 0.08150800  |
| C  | -4.56749300 | 1.72489000  | 1.56712500  |
| C  | -5.27635300 | 1.68485000  | -0.63389300 |
| C  | -4.41729000 | 2.37767600  | 0.28161100  |
| Zr | -3.63977100 | -0.14640100 | 0.11230200  |
| C  | -4.23000400 | -1.81441000 | 1.82817200  |
| C  | -4.37544500 | -2.54302900 | 0.57350900  |
| C  | -2.80732200 | -1.61154100 | 1.99471100  |
| C  | -3.06815500 | -2.72487900 | -0.02661600 |
| C  | -2.12405900 | -2.09890300 | 0.84985800  |

|    |             |             |             |
|----|-------------|-------------|-------------|
| Si | -5.65471500 | -0.83678100 | 2.64016900  |
| C  | -7.32661400 | -1.70668800 | 2.61013000  |
| C  | -5.33797000 | -0.42076500 | 4.45083700  |
| C  | -2.91481600 | -3.46694000 | -1.24969200 |
| C  | -5.51857700 | -3.09839700 | -0.07478100 |
| C  | -4.06864900 | -3.94998800 | -1.84303800 |
| C  | -5.35247100 | -3.77244300 | -1.26296600 |
| C  | -7.17108200 | -0.03325700 | -0.54638000 |
| C  | -2.07691300 | -1.04389400 | 3.18654100  |
| C  | -1.58432000 | -3.77116200 | -1.83593100 |
| C  | -3.56852800 | 3.52423000  | 0.12720000  |
| C  | -3.81429200 | 2.20480400  | 2.67676200  |
| C  | -2.87853000 | 3.95116900  | 1.25360000  |
| C  | -2.99473600 | 3.30088400  | 2.50550300  |
| C  | -3.45171200 | 4.25527700  | -1.16058700 |
| C  | -0.53490800 | -4.26297300 | -1.03991400 |
| C  | 0.69133100  | -4.60333200 | -1.61057700 |
| C  | 0.89697600  | -4.44894900 | -2.98387700 |
| C  | -1.36740300 | -3.62987800 | -3.21868800 |
| C  | -0.13649400 | -3.96005100 | -3.78618000 |
| C  | -4.58569800 | 4.56911000  | -1.93196600 |
| C  | -4.46151800 | 5.27862300  | -3.12569200 |
| C  | -3.20375000 | 5.68527500  | -3.57656300 |
| C  | -2.19361700 | 4.68715500  | -1.61912500 |
| C  | -2.07027900 | 5.39015100  | -2.81720800 |
| C  | 11.49958300 | 0.12838400  | 0.44926700  |
| C  | 12.98990600 | -0.13532000 | 0.70085900  |
| C  | 13.92931300 | 0.24929400  | -0.45988500 |
| C  | 9.13131100  | -0.11234000 | 1.36110300  |
| C  | 8.32719900  | -1.04586700 | 0.70000100  |
| C  | 6.97691600  | -0.79202800 | 0.44399600  |
| C  | 6.38237100  | 0.40961000  | 0.84308400  |
| C  | 8.53312700  | 1.09240600  | 1.76068100  |
| C  | 7.18907000  | 1.34707300  | 1.50643700  |
| C  | 15.36022100 | -0.23047800 | -0.17339600 |
| H  | -2.04997800 | 0.77774500  | 0.38636400  |
| H  | -5.44951100 | 1.95008700  | -1.66784600 |
| H  | -1.05152600 | -2.06618900 | 0.71388600  |
| H  | -8.02501500 | -1.12276500 | 3.22057900  |
| H  | -7.78340500 | -1.82743200 | 1.62731500  |
| H  | -7.24091600 | -2.69674700 | 3.07156800  |
| H  | -6.04981500 | 0.34038400  | 4.78908000  |
| H  | -5.52145500 | -1.32381200 | 5.04445300  |
| H  | -4.33154000 | -0.07659800 | 4.69113900  |



|   |             |             |             |
|---|-------------|-------------|-------------|
| H | -6.49262000 | -3.05243000 | 0.39480400  |
| H | -3.98364600 | -4.54423800 | -2.74734200 |
| H | -6.21151500 | -4.22616400 | -1.74776800 |
| H | -3.93956100 | 1.76549700  | 3.65823300  |
| H | -2.26375400 | 4.84321700  | 1.18367600  |
| H | -2.45169500 | 3.70137100  | 3.35605600  |
| H | -0.69255700 | -4.41572700 | 0.02322400  |
| H | 1.48281700  | -5.00234900 | -0.98313600 |
| H | 1.85126900  | -4.71683800 | -3.42706200 |
| H | -2.16743000 | -3.25313900 | -3.85004400 |
| H | 0.01314400  | -3.83965100 | -4.85487900 |
| H | -5.57272800 | 4.29425700  | -1.57385000 |
| H | -5.35046700 | 5.52495600  | -3.69859700 |
| H | -3.10906700 | 6.23526300  | -4.50766300 |
| H | -1.30462500 | 4.46358000  | -1.03558000 |
| H | -1.08886500 | 5.70800900  | -3.15596800 |
| H | -7.18031600 | 0.12122600  | -1.62888900 |
| H | -7.16334300 | -1.10717400 | -0.36550500 |
| H | -8.11250700 | 0.36215600  | -0.14876400 |
| H | -1.01404100 | -0.93216000 | 2.95867000  |
| H | -2.44814100 | -0.06895600 | 3.50533000  |
| H | -2.16875900 | -1.72800000 | 4.03735800  |
| H | 11.31882800 | 1.20011100  | 0.30364500  |
| H | 13.30699300 | 0.39915000  | 1.60886900  |
| H | 13.12499500 | -1.20429800 | 0.91816900  |
| H | 8.75960900  | -1.99154800 | 0.38131000  |
| H | 6.39539100  | -1.55067200 | -0.07057100 |
| H | 9.12994700  | 1.83776500  | 2.28121800  |
| H | 6.75378200  | 2.28989900  | 1.83167900  |
| H | 10.76761700 | -1.44747200 | 1.74162100  |
| H | 11.18963600 | -0.36284100 | -0.48325300 |
| C | 13.91613000 | 1.75727400  | -0.75429000 |
| H | 16.03049300 | -0.00151300 | -1.00876100 |
| H | 15.76633800 | 0.25948000  | 0.72009500  |
| H | 15.39394200 | -1.31219400 | -0.00316200 |
| H | 13.57407100 | -0.27394600 | -1.36086300 |
| H | 14.59927100 | 2.00084100  | -1.57500800 |
| H | 12.92171500 | 2.11547200  | -1.03798300 |
| H | 14.23965000 | 2.32831000  | 0.12501100  |
| C | -1.49535200 | 0.88541000  | -1.24152900 |
| H | -1.69725900 | 1.95280200  | -1.19227100 |
| C | -2.43201900 | 0.11548700  | -1.96388600 |
| H | 10.91392200 | 0.11482400  | 2.53341100  |
| H | -3.13978300 | 0.66111500  | -2.58547000 |

|   |             |             |             |
|---|-------------|-------------|-------------|
| H | -2.14709500 | -0.86820700 | -2.32745300 |
| C | -0.08626700 | 0.54405600  | -0.95973300 |
| C | 0.69292500  | 1.45368600  | -0.22554200 |
| C | 0.53232300  | -0.62337200 | -1.44050300 |
| C | 2.03730200  | 1.20624100  | 0.03386200  |
| H | 0.23261300  | 2.36182900  | 0.15648800  |
| C | 1.87630400  | -0.86325000 | -1.17873900 |
| H | -0.02318700 | -1.33695800 | -2.03869000 |
| C | 2.65797400  | 0.03859800  | -0.43583500 |
| H | 2.60469200  | 1.93342900  | 0.60351600  |
| H | 2.33361800  | -1.76915500 | -1.56716800 |
| C | 4.11876900  | -0.28822800 | -0.18780200 |
| H | 4.16408400  | -1.25846100 | 0.32495700  |
| H | 4.60143800  | -0.45144200 | -1.16067400 |
| C | 4.91735300  | 0.74594800  | 0.60849100  |
| H | 4.86244200  | 1.71531500  | 0.09484200  |
| H | 4.43446200  | 0.89907400  | 1.58379700  |

**[PR3<sub>1,2</sub>]**

|    |             |             |             |
|----|-------------|-------------|-------------|
| C  | 10.76952400 | -1.03977200 | 0.14570100  |
| C  | -6.12713800 | 0.98516700  | 0.01625200  |
| C  | -5.63833200 | 1.28246600  | -1.31522700 |
| C  | -5.36520400 | 1.85215700  | 0.91000800  |
| C  | -4.54989500 | 2.18190500  | -1.23009700 |
| C  | -4.37824300 | 2.57990000  | 0.13784200  |
| Zr | -3.86574100 | 0.02381500  | -0.04228900 |
| C  | -5.44441200 | -1.64043100 | 0.78675800  |
| C  | -4.73338300 | -2.30199900 | -0.30631700 |
| C  | -4.48953200 | -1.55756800 | 1.87124300  |
| C  | -3.37527900 | -2.58502400 | 0.11354800  |
| C  | -3.23062900 | -2.03528900 | 1.43300800  |
| Si | -7.03173800 | -0.59413900 | 0.59583400  |
| C  | -8.26042300 | -1.26460800 | -0.66456800 |
| C  | -8.00429500 | -0.39800700 | 2.19731600  |
| C  | -2.47889300 | -3.33383900 | -0.70983700 |
| C  | -5.12123000 | -2.64426800 | -1.63074000 |
| C  | -2.92871500 | -3.66334600 | -1.98501600 |
| C  | -4.21599300 | -3.30699300 | -2.44247800 |
| C  | -6.17051100 | 0.78023700  | -2.63418600 |
| C  | -4.72680400 | -1.15427200 | 3.30462100  |
| C  | -1.15655400 | -3.79600800 | -0.22322200 |
| C  | -3.48471600 | 3.51701400  | 0.76307200  |
| C  | -5.45824800 | 2.09544000  | 2.31064400  |

|   |             |             |             |
|---|-------------|-------------|-------------|
| C | -3.60687700 | 3.67865400  | 2.13439600  |
| C | -4.58635700 | 2.98862800  | 2.89455000  |
| C | -2.49887200 | 4.30778700  | -0.01731600 |
| C | -1.02092400 | -4.37732600 | 1.05090800  |
| C | 0.21140200  | -4.86487400 | 1.48256700  |
| C | 1.33130300  | -4.77633700 | 0.65323600  |
| C | -0.02353600 | -3.72299900 | -1.05159000 |
| C | 1.20947600  | -4.20314900 | -0.61393000 |
| C | -2.86871000 | 4.97058900  | -1.20143800 |
| C | -1.94108100 | 5.73698900  | -1.90637800 |
| C | -0.62745600 | 5.85078500  | -1.44627300 |
| C | -1.17625600 | 4.44171200  | 0.44177400  |
| C | -0.24863400 | 5.20286200  | -0.26884800 |
| C | 11.67014600 | 0.21327600  | 0.14115200  |
| C | 13.16253400 | -0.12726700 | 0.24441900  |
| C | 14.11758100 | 1.08109100  | 0.16680100  |
| C | 2.70571500  | -0.53967700 | -0.38582000 |
| C | 1.91048100  | -0.32558500 | 0.74670900  |
| C | 0.57345200  | 0.05543500  | 0.62661100  |
| C | -0.01119700 | 0.23058800  | -0.63176600 |
| C | 2.11108700  | -0.36715500 | -1.64477900 |
| C | 0.77574200  | 0.00878500  | -1.77043500 |
| C | 15.57647700 | 0.60745800  | 0.08401300  |
| H | -4.00311900 | 2.57004400  | -2.07732600 |
| H | -2.34984300 | -2.11429600 | 2.05652400  |
| H | -9.15757400 | -0.63542000 | -0.63895700 |
| H | -7.91776300 | -1.29573200 | -1.69914300 |
| H | -8.56516500 | -2.27719600 | -0.37753100 |
| H | -8.74667600 | 0.39954700  | 2.08154600  |
| H | -8.55253200 | -1.32877500 | 2.38286700  |
| H | -7.41651400 | -0.18637200 | 3.09093500  |
| H | -6.13328900 | -2.47231700 | -1.97555300 |
| H | -2.28857600 | -4.25598400 | -2.63057300 |
| H | -4.51959700 | -3.61031900 | -3.43987300 |
| H | -6.24743100 | 1.64080900  | 2.89589500  |
| H | -2.97322200 | 4.40423300  | 2.63453800  |
| H | -4.67225700 | 3.20594600  | 3.95481300  |
| H | -1.89318400 | -4.48859900 | 1.68782900  |
| H | 0.29371300  | -5.32671000 | 2.46191800  |
| H | 2.29094500  | -5.15601300 | 0.99036900  |
| H | -0.10365100 | -3.26460900 | -2.03239600 |
| H | 2.07595600  | -4.12749200 | -1.26342600 |
| H | -3.89625100 | 4.92015200  | -1.54847400 |
| H | -2.24826400 | 6.25525500  | -2.80976700 |

|   |             |             |             |
|---|-------------|-------------|-------------|
| H | 0.09387800  | 6.44587000  | -1.99763700 |
| H | -0.87234000 | 3.93643500  | 1.35433300  |
| H | 0.76984300  | 5.28871900  | 0.09738600  |
| H | -5.55916400 | 1.15791300  | -3.45723300 |
| H | -6.19185800 | -0.30799900 | -2.71247100 |
| H | -7.19412300 | 1.14061900  | -2.78160200 |
| H | -3.77730700 | -1.08326400 | 3.84197700  |
| H | -5.24431700 | -0.20370300 | 3.41862400  |
| H | -5.33067700 | -1.92254400 | 3.80044000  |
| H | 11.36707700 | 0.86512900  | 0.96926200  |
| H | 13.34914000 | -0.66928600 | 1.18376500  |
| H | 13.41923300 | -0.82724800 | -0.56320100 |
| H | 2.34089600  | -0.46013100 | 1.73577700  |
| H | -0.01747200 | 0.21939600  | 1.52628400  |
| H | 2.70464200  | -0.52957800 | -2.54126300 |
| H | 0.34265100  | 0.13828300  | -2.75866000 |
| H | 11.48398000 | 0.78311700  | -0.77937900 |
| C | 13.93354000 | 2.05328400  | 1.34236400  |
| H | 16.26401500 | 1.45444300  | -0.01326200 |
| H | 15.86026900 | 0.05334500  | 0.98717500  |
| H | 15.73555000 | -0.05353600 | -0.77497500 |
| H | 13.88829600 | 1.62619300  | -0.76161800 |
| H | 14.63254200 | 2.89308900  | 1.26724500  |
| H | 12.92257400 | 2.47055000  | 1.38082600  |
| H | 14.12426100 | 1.54898400  | 2.29800900  |
| C | -1.43753900 | 0.72477300  | -0.79425200 |
| H | -1.44153900 | 1.79153000  | -1.04094800 |
| C | -2.37312800 | -0.04604600 | -1.71834400 |
| H | -2.62575100 | 0.49872100  | -2.62752600 |
| H | -2.01257400 | -1.04707000 | -1.95686300 |
| H | -1.83768400 | 0.73998300  | 0.28956500  |
| C | 4.17024300  | -0.89328100 | -0.26045400 |
| H | 4.34458000  | -1.45308200 | 0.66522000  |
| H | 4.46903300  | -1.55046100 | -1.08523000 |
| C | 5.08800100  | 0.35861400  | -0.26743700 |
| H | 4.79528900  | 1.01232200  | 0.56290200  |
| H | 4.90228400  | 0.92345400  | -1.18883100 |
| C | 6.55634100  | 0.01015700  | -0.16057300 |
| C | 7.18321200  | -0.10233200 | 1.08708300  |
| C | 7.32203500  | -0.24539800 | -1.30548000 |
| C | 8.52858100  | -0.45549500 | 1.18584200  |
| H | 6.61325600  | 0.09374600  | 1.99300000  |
| C | 8.66723400  | -0.59846000 | -1.20572100 |
| H | 6.86188800  | -0.16198800 | -2.28794900 |

|   |             |             |             |
|---|-------------|-------------|-------------|
| C | 9.29686700  | -0.70887900 | 0.04145500  |
| H | 8.99146700  | -0.53330700 | 2.16692600  |
| H | 9.23964200  | -0.78875900 | -2.11068000 |
| H | 11.05959200 | -1.69237800 | -0.68735900 |
| H | 10.95533300 | -1.60875300 | 1.06543500  |

**[IM3<sub>2,1</sub>]**

|    |             |             |             |
|----|-------------|-------------|-------------|
| C  | 2.30247800  | -0.65700600 | -2.26420500 |
| C  | 2.69851800  | 1.68233800  | 2.19827900  |
| C  | 1.35916000  | 1.38035400  | 1.76348900  |
| C  | 3.21846400  | 2.65205600  | 1.24684900  |
| C  | 1.09877800  | 2.07199400  | 0.54371900  |
| C  | 2.21274300  | 2.91813500  | 0.23693800  |
| Zr | 2.93872400  | 0.31273500  | 0.13951900  |
| C  | 4.25958100  | -0.61136500 | 2.01261200  |
| C  | 3.45322900  | -1.76772800 | 1.64717300  |
| C  | 5.22416600  | -0.44978700 | 0.94515200  |
| C  | 3.89994700  | -2.26215300 | 0.36293000  |
| C  | 4.93998600  | -1.38393800 | -0.07811300 |
| Si | 3.79897000  | 0.65045900  | 3.35627200  |
| C  | 2.87841600  | -0.06248100 | 4.83929700  |
| C  | 5.28742200  | 1.55235400  | 4.07954400  |
| C  | 3.37810500  | -3.48197800 | -0.18518300 |
| C  | 2.45083400  | -2.49066400 | 2.35769600  |
| C  | 2.42141000  | -4.14852400 | 0.56572000  |
| C  | 1.96035800  | -3.65870100 | 1.81643600  |
| C  | 0.30091000  | 0.59364400  | 2.49783800  |
| C  | 6.43069100  | 0.45134200  | 0.89916800  |
| C  | 3.85546400  | -4.03862300 | -1.47861900 |
| C  | 2.41014000  | 3.97286900  | -0.72368900 |
| C  | 4.43136900  | 3.39886800  | 1.25128400  |
| C  | 3.62568100  | 4.63999900  | -0.67766000 |
| C  | 4.62129700  | 4.36210200  | 0.29027200  |
| C  | 1.34458300  | 4.45442800  | -1.64004000 |
| C  | 5.22727500  | -4.13881300 | -1.77375200 |
| C  | 5.65684900  | -4.69151200 | -2.97967500 |
| C  | 4.72727200  | -5.14984200 | -3.91595900 |
| C  | 2.93090600  | -4.51574100 | -2.42566100 |
| C  | 3.36290000  | -5.06252000 | -3.63405600 |
| C  | 0.46990400  | 3.58133100  | -2.30510200 |
| C  | -0.50790000 | 4.06211200  | -3.17563200 |
| C  | -0.64098900 | 5.43350800  | -3.39456100 |
| C  | 1.18865900  | 5.83596200  | -1.86279600 |

|   |             |             |             |
|---|-------------|-------------|-------------|
| C | 0.21077500  | 6.31823100  | -2.73012500 |
| C | 2.98337200  | 0.42857500  | -2.71848100 |
| C | 0.89322500  | -0.65223400 | -1.82674800 |
| C | 0.49002000  | -1.44846900 | -0.73617300 |
| C | -0.84432800 | -1.45417800 | -0.30233300 |
| C | -1.81952100 | -0.70059700 | -0.95737700 |
| C | -0.09566200 | 0.10841200  | -2.49164500 |
| C | -1.41261400 | 0.07424300  | -2.06724800 |
| C | -9.47648800 | -1.23906900 | 1.50652700  |
| H | 0.14706100  | 2.05947100  | 0.02992400  |
| H | 5.51176500  | -1.48174600 | -0.99047000 |
| H | 2.78305500  | 0.72992900  | 5.59063800  |
| H | 1.87484000  | -0.43833800 | 4.63904500  |
| H | 3.46425400  | -0.86965200 | 5.29272000  |
| H | 4.96759500  | 2.46539900  | 4.59376900  |
| H | 5.74331100  | 0.89911900  | 4.83266700  |
| H | 6.06967200  | 1.81645500  | 3.36742800  |
| H | 2.13460800  | -2.17226800 | 3.34296700  |
| H | 2.04181400  | -5.09942900 | 0.20477500  |
| H | 1.23442200  | -4.24480900 | 2.37180500  |
| H | 5.16269800  | 3.25775400  | 2.03633400  |
| H | 3.81164600  | 5.43321900  | -1.39432500 |
| H | 5.53269700  | 4.95203400  | 0.28823900  |
| H | 5.96048000  | -3.82110900 | -1.03910300 |
| H | 6.72020700  | -4.77513100 | -3.18320900 |
| H | 5.06448700  | -5.57804900 | -4.85480200 |
| H | 1.86700200  | -4.44809800 | -2.21536400 |
| H | 2.63316600  | -5.42052600 | -4.35403400 |
| H | 0.56216800  | 2.51443200  | -2.15191300 |
| H | -1.16594000 | 3.36484300  | -3.68706600 |
| H | -1.40367800 | 5.80972400  | -4.06925100 |
| H | 1.82113300  | 6.53859600  | -1.32972800 |
| H | 0.10741900  | 7.38877200  | -2.87909200 |
| H | -0.58602400 | 0.47618900  | 1.87186600  |
| H | 0.62564600  | -0.40367200 | 2.80047800  |
| H | 0.00239000  | 1.13332900  | 3.40330900  |
| H | 6.88731600  | 0.41708400  | -0.09298200 |
| H | 6.20447800  | 1.49421100  | 1.11731100  |
| H | 7.17551100  | 0.10632800  | 1.62535800  |
| H | 2.51867500  | 1.40372600  | -2.83597400 |
| H | 1.19157000  | -2.13376400 | -0.27168000 |
| H | -1.11455100 | -2.08706100 | 0.53558100  |
| H | 0.17390500  | 0.67416700  | -3.37738900 |
| H | -2.16248400 | 0.63862400  | -2.61587100 |

|   |              |             |             |
|---|--------------|-------------|-------------|
| H | 2.81358200   | -1.61706100 | -2.23565800 |
| H | 3.99893400   | 0.33456900  | -3.08417100 |
| H | 4.15075000   | 1.22278700  | -0.85016300 |
| C | -10.15196100 | -0.34377400 | 0.44626300  |
| H | -9.70191200  | 0.65781000  | 0.48590700  |
| H | -9.92064800  | -0.74287900 | -0.54863600 |
| C | -11.66992000 | -0.23649400 | 0.64084500  |
| H | -11.86929900 | 0.09162500  | 1.67070700  |
| H | -12.12032600 | -1.23628300 | 0.55013200  |
| C | -12.38921700 | 0.72515200  | -0.32645500 |
| H | -11.90899400 | 1.71125700  | -0.23227300 |
| C | -12.27294700 | 0.28248700  | -1.79320700 |
| H | -12.80721300 | 0.97439900  | -2.45300700 |
| H | -11.23324000 | 0.24253000  | -2.13294900 |
| H | -12.71013400 | -0.71369500 | -1.93610600 |
| C | -13.86409200 | 0.88176500  | 0.07319500  |
| H | -13.96481000 | 1.23784000  | 1.10424400  |
| H | -14.37884400 | 1.59470800  | -0.57958300 |
| H | -14.39318700 | -0.07622300 | -0.00095600 |
| C | -3.28506400  | -0.70686100 | -0.57109000 |
| H | -3.59684900  | 0.32681700  | -0.36906900 |
| H | -3.86930600  | -1.01213400 | -1.44941500 |
| C | -3.68922500  | -1.59130500 | 0.62249200  |
| H | -3.39656000  | -2.62947200 | 0.42362200  |
| H | -3.14101300  | -1.27208400 | 1.51819300  |
| C | -5.17936800  | -1.52725000 | 0.88765500  |
| C | -6.05669100  | -2.43611300 | 0.28315200  |
| C | -5.72300300  | -0.53490500 | 1.71285200  |
| C | -7.43252100  | -2.35135700 | 0.49335300  |
| H | -5.65988300  | -3.22584800 | -0.35139800 |
| C | -7.09919200  | -0.45143400 | 1.92150200  |
| H | -5.06298200  | 0.17532400  | 2.20705200  |
| C | -7.98062900  | -1.35592600 | 1.31367300  |
| H | -8.09135200  | -3.07529100 | 0.01987300  |
| H | -7.49571900  | 0.32265000  | 2.57412500  |
| H | -9.93057400  | -2.23728700 | 1.47277000  |
| H | -9.68861000  | -0.83517500 | 2.50428900  |

**[TS3<sub>2,1</sub>]**

|   |            |             |             |
|---|------------|-------------|-------------|
| C | 2.63116400 | -0.63440000 | -2.09342900 |
| C | 2.64151800 | 1.34532200  | 2.40455900  |
| C | 1.35633600 | 1.37358400  | 1.75810800  |
| C | 3.51119600 | 2.19782200  | 1.60411300  |

|    |             |             |             |
|----|-------------|-------------|-------------|
| C  | 1.45257700  | 2.15167500  | 0.56209400  |
| C  | 2.75830500  | 2.73324600  | 0.48453200  |
| Zr | 2.88167300  | 0.01169400  | 0.30261900  |
| C  | 3.72180100  | -1.21406400 | 2.27529400  |
| C  | 2.78879700  | -2.18783900 | 1.72220800  |
| C  | 4.85638100  | -1.19941300 | 1.37242700  |
| C  | 3.33401300  | -2.71147800 | 0.48776500  |
| C  | 4.57288100  | -2.02810100 | 0.26193100  |
| Si | 3.30446600  | 0.05159400  | 3.63158400  |
| C  | 2.02758700  | -0.51938200 | 4.89647100  |
| C  | 4.80282500  | 0.59270500  | 4.64169800  |
| C  | 2.68866100  | -3.78131500 | -0.21686600 |
| C  | 1.56322700  | -2.72142900 | 2.21878200  |
| C  | 1.50993600  | -4.27159000 | 0.32932500  |
| C  | 0.95310700  | -3.74714000 | 1.52660300  |
| C  | 0.04750500  | 0.82266200  | 2.27251900  |
| C  | 6.20452900  | -0.55251800 | 1.56182300  |
| C  | 3.25823600  | -4.36820000 | -1.45898700 |
| C  | 3.33042800  | 3.76315000  | -0.34747300 |
| C  | 4.83893500  | 2.65557600  | 1.84881700  |
| C  | 4.64215400  | 4.12885000  | -0.07681600 |
| C  | 5.38757000  | 3.58918100  | 1.00189300  |
| C  | 2.55214100  | 4.53188700  | -1.35432900 |
| C  | 4.61674600  | -4.72742400 | -1.54444500 |
| C  | 5.12863000  | -5.30549000 | -2.70692700 |
| C  | 4.29655900  | -5.53180300 | -3.80733400 |
| C  | 2.42927100  | -4.61312600 | -2.57004400 |
| C  | 2.94469100  | -5.18605400 | -3.73412300 |
| C  | 1.61314300  | 3.92841000  | -2.20642400 |
| C  | 0.91284000  | 4.67423600  | -3.15602200 |
| C  | 1.12872800  | 6.04916700  | -3.26913000 |
| C  | 2.74864400  | 5.92251700  | -1.47283000 |
| C  | 2.04817100  | 6.66988900  | -2.41898700 |
| C  | 3.61523300  | 0.33320800  | -2.24361400 |
| C  | 1.19354400  | -0.36173200 | -1.92373300 |
| C  | 0.45117800  | -1.11783700 | -0.98732700 |
| C  | -0.91974500 | -0.87456300 | -0.78496400 |
| C  | -1.59597800 | 0.10118800  | -1.51660900 |
| C  | 0.50218000  | 0.62509300  | -2.66830200 |
| C  | -0.85174100 | 0.83599800  | -2.47202300 |
| C  | -9.58930400 | 0.79357900  | -0.51571300 |
| H  | 0.61339700  | 2.38155600  | -0.07978000 |
| H  | 5.25512000  | -2.20347700 | -0.55846400 |
| H  | 1.96595900  | 0.24308500  | 5.68199100  |



|   |               |              |              |
|---|---------------|--------------|--------------|
| H | 1. 01678400   | -0. 67160000 | 4. 51606200  |
| H | 2. 35951600   | -1. 44844800 | 5. 37361300  |
| H | 4. 60060700   | 1. 54528700  | 5. 14427000  |
| H | 4. 97445900   | -0. 15671300 | 5. 42339300  |
| H | 5. 73363300   | 0. 69174800  | 4. 08191900  |
| H | 1. 15257200   | -2. 38161200 | 3. 16140200  |
| H | 1. 01833700   | -5. 11171700 | -0. 15161800 |
| H | 0. 04604100   | -4. 19556700 | 1. 92084300  |
| H | 5. 38023400   | 2. 32778500  | 2. 72655900  |
| H | 5. 10744200   | 4. 89209800  | -0. 69220900 |
| H | 6. 39258200   | 3. 95905500  | 1. 18107200  |
| H | 5. 26434600   | -4. 59254200 | -0. 68353900 |
| H | 6. 17560100   | -5. 59101400 | -2. 74885700 |
| H | 4. 69723000   | -5. 98043900 | -4. 71120900 |
| H | 1. 37778100   | -4. 34289900 | -2. 52308400 |
| H | 2. 29024500   | -5. 36214000 | -4. 58264000 |
| H | 1. 43711100   | 2. 86361400  | -2. 13770900 |
| H | 0. 19912600   | 4. 18146700  | -3. 81077300 |
| H | 0. 58254700   | 6. 63172500  | -4. 00466700 |
| H | 3. 43416700   | 6. 42613400  | -0. 79862200 |
| H | 2. 21326800   | 7. 74115500  | -2. 48491300 |
| H | -0. 73078900  | 0. 92228500  | 1. 51280900  |
| H | 0. 09545800   | -0. 23020700 | 2. 55977400  |
| H | -0. 27078800  | 1. 39038500  | 3. 15412500  |
| H | 6. 79199900   | -0. 62912200 | 0. 64300100  |
| H | 6. 15290400   | 0. 50160500  | 1. 83018800  |
| H | 6. 75346500   | -1. 07590000 | 2. 35338600  |
| H | 3. 36324400   | 1. 37663000  | -2. 41641000 |
| H | 0. 90074000   | -1. 97674400 | -0. 49916800 |
| H | -1. 45425000  | -1. 49241700 | -0. 07189200 |
| H | 1. 02951600   | 1. 16926600  | -3. 44507900 |
| H | -1. 36895400  | 1. 56900300  | -3. 08653800 |
| H | 2. 92699000   | -1. 67934900 | -2. 12488100 |
| H | 4. 61322400   | 0. 04239200  | -2. 55238600 |
| H | 4. 30411100   | 0. 68870300  | -0. 66325900 |
| C | -10. 44194800 | -0. 22095300 | 0. 27728800  |
| H | -10. 29762300 | -1. 22213800 | -0. 15202900 |
| H | -10. 06216300 | -0. 27122700 | 1. 30505000  |
| C | -11. 93592800 | 0. 13261200  | 0. 27368900  |
| H | -12. 26621400 | 0. 25042500  | -0. 76838400 |
| H | -12. 07943600 | 1. 11472700  | 0. 74935600  |
| C | -12. 85503100 | -0. 89636900 | 0. 96464100  |
| H | -12. 67846000 | -1. 87286300 | 0. 48754400  |
| C | -12. 55312900 | -1. 04213100 | 2. 46528800  |

|   |              |             |             |
|---|--------------|-------------|-------------|
| H | -13.23385600 | -1.76254400 | 2.93195000  |
| H | -11.53141700 | -1.38883400 | 2.65065600  |
| H | -12.68084900 | -0.08295500 | 2.98331700  |
| C | -14.33094400 | -0.52657100 | 0.74568300  |
| H | -14.57304000 | -0.45768500 | -0.32084200 |
| H | -14.99766200 | -1.27147800 | 1.19362000  |
| H | -14.56287800 | 0.44334200  | 1.20326900  |
| C | -3.07901000  | 0.38283800  | -1.37078500 |
| H | -3.20713300  | 1.40589400  | -0.98968200 |
| H | -3.52767700  | 0.39469800  | -2.37267800 |
| C | -3.88321900  | -0.58337400 | -0.47954100 |
| H | -3.74124300  | -1.61001700 | -0.84033900 |
| H | -3.49415300  | -0.54993500 | 0.54608400  |
| C | -5.36055000  | -0.24506400 | -0.47086100 |
| C | -5.90106100  | 0.61524100  | 0.49414000  |
| C | -6.21790400  | -0.75164900 | -1.45791200 |
| C | -7.25388700  | 0.95947900  | 0.47121400  |
| H | -5.25940100  | 1.01992800  | 1.27448100  |
| C | -7.56957300  | -0.40648700 | -1.47928100 |
| H | -5.82563300  | -1.42577300 | -2.21682100 |
| C | -8.11384200  | 0.45602900  | -0.51568100 |
| H | -7.64867200  | 1.62914000  | 1.23174400  |
| H | -8.21341000  | -0.81329700 | -2.25558200 |
| H | -9.95685100  | 0.83762800  | -1.54892900 |
| H | -9.73807400  | 1.79393000  | -0.08975800 |

**[PR3<sub>2,1</sub>]**

|    |            |             |             |
|----|------------|-------------|-------------|
| C  | 2.73395800 | -0.55231300 | -1.94662400 |
| C  | 2.54419100 | 1.36166200  | 2.41616100  |
| C  | 1.26213200 | 1.35978700  | 1.76857800  |
| C  | 3.40613200 | 2.20037000  | 1.59390200  |
| C  | 1.34492500 | 2.13000300  | 0.56488100  |
| C  | 2.63852900 | 2.72609300  | 0.47685200  |
| Zr | 2.80355900 | -0.00358100 | 0.29675500  |
| C  | 3.69849800 | -1.16671700 | 2.26830500  |
| C  | 2.80411700 | -2.17858100 | 1.71971100  |
| C  | 4.83353400 | -1.11699300 | 1.36689900  |
| C  | 3.37487300 | -2.69573100 | 0.49578300  |
| C  | 4.58683900 | -1.96872300 | 0.26704800  |
| Si | 3.24620900 | 0.07885000  | 3.63072600  |
| C  | 1.99690800 | -0.54014600 | 4.89955300  |
| C  | 4.73228600 | 0.65149800  | 4.64082800  |
| C  | 2.76532900 | -3.78036500 | -0.21123600 |

|   |              |              |              |
|---|--------------|--------------|--------------|
| C | 1. 58189100  | -2. 73081400 | 2. 19950300  |
| C | 1. 58848100  | -4. 29131300 | 0. 32007800  |
| C | 1. 00368000  | -3. 77197500 | 1. 50332400  |
| C | -0. 04060100 | 0. 80557000  | 2. 29248400  |
| C | 6. 16477300  | -0. 43346800 | 1. 55396600  |
| C | 3. 36390800  | -4. 35511500 | -1. 44406600 |
| C | 3. 19658600  | 3. 76402700  | -0. 35859100 |
| C | 4. 72969200  | 2. 67885000  | 1. 83152900  |
| C | 4. 51313300  | 4. 12363000  | -0. 11058000 |
| C | 5. 27079500  | 3. 59744000  | 0. 96703700  |
| C | 2. 39947900  | 4. 55677000  | -1. 33099400 |
| C | 4. 72767200  | -4. 69374000 | -1. 50559900 |
| C | 5. 26879900  | -5. 25669000 | -2. 66080300 |
| C | 4. 46085600  | -5. 48735800 | -3. 77648700 |
| C | 2. 55916000  | -4. 60453600 | -2. 57000400 |
| C | 3. 10422800  | -5. 16169900 | -3. 72663900 |
| C | 1. 41746000  | 3. 98536100  | -2. 15421300 |
| C | 0. 69956900  | 4. 75822500  | -3. 06672300 |
| C | 0. 93954000  | 6. 12843800  | -3. 17004200 |
| C | 2. 61800200  | 5. 94466500  | -1. 43685100 |
| C | 1. 90029900  | 6. 71825700  | -2. 34614500 |
| C | 3. 74561000  | 0. 51548900  | -2. 11258600 |
| C | 1. 29210500  | -0. 32956800 | -1. 90128800 |
| C | 0. 53986700  | -1. 10179800 | -0. 97512200 |
| C | -0. 84717600 | -0. 89884500 | -0. 81244300 |
| C | -1. 52671500 | 0. 06269000  | -1. 55047200 |
| C | 0. 58697600  | 0. 64836500  | -2. 64920300 |
| C | -0. 77422700 | 0. 81823800  | -2. 48606000 |
| C | -9. 52676300 | 0. 69774900  | -0. 57262100 |
| H | 0. 50172300  | 2. 33318100  | -0. 08009200 |
| H | 5. 27656600  | -2. 13187700 | -0. 55016700 |
| H | 1. 89781600  | 0. 22573700  | 5. 67754400  |
| H | 0. 99417900  | -0. 74829200 | 4. 52491100  |
| H | 2. 37595300  | -1. 44630000 | 5. 38507700  |
| H | 4. 50606200  | 1. 59291100  | 5. 15348600  |
| H | 4. 92494500  | -0. 10079200 | 5. 41442200  |
| H | 5. 65957100  | 0. 78088600  | 4. 08182100  |
| H | 1. 14710300  | -2. 38861900 | 3. 12999900  |
| H | 1. 11922400  | -5. 14077000 | -0. 16643300 |
| H | 0. 09716200  | -4. 23298400 | 1. 88368600  |
| H | 5. 27220300  | 2. 37525400  | 2. 71682700  |
| H | 4. 96902900  | 4. 88702700  | -0. 73235100 |
| H | 6. 27407400  | 3. 97643100  | 1. 13593800  |
| H | 5. 35708900  | -4. 55322200 | -0. 63210100 |

|   |              |             |             |
|---|--------------|-------------|-------------|
| H | 6.32029800   | -5.52672800 | -2.68525100 |
| H | 4.88448600   | -5.92412400 | -4.67555600 |
| H | 1.50408100   | -4.34727600 | -2.54102100 |
| H | 2.46852200   | -5.34069200 | -4.58850100 |
| H | 1.22112100   | 2.92453400  | -2.09367100 |
| H | -0.04811600  | 4.28855100  | -3.69982600 |
| H | 0.37876900   | 6.73204000  | -3.87689700 |
| H | 3.33432600   | 6.42676500  | -0.77953600 |
| H | 2.08396000   | 7.78693400  | -2.40225100 |
| H | -0.80008200  | 0.81148500  | 1.50821200  |
| H | 0.03908800   | -0.21539700 | 2.66989900  |
| H | -0.40331700  | 1.43287000  | 3.11458000  |
| H | 6.76855600   | -0.53022600 | 0.64748100  |
| H | 6.09061200   | 0.62713400  | 1.78836200  |
| H | 6.71329400   | -0.92012700 | 2.36821700  |
| H | 3.38473600   | 1.46367200  | -2.51767000 |
| H | 0.98560500   | -1.98083300 | -0.51834000 |
| H | -1.38398800  | -1.53904900 | -0.12079200 |
| H | 1.11610100   | 1.21656900  | -3.40730300 |
| H | -1.29601300  | 1.53819300  | -3.11251100 |
| H | 3.06180900   | -1.57619600 | -2.08777800 |
| H | 4.64867400   | 0.19783300  | -2.63775200 |
| C | -10.36743100 | -0.29467300 | 0.25783900  |
| H | -10.22861000 | -1.30645900 | -0.14705200 |
| H | -9.97272800  | -0.31875900 | 1.28061100  |
| C | -11.86033600 | 0.05858200  | 0.26753300  |
| H | -12.20582500 | 0.15196400  | -0.77169800 |
| H | -11.99666500 | 1.05197900  | 0.72083000  |
| C | -12.76986200 | -0.95173800 | 0.99535600  |
| H | -12.60467700 | -1.93808500 | 0.53538900  |
| C | -12.44276900 | -1.06855900 | 2.49204700  |
| H | -13.11672600 | -1.77758000 | 2.98451800  |
| H | -11.41915300 | -1.41410200 | 2.66695500  |
| H | -12.55916700 | -0.09952600 | 2.99358300  |
| C | -14.24716400 | -0.58197400 | 0.79440800  |
| H | -14.50770400 | -0.53340200 | -0.26854000 |
| H | -14.90818200 | -1.31536200 | 1.26828000  |
| H | -14.46863700 | 0.39727300  | 1.23632400  |
| H | 4.20571800   | 0.84206100  | -1.08164800 |
| C | -3.01760500  | 0.31568900  | -1.43846500 |
| H | -3.17510500  | 1.34182200  | -1.07791600 |
| H | -3.44861700  | 0.30066800  | -2.44801400 |
| C | -3.81748700  | -0.64993100 | -0.54501200 |
| H | -3.66929000  | -1.67751100 | -0.89987200 |

|   |             |             |             |
|---|-------------|-------------|-------------|
| H | -3.42970400 | -0.60974500 | 0.48068900  |
| C | -5.29586700 | -0.32022400 | -0.53654000 |
| C | -6.15342900 | -0.83823300 | -1.51551700 |
| C | -5.83726100 | 0.54448400  | 0.42254500  |
| C | -7.50586700 | -0.50005600 | -1.53488000 |
| H | -5.76035300 | -1.51580000 | -2.27066100 |
| C | -7.19038700 | 0.88137400  | 0.40196800  |
| H | -5.19475400 | 0.95886800  | 1.19692000  |
| C | -8.05065600 | 0.36631800  | -0.57702400 |
| H | -8.15003800 | -0.91606600 | -2.30584100 |
| H | -7.58567500 | 1.55512000  | 1.15849200  |
| H | -9.90369600 | 0.71120100  | -1.60295000 |
| H | -9.67417200 | 1.70979400  | -0.17513700 |
